# Supplementary material for: Identification of complex III, NQR, and SDH as primary bioenergetic enzymes during the stationary phase of Pseudomonas aeruginosa cultured in urine-like conditions
Source: Front Microbiol. 2024 Feb 21;15:1347466. doi: 10.3389/fmicb.2024.1347466 (PMC10926992; doi:10.3389/fmicb.2024.1347466)
Supplement: Supplementary file 2 [file Table_2.xlsx]

## Sheet: AUM_log
Protein ID	Locus_Tag	## Accession	Provided_UniProt_Accessions	Enzyme_Classification_Number	UniProtKB Accession	UniProtKB ID	KEGG_Ortholog	Pathways	Annotation	Sequence_Length	Function	Gene Length	Gene Name	Estimated MW (kDa)	CumulativePartialPeptideSequences	AverageSequenceCoverage
															AUM_log	AUM_log
1	PA0136	NP_248826	A0A8G4YPV4	N/A	Q9I6Z6	Q9I6Z6_PSEAE	K23537	N/A	ABC transporter ATP-binding protein [Pseudomonas aeruginosa PAO1]	523	Transport of small molecules	1572		55.8	1	Could Not Be Accurately Determined
2	PA0155	NP_248845	A0A072ZG59	N/A	Q9I6X7	Q9I6X7_PSEAE	K02624	N/A	transcriptional regulator PcaR [Pseudomonas aeruginosa PAO1]	279	Aromatic compound catabolism,Carbon compound catabolism,Transcriptional regulators	840	pcaR	30.6	1	0.04
3	PA0217	NP_248908	A0A6A9K4Q5	N/A	Q9I6S1	Q9I6S1_PSEAE	K13928	N/A	transcriptional regulator [Pseudomonas aeruginosa PAO1]	309	Transcriptional regulators	930		34.6	1	0.03
4	PA0330	NP_249021	A0A4P0TJ60	5.3.1.6	Q9I6G1	RPIA_PSEAE	K01807	Pentose phosphate pathway;Carbon fixation in photosynthetic organisms;Metabolic pathways;Biosynthesis of secondary metabolites;Microbial metabolism in diverse environments;Carbon metabolism;Biosynthesis of amino acids	ribose-5-phosphate isomerase A [Pseudomonas aeruginosa PAO1]	223	Carbon fixation,Energy metabolism,Pentose phosphate cycle	672	rpiA	23.7	1	0.09
5	PA0353	NP_249044	A0A8G8K946	N/A	Q9I6E0	ILVD_PSEAE	K01687	Valine, leucine and isoleucine biosynthesis;Pantothenate and CoA biosynthesis;Metabolic pathways;Biosynthesis of secondary metabolites;2-Oxocarboxylic acid metabolism;Biosynthesis of amino acids	dihydroxy-acid dehydratase [Pseudomonas aeruginosa PAO1]	612	Amino acid biosynthesis and metabolism,Biosynthesis of cofactors, prosthetic groups and carriers,Pantothenate and CoA biosynthesis,Valine, leucine and isoleucine biosynthesis	1839	ilvD	65.2	1	0.02
6	PA0386	NP_249077	A0A8A9A2A3	N/A	Q9I6A9	Q9I6A9_PSEAE	N/A	N/A	coproporphyrinogen III oxidase [Pseudomonas aeruginosa PAO1]	384	Putative enzymes	1155		42.5	1	0.03
7	PA0420	NP_249111	A0A2R3J3W9	2.6.1.62	Q9I693	Q9I693_PSEAE	K00833	Biotin metabolism;Metabolic pathways;Biosynthesis of cofactors	adenosylmethionine--8-amino-7-oxononanoate aminotransferase BioA [Pseudomonas aeruginosa PAO1]	467	Biosynthesis of cofactors, prosthetic groups and carriers,Biotin metabolism	1404	bioA	52.5	1	0.06
8	PA0503	NP_249194	A0A8G7JWU6	N/A	Q9I615	Q9I615_PSEAE	K02169	Biotin metabolism;Metabolic pathways;Biosynthesis of cofactors	biotin synthesis protein BioC [Pseudomonas aeruginosa PAO1]	274	Biosynthesis of cofactors, prosthetic groups and carriers,Biotin metabolism	825		29.7	2	0.12
9	PA0774	NP_249465	A0A4P0TCR2	N/A	Q9I5G4	CMOB_PSEAE	K15257	N/A	tRNA (mo5U34)-methyltransferase [Pseudomonas aeruginosa PAO1]	322	Hypothetical unclassified unknown	969		36.5	1	Could Not Be Accurately Determined
10	PA0841	NP_249532	A0A8G3WR25	N/A	Q9I599	Q9I599_PSEAE	N/A	N/A	hypothetical protein PA0841 [Pseudomonas aeruginosa PAO1]	319	Hypothetical unclassified unknown	960		34.5	1	0.07
11	PA0906	NP_249597	A0A8H0WX71	N/A	Q9I551	Q9I551_PSEAE	N/A	N/A	transcriptional regulator [Pseudomonas aeruginosa PAO1]	237	Transcriptional regulators	714	alpR	25.9	1	Could Not Be Accurately Determined
12	PA0930	NP_249621	A0A8A4F8K2	N/A	Q9I528	Q9I528_PSEAE	K19609	Two-component system	two-component sensor [Pseudomonas aeruginosa PAO1]	445	Transport of small molecules,Two component regulatory systems,Two-component System	1338		50.2	1	0.02
13	PA0995	NP_249686	A0A080VS17	2.1.1.63	Q9I4X4	Q9I4X4_PSEAE	K00567	N/A	methylated-DNA--protein-cysteine methyltransferase [Pseudomonas aeruginosa PAO1]	173	DNA replication recombination modification and repair	522	ogt	19.3	1	0.08
14	PA1083	NP_249774	A0A8G4TUB3	N/A	Q9I4P6	FLGH_PSEAE	K02393	N/A	flagellar basal body L-ring protein [Pseudomonas aeruginosa PAO1]	231	Cell wall LPS capsule,Flagella assembly,Motility	696	flgH	24.5	1	0.11
15	PA1098	NP_249789	A0A8G2YNQ6	N/A	Q9I4N4	Q9I4N4_PSEAE	K10942	Two-component system;Biofilm formation - Vibrio cholerae	two-component sensor [Pseudomonas aeruginosa PAO1]	402	Two component regulatory systems,Two-component System	1209	fleS	43.9	1	0.06
16	PA1099	NP_249790	A0A8G4MM37	N/A	Q9I4N3	Q9I4N3_PSEAE	K10943	Two-component system;Biofilm formation - Vibrio cholerae	two-component response regulator [Pseudomonas aeruginosa PAO1]	473	Motility,Transcriptional regulators,Two component regulatory systems,Two-component System	1422	fleR	51.2	2	0.08
17	PA1128	NP_249819	A0A8G3X8G8	N/A	Q9I4K7	Q9I4K7_PSEAE	N/A	N/A	transcriptional regulator [Pseudomonas aeruginosa PAO1]	303	Transcriptional regulators	912		33.5	1	Could Not Be Accurately Determined
18	PA1313	NP_250004	A0A367LZX5	N/A	Q9I431	Q9I431_PSEAE	N/A	N/A	major facilitator superfamily transporter [Pseudomonas aeruginosa PAO1]	452	Membrane proteins,Transport of small molecules	1359		47.2	1	0.03
19	PA1331	NP_250022	A0A367LY01	N/A	Q9I413	Q9I413_PSEAE	N/A	N/A	hypothetical protein PA1331 [Pseudomonas aeruginosa PAO1]	515	Hypothetical unclassified unknown	1548		57.4	1	Could Not Be Accurately Determined
20	PA1524	NP_250215	A0A8G8GZ70	N/A	Q9I3I9	Q9I3I9_PSEAE	K13481	Purine metabolism;Metabolic pathways;Microbial metabolism in diverse environments;Nucleotide metabolism	xanthine dehydrogenase [Pseudomonas aeruginosa PAO1]	484	Nucleotide biosynthesis and metabolism	1455	xdhA	52.9	2	0.04
21	PA1527	NP_250218	A0A2R3INJ7;A0A8D9JGG4	N/A	Q9I3I6	Q9I3I6_PSEAE	K03529	N/A	hypothetical protein PA1527 [Pseudomonas aeruginosa PAO1]	1162	Hypothetical unclassified unknown	3489		131.6	2	0.01
22	PA1534	NP_250225	A0A7M3A065	N/A	Q9I3H9	RECR_PSEAE	K06187	N/A	recombination protein RecR [Pseudomonas aeruginosa PAO1]	198	DNA replication recombination modification and repair	597	recR	21.2	2	0.2
23	PA1570	NP_250261	A0A0A8RQC4	N/A	Q9I3E7	Q9I3E7_PSEAE	N/A	N/A	transcriptional regulator [Pseudomonas aeruginosa PAO1]	293	Transcriptional regulators	882		32.4	1	0.04
24	PA1667	NP_250358	A0A8G2RDI4	N/A	Q9I358	Q9I358_PSEAE	K11893	N/A	hypothetical protein PA1667 [Pseudomonas aeruginosa PAO1]	443	Protein secretion export apparatus	1332	hsiJ2	49.7	1	Could Not Be Accurately Determined
25	PA1674	NP_250365	A0A069Q8V6	3.5.4.16	Q9I351	GCH12_PSEAE	K01495	Folate biosynthesis;Metabolic pathways;Biosynthesis of cofactors	GTP cyclohydrolase I [Pseudomonas aeruginosa PAO1]	181	Biosynthesis of cofactors, prosthetic groups and carriers,Folate biosynthesis	546	folE2	20.2	3	0.3
26	PA1700	NP_250391	A0A8G7DRC8	N/A	Q9I329	Q9I329_PSEAE	N/A	N/A	hypothetical protein PA1700 [Pseudomonas aeruginosa PAO1]	123	Protein secretion export apparatus,Secreted factors (toxins, enzymes, alginate),Type III Secretion	372	pcr2	13.7	1	0.12
27	PA1741	NP_250432	A0A8A9B1F4	N/A	Q9I2Z6	Q9I2Z6_PSEAE	N/A	N/A	hypothetical protein PA1741 [Pseudomonas aeruginosa PAO1]	123	Hypothetical unclassified unknown	372		14	1	0.14
28	PA1760	NP_250451	A0A0A8RQ71	N/A	Q9I2X9	Q9I2X9_PSEAE	K03556	N/A	transcriptional regulator [Pseudomonas aeruginosa PAO1]	907	Transcriptional regulators	2724		101.6	2	0.03
29	PA1776	NP_250467	A0A0C6EJU7	N/A	Q9I2W5	Q9I2W5_PSEAE	K03088	N/A	RNA polymerase sigma factor SigX [Pseudomonas aeruginosa PAO1]	165	Transcriptional regulators	498	sigX	19.7	1	0.1
30	PA2034	NP_250724	A0A0C7AI32	N/A	Q9I281	Q9I281_PSEAE	K15256	N/A	hypothetical protein PA2034 [Pseudomonas aeruginosa PAO1]	224	Hypothetical unclassified unknown	675		24.5	1	0.06
31	PA2063	NP_250753	A0A3M5EI40	N/A	Q9I252	Q9I252_PSEAE	N/A	N/A	hypothetical protein PA2063 [Pseudomonas aeruginosa PAO1]	407	Hypothetical unclassified unknown	1224		46.5	1	0.04
32	PA2185	NP_250875	A0A1C7BED8	N/A	Q9I1T0	Q9I1T0_PSEAE	K07217	N/A	non-heme catalase KatN [Pseudomonas aeruginosa PAO1]	294	Adaptation protection	885	katN	31.6	1	Could Not Be Accurately Determined
33	PA2369	NP_251059	A0A8G3JIX8	N/A	Q9I1B0	Q9I1B0_PSEAE	K11896	N/A	hypothetical protein PA2369 [Pseudomonas aeruginosa PAO1]	597	Membrane proteins	1794	hsiG3	65.9	1	0.01
34	PA2445	NP_251135	A0A8G3D3X7	N/A	Q9I137	GCSP1_PSEAE	K00281	Glycine, serine and threonine metabolism;Glyoxylate and dicarboxylate metabolism;Lipoic acid metabolism;Metabolic pathways;Biosynthesis of secondary metabolites;Carbon metabolism	glycine dehydrogenase [Pseudomonas aeruginosa PAO1]	959	Amino acid biosynthesis and metabolism,Central intermediary metabolism,Glycine, serine and threonine metabolism	2880	gcvP2	103.9	2	0.03
35	PA2468	NP_251158	A0A8G1KA41	N/A	Q9I114	Q9I114_PSEAE	N/A	N/A	ECF sigma factor FoxI [Pseudomonas aeruginosa PAO1]	172	Transcriptional regulators	519	foxI	19.9	1	Could Not Be Accurately Determined
36	PA2613	NP_251303	A0A8G2XZB3	N/A	Q9I0M5	Q9I0M5_PSEAE	K07478	N/A	recombination factor protein RarA [Pseudomonas aeruginosa PAO1]	441	Hypothetical unclassified unknown	1326		49	1	0.05
37	PA2617	NP_251307	A0A367M7R1	N/A	Q9I0M1	LFTR_PSEAE	K00684	N/A	leucyl/phenylalanyl-tRNA--protein transferase [Pseudomonas aeruginosa PAO1]	226	Translation post translation modification degradation	681	aat	25.8	1	0.1
38	PA2686	NP_251376	A0A8G6VUQ8	N/A	Q04803	PFER_PSEAE	K19610	Two-component system	two-component response regulator PfeR [Pseudomonas aeruginosa PAO1]	305	Transcriptional regulators,Two component regulatory systems,Two-component System	918	pfeR	34	1	0.08
39	PA2726	NP_251416	O87614	N/A	Q9I0B6	Q9I0B6_PSEAE	K04068	N/A	radical activating enzyme [Pseudomonas aeruginosa PAO1]	212	Central intermediary metabolism	639		23.7	1	Could Not Be Accurately Determined
40	PA2765	NP_251455	A0A8G6VKI2	N/A	Q9I078	Q9I078_PSEAE	K07223	N/A	hypothetical protein PA2765 [Pseudomonas aeruginosa PAO1]	299	Hypothetical unclassified unknown	900		32.4	1	0.03
41	PA2832	NP_251522	A0A8G2RBD4	N/A	Q9I011	TPMT_PSEAE	K00569	N/A	thiopurine S-methyltransferase [Pseudomonas aeruginosa PAO1]	218	Adaptation protection,Nucleotide biosynthesis and metabolism	657	tpm	24.9	1	0.11
42	PA2872	NP_251562	A0A8G3DBS9	N/A	Q9HZX4	Q9HZX4_PSEAE	N/A	N/A	hypothetical protein PA2872 [Pseudomonas aeruginosa PAO1]	256	Hypothetical unclassified unknown	771		28.8	2	0.09
43	PA2895	NP_251585	A0A8G3QAA9	N/A	Q9HZV2	Q9HZV2_PSEAE	N/A	N/A	hypothetical protein PA2895 [Pseudomonas aeruginosa PAO1]	254	Transcriptional regulators	765	sbrR	26.9	1	0.06
44	PA2914	NP_251604	A0A8G4GJZ5	N/A	Q9HZT3	Q9HZT3_PSEAE	K02015	N/A	ABC transporter permease [Pseudomonas aeruginosa PAO1]	343	Membrane proteins,Transport of small molecules	1032		35.5	1	0.07
45	PA2946	NP_251636	A0A069QJN7	N/A	Q9HZQ1	Q9HZQ1_PSEAE	N/A	N/A	hypothetical protein PA2946 [Pseudomonas aeruginosa PAO1]	233	Membrane proteins	1095		39.5	1	0.14
46	PA2957	NP_251647	A0A072ZS40	N/A	Q9HZP1	Q9HZP1_PSEAE	N/A	N/A	transcriptional regulator [Pseudomonas aeruginosa PAO1]	212	Transcriptional regulators	639		25	1	0.09
47	PA2965	NP_251655	A0A4V8DLJ2	N/A	G3XDA2	G3XDA2_PSEAE	K09458	Fatty acid biosynthesis;Biotin metabolism;Metabolic pathways;Fatty acid metabolism;Biosynthesis of cofactors	3-oxoacyl-ACP synthase [Pseudomonas aeruginosa PAO1]	414	Fatty acid and phospholipid metabolism	1245	fabF1	43.5	1	Could Not Be Accurately Determined
48	PA3052	NP_251742	A0A8G6VL47	N/A	Q9HZF6	Q9HZF6_PSEAE	N/A	N/A	hypothetical protein PA3052 [Pseudomonas aeruginosa PAO1]	326	Hypothetical unclassified unknown	981		36.4	1	0.07
49	PA3212	NP_251902	A0A8G7AW06	N/A	Q9HZ28	Q9HZ28_PSEAE	K02065	N/A	ABC transporter ATP-binding protein [Pseudomonas aeruginosa PAO1]	264	Transport of small molecules	795		28.4	1	0.06
50	PA3344	NP_252034	A0A8G8GQX2	N/A	Q9HYQ1	Q9HYQ1_PSEAE	K03654	N/A	ATP-dependent DNA helicase RecQ [Pseudomonas aeruginosa PAO1]	712	DNA replication recombination modification and repair	2139	recQ	79.4	1	0.02
51	PA3365	NP_252055	A0A8F8RF23	N/A	Q51416	AMIB_PSEAE	N/A	N/A	chaperone [Pseudomonas aeruginosa PAO1]	371	Chaperones heatshock protein	1116		42.1	1	Could Not Be Accurately Determined
52	PA3409	NP_252099	A0A8B5A4D5	N/A	Q9HYJ6	Q9HYJ6_PSEAE	K07165	Two-component system	transmembrane sensor [Pseudomonas aeruginosa PAO1]	328	Membrane proteins,Transcriptional regulators	987	hasS	35.5	1	0.05
53	PA3527	NP_252217	A0A2R3IRE1	3.5.2.3	P72170	PYRC_PSEAE	K01465	Pyrimidine metabolism;Metabolic pathways;Biosynthesis of cofactors	dihydroorotase [Pseudomonas aeruginosa PAO1]	348	Nucleotide biosynthesis and metabolism,Pyrimidine metabolism	1047	pyrC	38.4	2	0.14
54	PA3576	NP_252266	A0A4P0UJT7	N/A	Q9HY44	Q9HY44_PSEAE	N/A	N/A	hypothetical protein PA3576 [Pseudomonas aeruginosa PAO1]	140	Hypothetical unclassified unknown	423		14.3	1	Could Not Be Accurately Determined
55	PA3593	NP_252283	A0A8G7N490	N/A	Q9HY33	Q9HY33_PSEAE	K00249	Fatty acid degradation;Valine, leucine and isoleucine degradation;Metabolic pathways;Biosynthesis of secondary metabolites;Fatty acid metabolism	acyl-CoA dehydrogenase [Pseudomonas aeruginosa PAO1]	575	Putative enzymes	1728		64.2	1	0.01
56	PA3654	NP_252344	A0A3M5EXR4	N/A	O82852	PYRH_PSEAE	K09903	Pyrimidine metabolism;Metabolic pathways;Nucleotide metabolism;Biosynthesis of cofactors	uridylate kinase [Pseudomonas aeruginosa PAO1]	245	Nucleotide biosynthesis and metabolism,Pyrimidine metabolism	738	pyrH	26.3	1	0.11
57	PA3706	NP_252395	A0A8G3EZC5	N/A	Q9HXT5	WSPC_PSEAE	K13486	Two-component system	biofilm formation methyltransferase WspC [Pseudomonas aeruginosa PAO1]	422	Adaptation protection,Chemosensory,Chemotaxis,Chemotaxis,Motility	1269	wspC	46.4	1	Could Not Be Accurately Determined
58	PA3749	NP_252438	A0A8G2SZX4	N/A	Q9HXP5	Q9HXP5_PSEAE	N/A	N/A	major facilitator superfamily transporter [Pseudomonas aeruginosa PAO1]	437	Membrane proteins,Transport of small molecules	1314		46.1	1	0.04
59	PA3776	NP_252465	A0A072ZQI9	N/A	Q9HXL9	Q9HXL9_PSEAE	N/A	N/A	transcriptional regulator [Pseudomonas aeruginosa PAO1]	302	Transcriptional regulators	909		32.9	1	0.06
60	PA3864	NP_252553	A0A8H0X002	N/A	Q9HXE2	Q9HXE2_PSEAE	K21829	N/A	transcriptional regulator [Pseudomonas aeruginosa PAO1]	210	Amino acid biosynthesis and metabolism,Transcriptional regulators	633	dauR	23.6	1	0.1
61	PA3867	NP_252556	A0A290YNL3	N/A	Q9HXD9	Q9HXD9_PSEAE	N/A	N/A	DNA invertase [Pseudomonas aeruginosa PAO1]	191	DNA replication recombination modification and repair	576		21.5	1	Could Not Be Accurately Determined
62	PA4021	NP_252710	A0A8G6VDG7	N/A	Q9HX06	Q9HX06_PSEAE	K21405	N/A	transcriptional regulator [Pseudomonas aeruginosa PAO1]	643	Transcriptional regulators	1932	eatR	70.7	1	0.02
63	PA4050	NP_252739	A0A069Q3W4	3.1.3.27	Q9HWX8	Q9HWX8_PSEAE	K01095	Glycerophospholipid metabolism;Metabolic pathways	phosphatidylglycerophosphatase A [Pseudomonas aeruginosa PAO1]	171	Fatty acid and phospholipid metabolism,Glycerolipid metabolism	516	pgpA	19.6	1	0.1
64	PA4055	NP_252744	V6AA82	N/A	Q9HWX3	Q9HWX3_PSEAE	K00793	Riboflavin metabolism;Metabolic pathways;Biosynthesis of secondary metabolites;Biosynthesis of cofactors	riboflavin synthase subunit alpha [Pseudomonas aeruginosa PAO1]	219	Biosynthesis of cofactors, prosthetic groups and carriers,Riboflavin metabolism	660	ribC	23.5	1	0.12
65	PA4169	NP_252858	A0A0C6EX59	N/A	Q9HWL2	Q9HWL2_PSEAE	N/A	N/A	hypothetical protein PA4169 [Pseudomonas aeruginosa PAO1]	142	Hypothetical unclassified unknown	429		15.6	1	0.11
66	PA4180	NP_252869	A0A8F9K042	N/A	Q9HWK1	Q9HWK1_PSEAE	K01652	Valine, leucine and isoleucine biosynthesis;Butanoate metabolism;C5-Branched dibasic acid metabolism;Pantothenate and CoA biosynthesis;Metabolic pathways;Biosynthesis of secondary metabolites;2-Oxocarboxylic acid metabolism;Biosynthesis of amino acids	acetolactate synthase [Pseudomonas aeruginosa PAO1]	547	Amino acid biosynthesis and metabolism	1644		59.8	1	0.03
67	PA4314	NP_253004	A0A069PYB9	3.5.1.10	Q9HW87	Q9HW87_PSEAE	K01433	Glyoxylate and dicarboxylate metabolism;One carbon pool by folate;Metabolic pathways	formyltetrahydrofolate deformylase [Pseudomonas aeruginosa PAO1]	283	Glyoxylate and dicarboxylate metabolism,Nucleotide biosynthesis and metabolism,One carbon pool by folate	852	purU1	32.4	1	0.09
68	PA4477	NP_253167	A0A8G7B1V7	N/A	Q9HVU4	Q9HVU4_PSEAE	K08301	N/A	cytoplasmic axial filament protein [Pseudomonas aeruginosa PAO1]	485	Cell division	1458	cafA	54.7	1	0.03
69	PA4588	NP_253278	A0A8G6ZRK7	N/A	Q9HVJ7	Q9HVJ7_PSEAE	K00262	Arginine biosynthesis;Alanine, aspartate and glutamate metabolism;Nitrogen metabolism;Metabolic pathways;Microbial metabolism in diverse environments	glutamate dehydrogenase [Pseudomonas aeruginosa PAO1]	445	Amino acid biosynthesis and metabolism,Glutamate metabolism,Nitrogen metabolism	1338	gdhA	48.9	2	0.08
70	PA4627	NP_253317	A0A0F6RV60	N/A	Q9HVG4	RSMC_PSEAE	K00564	N/A	16S rRNA methyltransferase [Pseudomonas aeruginosa PAO1]	332	Hypothetical unclassified unknown	999		35.9	1	0.05
71	PA4673	NP_253362	A0A071LGE9	N/A	Q9HVC2	Q9HVC2_PSEAE	K14230	N/A	GTP-dependent nucleic acid-binding protein EngD [Pseudomonas aeruginosa PAO1]	366	Hypothetical unclassified unknown	1101		40.1	1	0.08
72	PA4709	NP_253397	A0A241XYF0	N/A	Q9HV89	Q9HV89_PSEAE	K07225	N/A	hemin degrading factor [Pseudomonas aeruginosa PAO1]	354	Putative enzymes,Transport of small molecules	1065	phuS	39.1	1	0.05
73	PA4835	NP_253522	A0A3M5DGU2	N/A	Q9HUX5	Q9HUX5_PSEAE	K23122	D-Amino acid metabolism;Metabolic pathways	hypothetical protein PA4835 [Pseudomonas aeruginosa PAO1]	433	Membrane proteins	1302	cntM	47.7	4	0.12
74	PA4893	NP_253580	A0A069Q405	N/A	Q9HUS0	UREG_PSEAE	K03189	N/A	urease accessory protein UreG [Pseudomonas aeruginosa PAO1]	204	Biosynthesis of cofactors, prosthetic groups and carriers	615	ureG	22	1	0.07
75	PA5009	NP_253696	O33427	2.7.1.-	Q9HUF7	RFAP_PSEAE	K02848	Lipopolysaccharide biosynthesis;Metabolic pathways	lipopolysaccharide kinase WaaP [Pseudomonas aeruginosa PAO1]	268	Cell wall LPS capsule	807	waaP	31.3	1	0.07
76	PA5019	NP_253706	A0A071L2W9	2.1.1.266	Q9HUF0	Q9HUF0_PSEAE	K07115	N/A	hypothetical protein PA5019 [Pseudomonas aeruginosa PAO1]	278	Hypothetical unclassified unknown	837		31.9	2	0.07
77	PA5050	NP_253737	A0A8G6Y2S0	N/A	Q9HUC9	Q9HUC9_PSEAE	K04066	N/A	primosome assembly protein PriA [Pseudomonas aeruginosa PAO1]	739	DNA replication recombination modification and repair	2220	priA	82.1	1	0.02
78	PA5273	NP_253960	A0A8G7H8F0	N/A	Q9HTS7	Q9HTS7_PSEAE	N/A	N/A	hypothetical protein PA5273 [Pseudomonas aeruginosa PAO1]	237	Hypothetical unclassified unknown	714		25.5	1	0.09
79	PA5279	NP_253966	A0A5E5R478	N/A	G3XD70	G3XD70_PSEAE	K09921	N/A	hypothetical protein PA5279 [Pseudomonas aeruginosa PAO1]	233	Hypothetical unclassified unknown	702		25.8	1	0.08
80	PA5492	NP_254179	A0A071L2E4	N/A	Q9HT81	ENGB_PSEAE	K03978	N/A	ribosome biogenesis GTP-binding protein YsxC [Pseudomonas aeruginosa PAO1]	215	Hypothetical unclassified unknown	648		23.8	1	0.09
81	PA5534	NP_254221	A0A0A8RFQ1	N/A	Q9HT40	Q9HT40_PSEAE	N/A	N/A	hypothetical protein PA5534 [Pseudomonas aeruginosa PAO1]	213	Hypothetical unclassified unknown	642		23.6	1	0.14
82	PA5538	NP_254225	A0A069PZV0	3.5.1.28	Q9HT36	Q9HT36_PSEAE	K01448	Cationic antimicrobial peptide (CAMP) resistance	N-acetylmuramoyl-L-alanine amidase [Pseudomonas aeruginosa PAO1]	397	Cell wall LPS capsule	1194	amiA	42.9	1	0.06
83	PA5541	NP_254228	A0A8G2YAA8	N/A	Q9HT33	Q9HT33_PSEAE	K01465	Pyrimidine metabolism;Metabolic pathways;Biosynthesis of cofactors	dihydroorotase [Pseudomonas aeruginosa PAO1]	445	Nucleotide biosynthesis and metabolism,Pyrimidine metabolism	1338	pyrQ	49.3	1	0.02
84	PA5552	NP_254239	A0A8G2TSA9	N/A	Q9HT22	GLMU_PSEAE	K04042	Amino sugar and nucleotide sugar metabolism;O-Antigen nucleotide sugar biosynthesis;Metabolic pathways;Biosynthesis of nucleotide sugars	bifunctional glucosamine-1-phosphate acetyltransferase/N-acetylglucosamine-1-phosphate uridyltransferase [Pseudomonas aeruginosa PAO1]	454	Aminosugars metabolism,Cell wall LPS capsule	1365	glmU	48.9	1	0.04

## Sheet: AUM_sta
Protein ID	Locus_tag	## Accession	Provided_UniProt_Accessions	Enzyme_Classification_Number	UniProtKB Accession	UniProtKB ID	KEGG_Ortholog	Pathways	Annotation	Sequence_Length	Function	Gene Length	Gene Name	Estimated MW (kDa)	CumulativePartialPeptideSequences	AverageSequenceCoverage
		#													AUM_sta	AUM_sta
1	PA0105	NP_248795	A0A069QCU5	7.1.1.9	Q9I727	Q9I727_PSEAE	K02275	Oxidative phosphorylation;Metabolic pathways	cytochrome C oxidase subunit II [Pseudomonas aeruginosa PAO1]	374	Energy metabolism	1125	coxB	42.2	3	0.14
2	PA0129	NP_248819	A0A072ZG39	N/A	Q9I703	BAUD_PSEAE	K11735	N/A	gamma-aminobutyrate permease [Pseudomonas aeruginosa PAO1]	475	Beta-alanine catabolism,Carbon compound catabolism,Transport of small molecules	1428	bauD	51.3	1	0.02
3	PA0203	NP_248894	A0A8G6XIE1	N/A	Q9I6T5	Q9I6T5_PSEAE	K11069	N/A	ABC transporter [Pseudomonas aeruginosa PAO1]	344	Transport of small molecules	1035	0	37.9	1	Could Not Be Accurately Determined
4	PA0276	NP_248967	A0A077JPG8	N/A	Q9I6L4	Q9I6L4_PSEAE	N/A	N/A	hypothetical protein PA0276 [Pseudomonas aeruginosa PAO1]	171	Membrane proteins	516	0	18.6	1	0.08
5	PA0476	NP_249167	A0A072ZES6	N/A	Q9I642	Q9I642_PSEAE	K03457	N/A	permease [Pseudomonas aeruginosa PAO1]	575	Transport of small molecules	1728	0	61.7	2	0.07
6	PA0540	NP_249231	A0A8G7B1M5	N/A	Q9I5Z6	Q9I5Z6_PSEAE	N/A	N/A	hypothetical protein PA0540 [Pseudomonas aeruginosa PAO1]	128	Hypothetical unclassified unknown	387	0	13.8	1	0.08
7	PA0553	NP_249244	A0A072ZEP5	N/A	Q9I5Y3	Q9I5Y3_PSEAE	N/A	N/A	hypothetical protein PA0553 [Pseudomonas aeruginosa PAO1]	66	Hypothetical unclassified unknown	201	0	7	1	0.32
8	PA0616	NP_249307	A0A431XHB8	N/A	G3XCT9	G3XCT9_PSEAE	N/A	N/A	hypothetical protein PA0616 [Pseudomonas aeruginosa PAO1]	185	Related to phage, transposon, or plasmid	558	0	19.4	1	Could Not Be Accurately Determined
9	PA0633	NP_249324	G8CP46	N/A	G3XD38	G3XD38_PSEAE	N/A	N/A	hypothetical protein PA0633 [Pseudomonas aeruginosa PAO1]	164	Related to phage, transposon, or plasmid	495	0	17.5	1	Could Not Be Accurately Determined
10	PA0636	NP_249327	A0A8G4CZK6	N/A	G3XD57	G3XD57_PSEAE	N/A	N/A	hypothetical protein PA0636 [Pseudomonas aeruginosa PAO1]	611	Related to phage, transposon, or plasmid	1836	0	63.7	1	Could Not Be Accurately Determined
11	PA0668	NP_249359	A0A8G7DC42	N/A	Q9I5Q3	SYY2_PSEAE	K01980	N/A	tyrosine--tRNA ligase [Pseudomonas aeruginosa PAO1]	399	Amino acid biosynthesis and metabolism,Aminoacyl-tRNA biosynthesis,Translation post translation modification degradation,Tryptophan metabolism	1200	tyrZ	44.1	1	0.02
12	PA0751	NP_249442	A0A0A8RMU6	N/A	Q9I5H8	Q9I5H8_PSEAE	K07120	N/A	hypothetical protein PA0751 [Pseudomonas aeruginosa PAO1]	345	Membrane proteins	1038	0	36.9	2	0.1
13	PA0807	NP_249498	A0A069Q4P8	N/A	Q9I5D1	Q9I5D1_PSEAE	K01447	N/A	protein AmpDh3 [Pseudomonas aeruginosa PAO1]	255	Antibiotic resistance and susceptibility	768	ampDh3	28.7	1	0.06
14	PA0904	NP_249595	A0A8G7AMM3	N/A	O69077	AK_PSEAE	K00928	Glycine, serine and threonine metabolism;Monobactam biosynthesis;Cysteine and methionine metabolism;Lysine biosynthesis;Metabolic pathways;Biosynthesis of secondary metabolites;Microbial metabolism in diverse environments;2-Oxocarboxylic acid metabolism;Biosynthesis of amino acids	aspartokinase [Pseudomonas aeruginosa PAO1]	412	Amino acid biosynthesis and metabolism,Glycine, serine and threonine metabolism,Lysine biosynthesis	1239	lysC	44.4	1	0.04
15	PA1007	NP_249698	A0A072ZZC4	N/A	Q9I4W6	Q9I4W6_PSEAE	K03548	N/A	hypothetical protein PA1007 [Pseudomonas aeruginosa PAO1]	357	Membrane proteins	1074	0	40.1	1	0.04
16	PA1190	NP_249881	A0A069Q3Q9	N/A	Q9I4E8	Q9I4E8_PSEAE	N/A	N/A	hypothetical protein PA1190 [Pseudomonas aeruginosa PAO1]	199	Membrane proteins	600	0	21.5	1	0.1
17	PA1214	NP_249905	A0A8G3NJD4	N/A	Q9I4C4	Q9I4C4_PSEAE	N/A	N/A	hypothetical protein PA1214 [Pseudomonas aeruginosa PAO1]	532	Hypothetical unclassified unknown	1599	0	59.3	1	0.02
18	PA1290	NP_249981	A0A8G6SBV4	N/A	Q9I454	Q9I454_PSEAE	N/A	N/A	transcriptional regulator [Pseudomonas aeruginosa PAO1]	197	Transcriptional regulators	594	0	22.4	1	Could Not Be Accurately Determined
19	PA1324	NP_250015	A0A8G3JLD3	N/A	Q9I420	Q9I420_PSEAE	N/A	N/A	hypothetical protein PA1324 [Pseudomonas aeruginosa PAO1]	170	Hypothetical unclassified unknown	513	0	18.3	3	0.25
20	PA1359	NP_250050	A0A0H4P9E4	N/A	Q9I3Y5	Q9I3Y5_PSEAE	N/A	N/A	transcriptional regulator [Pseudomonas aeruginosa PAO1]	218	Transcriptional regulators	657	0	23.9	1	Could Not Be Accurately Determined
21	PA1391	NP_250082	A0A8G2S065	N/A	Q9I3V3	Q9I3V3_PSEAE	N/A	N/A	glycosyl transferase family protein [Pseudomonas aeruginosa PAO1]	591	Putative enzymes	1776	0	65.7	1	0.02
22	PA1413	NP_250104	A0A077K3R0	N/A	Q9I3T1	Q9I3T1_PSEAE	N/A	N/A	transcriptional regulator [Pseudomonas aeruginosa PAO1]	290	Transcriptional regulators	873	0	31.6	1	0.04
23	PA1418	NP_250109	A0A485EQH2	N/A	Q9I3S6	Q9I3S6_PSEAE	K03307	N/A	sodium:solute symport protein [Pseudomonas aeruginosa PAO1]	463	Transport of small molecules	1392	0	49	1	0.02
24	PA1500	NP_250191	A0A8G7A8W5	N/A	Q9I3L2	Q9I3L2_PSEAE	K00042	Glyoxylate and dicarboxylate metabolism;Metabolic pathways	2-hydroxy-3-oxopropionate reductase [Pseudomonas aeruginosa PAO1]	296	Putative enzymes	891	0	30.9	1	Could Not Be Accurately Determined
25	PA1516	NP_250207	A0A8G6GZN3	N/A	Q9I3J7	Q9I3J7_PSEAE	K13485	Purine metabolism;Metabolic pathways	hypothetical protein PA1516 [Pseudomonas aeruginosa PAO1]	171	Hypothetical unclassified unknown	516	0	18.9	1	0.04
26	PA1668	NP_250359	A0A8F2V339	N/A	Q9I357	Q9I357_PSEAE	K11892	N/A	hypothetical protein PA1668 [Pseudomonas aeruginosa PAO1]	289	Protein secretion export apparatus	870	dotU2	32.7	1	Could Not Be Accurately Determined
27	PA1682	NP_250373	A0A069Q2A0	N/A	Q9I343	Q9I343_PSEAE	K05820	N/A	MFS metabolite transporter [Pseudomonas aeruginosa PAO1]	383	Membrane proteins,Transport of small molecules	1152	0	42.1	1	0.03
28	PA1727	NP_250418	A0A8G2RVV1	N/A	Q9I310	Y1727_PSEAE	K21023	N/A	signaling protein [Pseudomonas aeruginosa PAO1]	685	Cell wall LPS capsule,Motility	2058	mucR	74.4	3	0.08
29	PA1854	NP_250545	A0A8G3IKW5	N/A	Q9I2P1	Q9I2P1_PSEAE	K07168	N/A	hypothetical protein PA1854 [Pseudomonas aeruginosa PAO1]	385	Hypothetical unclassified unknown	1158	0	42.1	1	Could Not Be Accurately Determined
30	PA1938	NP_250628	A0A0A8RUB2;A0A8G3T589	N/A	Q9I2G6	Q9I2G6_PSEAE	K07497	N/A	hypothetical protein PA1938 [Pseudomonas aeruginosa PAO1]	273	Related to phage, transposon, or plasmid	822	0	31.9	2	0.04
31	PA2056	NP_250746	A0A077JWL2	N/A	Q9I259	Q9I259_PSEAE	K18900	N/A	transcriptional regulator [Pseudomonas aeruginosa PAO1]	300	Transcriptional regulators	903	0	33.1	2	0.07
32	PA2084	NP_250774	A0A2L1KHZ5	N/A	Q9I231	Q9I231_PSEAE	K01953	Alanine, aspartate and glutamate metabolism;Metabolic pathways;Biosynthesis of secondary metabolites;Biosynthesis of amino acids	asparagine synthetase [Pseudomonas aeruginosa PAO1]	610	Amino acid biosynthesis and metabolism	1833	0	68	1	Could Not Be Accurately Determined
33	PA2108	NP_250798	A0A8G5Q801	N/A	Q9I207	Q9I207_PSEAE	K00156	Pyruvate metabolism;Metabolic pathways	thiamine pyrophosphate protein [Pseudomonas aeruginosa PAO1]	590	Putative enzymes	1773	0	64.3	1	0.01
34	PA2173	NP_250863	A0A509JK46	N/A	Q9I1U2	Q9I1U2_PSEAE	N/A	N/A	hypothetical protein PA2173 [Pseudomonas aeruginosa PAO1]	116	Hypothetical unclassified unknown	351	0	12.5	1	0.09
35	PA2176	NP_250866	A0A8G4Q7F4	N/A	Q9I1T9	Q9I1T9_PSEAE	N/A	N/A	hypothetical protein PA2176 [Pseudomonas aeruginosa PAO1]	196	Hypothetical unclassified unknown	591	0	20.9	1	0.11
36	PA2177	NP_250867	A0A485HQX4	2.7.13.3	Q9I1T8	Q9I1T8_PSEAE	N/A	N/A	sensor/response regulator hybrid protein [Pseudomonas aeruginosa PAO1]	699	Two component regulatory systems,Two-component System	2100	0	76.5	1	0.03
37	PA2294	NP_250984	A0A8G7A1E0	N/A	Q9I1I1	Q9I1I1_PSEAE	K15555	Sulfur metabolism	ABC transporter ATP-binding protein [Pseudomonas aeruginosa PAO1]	284	Transport of small molecules	855	0	31.5	1	Could Not Be Accurately Determined
38	PA2390	NP_251080	A0A8G3VUL4	N/A	Q9I190	MACB_PSEAE	K05685	N/A	pyoverdine biosynthesis protein PvdT [Pseudomonas aeruginosa PAO1]	663	Membrane proteins,Transport of small molecules	1992	pvdT	70.9	1	0.04
39	PA2531	NP_251221	A0A8G7EXK4	N/A	Q9I0V2	Q9I0V2_PSEAE	K00817	Histidine metabolism;Tyrosine metabolism;Phenylalanine metabolism;Phenylalanine, tyrosine and tryptophan biosynthesis;Metabolic pathways;Biosynthesis of secondary metabolites;Biosynthesis of amino acids	aminotransferase [Pseudomonas aeruginosa PAO1]	374	Amino acid biosynthesis and metabolism	1125	0	40.7	1	0.06
40	PA2547	NP_251237	A0A8D9JBS0	N/A	Q9I0T7	Q9I0T7_PSEAE	N/A	N/A	transcriptional regulator [Pseudomonas aeruginosa PAO1]	305	Transcriptional regulators	918	0	33.4	1	Could Not Be Accurately Determined
41	PA2669	NP_251359	A0A2U2Y0U6	N/A	Q9I0G9	Q9I0G9_PSEAE	N/A	N/A	hypothetical protein PA2669 [Pseudomonas aeruginosa PAO1]	194	Hypothetical unclassified unknown	585	0	22.7	1	0.1
42	PA2677	NP_251367	A0A367M6Y8	N/A	Q9I0G1	Q9I0G1_PSEAE	K02454	Biofilm formation - Vibrio cholerae	type II secretion protein [Pseudomonas aeruginosa PAO1]	575	Protein secretion export apparatus	1728	0	63.7	1	Could Not Be Accurately Determined
43	PA2843	NP_251533	A0A8G6V841	N/A	Q9I000	Q9I000_PSEAE	K01626	Phenylalanine, tyrosine and tryptophan biosynthesis;Metabolic pathways;Biosynthesis of secondary metabolites;Biosynthesis of amino acids	aldolase [Pseudomonas aeruginosa PAO1]	448	Putative enzymes	1347	0	49.9	1	0.04
44	PA2874	NP_251564	A0A367MFJ4	N/A	Q9HZX2	Q9HZX2_PSEAE	N/A	N/A	hypothetical protein PA2874 [Pseudomonas aeruginosa PAO1]	317	Hypothetical unclassified unknown	954	0	35.3	1	Could Not Be Accurately Determined
45	PA2883	NP_251573	A0A080VBT8	N/A	Q9HZW4	Q9HZW4_PSEAE	N/A	N/A	hypothetical protein PA2883 [Pseudomonas aeruginosa PAO1]	55	Hypothetical unclassified unknown	168	0	6.3	3	0.69
46	PA2947	NP_251637	A0A231K8H4	N/A	Q9HZQ0	Q9HZQ0_PSEAE	K02189	Porphyrin metabolism;Metabolic pathways;Biosynthesis of cofactors	hypothetical protein PA2947 [Pseudomonas aeruginosa PAO1]	142	Biosynthesis of cofactors, prosthetic groups and carriers,Cobalamin biosynthesis	429	cobE	15.1	1	0.15
47	PA3013	NP_251703	A0A8G2PWT1	N/A	Q9HZJ3	FADA_PSEAE	K00632	Fatty acid degradation;Valine, leucine and isoleucine degradation;Benzoate degradation;alpha-Linolenic acid metabolism;Metabolic pathways;Biosynthesis of secondary metabolites;Microbial metabolism in diverse environments;Fatty acid metabolism	3-ketoacyl-CoA thiolase [Pseudomonas aeruginosa PAO1]	391	Amino acid biosynthesis and metabolism,Bile acid biosynthesis,Fatty acid and phospholipid metabolism,Fatty acid biosynthesis (path 2),Fatty acid metabolism,Phenylalanine metabolism,Valine, leucine and isoleucine degradation	1176	faoB	41.6	1	0.06
48	PA3024	NP_251714	A0A485FDA5	2.7.1.-	Q9HZI2	Q9HZI2_PSEAE	N/A	N/A	carbohydrate kinase [Pseudomonas aeruginosa PAO1]	519	Energy metabolism,Putative enzymes	1560	0	58	2	Could Not Be Accurately Determined
49	PA3029	NP_251719	A0A8G2U660	N/A	Q9HZH7	Q9HZH7_PSEAE	K03638	Folate biosynthesis;Metabolic pathways;Biosynthesis of cofactors	molybdopterin biosynthesis protein B [Pseudomonas aeruginosa PAO1]	179	Biosynthesis of cofactors, prosthetic groups and carriers,Molybdopterin biosynthesis	540	moaB2	19.2	1	0.12
50	PA3111	NP_251801	A0A1V0M5N4	N/A	Q9HZA8	Q9HZA8_PSEAE	K11754	Folate biosynthesis;Metabolic pathways;Biosynthesis of cofactors	folylpolyglutamate synthetase [Pseudomonas aeruginosa PAO1]	429	Biosynthesis of cofactors, prosthetic groups and carriers	1290	folC	46.5	1	Could Not Be Accurately Determined
51	PA3185	NP_251875	A0A8G3A9D0	N/A	Q9HZ52	Q9HZ52_PSEAE	N/A	N/A	hypothetical protein PA3185 [Pseudomonas aeruginosa PAO1]	283	Hypothetical unclassified unknown	852	0	32.3	1	0.06
52	PA3191	NP_251881	A0A8G6VSZ0	N/A	Q9HZ47	Q9HZ47_PSEAE	N/A	N/A	two-component sensor [Pseudomonas aeruginosa PAO1]	473	Two component regulatory systems,Two-component System	1422	gtrS	53	1	0.05
53	PA3222	NP_251912	A0A8G2WGN3	N/A	Q9HZ18	Q9HZ18_PSEAE	N/A	N/A	hypothetical protein PA3222 [Pseudomonas aeruginosa PAO1]	299	Membrane proteins	900	0	31.3	1	0.07
54	PA3415	NP_252105	A0A8G4WNB3	N/A	Q9HYJ0	Q9HYJ0_PSEAE	K09699	Valine, leucine and isoleucine degradation;Propanoate metabolism;Lipoic acid metabolism;Metabolic pathways;Biosynthesis of secondary metabolites	branched-chain alpha-keto acid dehydrogenase subunit E2 [Pseudomonas aeruginosa PAO1]	370	Energy metabolism	1113	0	39.5	1	0.05
55	PA3416	NP_252106	A0A069QA02	N/A	Q9HYI9	Q9HYI9_PSEAE	K00167	Valine, leucine and isoleucine degradation;Propanoate metabolism;Lipoic acid metabolism;Metabolic pathways;Biosynthesis of secondary metabolites	pyruvate dehydrogenase E1 component subunit beta [Pseudomonas aeruginosa PAO1]	333	Energy metabolism	1002	0	36.1	1	0.04
56	PA3534	NP_252224	A0A8G5G643	N/A	Q9HY76	Q9HY76_PSEAE	N/A	N/A	oxidoreductase [Pseudomonas aeruginosa PAO1]	702	Putative enzymes	2109	0	76.8	1	0.01
57	PA3672	NP_252362	A0A2C9WYR3	N/A	Q9HXW8	Q9HXW8_PSEAE	K25152	N/A	ABC transporter ATP-binding protein [Pseudomonas aeruginosa PAO1]	307	Transport of small molecules	924	0	33.5	5	0.27
58	PA3687	NP_252377	A0A7M3AXA8	4.1.1.31	Q9HXV3	CAPP_PSEAE	K01595	Pyruvate metabolism;Methane metabolism;Carbon fixation in photosynthetic organisms;Carbon fixation pathways in prokaryotes;Metabolic pathways;Microbial metabolism in diverse environments;Carbon metabolism	phosphoenolpyruvate carboxylase [Pseudomonas aeruginosa PAO1]	878	Carbon fixation,Central intermediary metabolism,Energy metabolism,Pyruvate metabolism,Reductive carboxylate cycle (CO2 fixation)	2637	ppc	97.8	1	0.02
59	PA3713	NP_252402	A0A8B5BD73	N/A	Q9HXS8	Q9HXS8_PSEAE	K00316	Arginine and proline metabolism;beta-Alanine metabolism;Metabolic pathways	spermidine dehydrogenase SpdH [Pseudomonas aeruginosa PAO1]	620	Hypothetical unclassified unknown	1863	spdH	68.9	1	Could Not Be Accurately Determined
60	PA3777	NP_252466	A0A8G6VYR2	N/A	Q9HXL8	EX7L_PSEAE	K03601	N/A	exodeoxyribonuclease VII large subunit [Pseudomonas aeruginosa PAO1]	459	DNA replication recombination modification and repair	1380	xseA	51.2	1	0.04
61	PA3781	NP_252470	A0A8G6VX60	N/A	Q9HXL4	Q9HXL4_PSEAE	K21393	N/A	transporter [Pseudomonas aeruginosa PAO1]	426	Membrane proteins,Transport of small molecules	1281	0	45	1	0.02
62	PA3862	NP_252551	A0A6A9K4S6	N/A	Q9HXE4	Q9HXE4_PSEAE	K19744	D-Amino acid metabolism;Metabolic pathways	NAD(P)H-dependent anabolic L-arginine dehydrogenase DauB [Pseudomonas aeruginosa PAO1]	315	Amino acid biosynthesis and metabolism	948	dauB	33.9	1	0.06
63	PA3888	NP_252577	A0A072ZD71	N/A	Q9HXC5	Q9HXC5_PSEAE	K05846	N/A	ABC transporter permease [Pseudomonas aeruginosa PAO1]	240	Membrane proteins,Transport of small molecules	723	opuCD	25.1	2	0.13
64	PA3946	NP_252635	A0A8G2S528	N/A	Q9HX70	Q9HX70_PSEAE	K07679	Two-component system;Pertussis	two-component sensor [Pseudomonas aeruginosa PAO1]	1212	Two component regulatory systems,Two-component System	3639	rocS1	134.7	1	Could Not Be Accurately Determined
65	PA3981	NP_252670	A0A072ZQ48	N/A	Q9HX38	Q9HX38_PSEAE	K06217	N/A	hypothetical protein PA3981 [Pseudomonas aeruginosa PAO1]	340	Hypothetical unclassified unknown	1023	0	38.4	1	0.07
66	PA4069	NP_252758	A0A8G3PR21	N/A	Q9HWV9	Q9HWV9_PSEAE	K00067	Streptomycin biosynthesis;Polyketide sugar unit biosynthesis;O-Antigen nucleotide sugar biosynthesis;Metabolic pathways;Biosynthesis of secondary metabolites;Biosynthesis of nucleotide sugars	hypothetical protein PA4069 [Pseudomonas aeruginosa PAO1]	294	Hypothetical unclassified unknown	885	0	32.9	1	0.05
67	PA4152	NP_252841	A0A8G5N749	N/A	Q9HWM9	Q9HWM9_PSEAE	K00627	Glycolysis / Gluconeogenesis;Citrate cycle (TCA cycle);Pyruvate metabolism;Lipoic acid metabolism;Metabolic pathways;Biosynthesis of secondary metabolites;Microbial metabolism in diverse environments;Carbon metabolism	branched-chain alpha-keto acid dehydrogenase subunit E2 [Pseudomonas aeruginosa PAO1]	370	Carbon compound catabolism	1113	0	40.3	1	0.02
68	PA4168	NP_252857	A0A8G6DGM4	N/A	Q9HWL3	Q9HWL3_PSEAE	K16088	N/A	second ferric pyoverdine receptor FpvB [Pseudomonas aeruginosa PAO1]	802	Transport of small molecules	2409	fpvB	87.4	5	0.09
69	PA4327	NP_253017	A0A8F9JFA9	N/A	Q9HW74	Q9HW74_PSEAE	N/A	N/A	hypothetical protein PA4327 [Pseudomonas aeruginosa PAO1]	268	Hypothetical unclassified unknown	807	0	30.6	1	0.04
70	PA4338	NP_253028	A0A0A8RM86	N/A	Q9HW63	Q9HW63_PSEAE	N/A	N/A	acyltransferase [Pseudomonas aeruginosa PAO1]	426	Membrane proteins	1281	0	48.3	1	0.03
71	PA4443	NP_253133	A0A0A8RHF3	2.7.7.4	O50273	CYSD_PSEAE	K00957	Purine metabolism;Monobactam biosynthesis;Sulfur metabolism;Metabolic pathways;Biosynthesis of secondary metabolites;Microbial metabolism in diverse environments	sulfate adenylyltransferase subunit 2 [Pseudomonas aeruginosa PAO1]	305	Amino acid biosynthesis and metabolism,Central intermediary metabolism	918	cysD	35.5	1	0.1
72	PA4445	NP_253135	A0A072ZEI0	N/A	Q9HVX2	GTPC1_PSEAE	N/A	N/A	hypothetical protein PA4445 [Pseudomonas aeruginosa PAO1]	252	Hypothetical unclassified unknown	759	0	27.4	1	0.08
73	PA4483	NP_253173	A0A072ZEK0	6.3.5.7	Q9HVT8	GATA_PSEAE	K02433	Metabolic pathways	aspartyl/glutamyl-tRNA amidotransferase subunit A [Pseudomonas aeruginosa PAO1]	484	Translation post translation modification degradation	1455	gatA	51.9	1	0.03
74	PA4500	NP_253190	A0A8G6XFX2	N/A	Q9HVS1	Q9HVS1_PSEAE	K12368	N/A	ABC transporter [Pseudomonas aeruginosa PAO1]	533	Transport of small molecules	1602	dppA3	59.7	1	Could Not Be Accurately Determined
75	PA4515	NP_253205	A0A431X9C2	1.14.11.-	Q9HVQ7	PIUC_PSEAE	K07336	N/A	hydroxylase [Pseudomonas aeruginosa PAO1]	226	Hypothetical unclassified unknown	681	0	25.6	1	0.07
76	PA4522	NP_253212	A0A8G2TER8	N/A	G3XCW9	G3XCW9_PSEAE	K03806	N/A	N-acetyl-anhydromuranmyl-L-alanine amidase [Pseudomonas aeruginosa PAO1]	188	Cell wall LPS capsule	567	ampD	21	1	Could Not Be Accurately Determined
77	PA4548	NP_253238	A0A8G6W5M0	N/A	P33642	Y4548_PSEAE	K03153	Thiamine metabolism;Metabolic pathways;Biosynthesis of cofactors	D-amino acid oxidase [Pseudomonas aeruginosa PAO1]	364	Amino acid biosynthesis and metabolism	1095	0	39.4	1	0.06
78	PA4599	NP_253289	A0A385FVV6	N/A	G3XD25	G3XD25_PSEAE	K18295	N/A	resistance-nodulation-cell division (RND) multidrug efflux membrane fusion protein MexC [Pseudomonas aeruginosa PAO1]	387	Antibiotic resistance and susceptibility,Transport of small molecules	1164	mexC	40.8	1	Could Not Be Accurately Determined
79	PA4814	NP_253501	A0A659BEI2	N/A	Q9HUZ6	Q9HUZ6_PSEAE	K00219	N/A	2,4-dienoyl-CoA reductase [Pseudomonas aeruginosa PAO1]	681	Fatty acid and phospholipid metabolism	2046	fadH2	74.6	1	Could Not Be Accurately Determined
80	PA4862	NP_253549	V6AE58	N/A	Q9HUV1	Q9HUV1_PSEAE	K11963	N/A	ABC transporter ATP-binding protein [Pseudomonas aeruginosa PAO1]	232	Transport of small molecules	699	0	25.6	1	Could Not Be Accurately Determined
81	PA4949	NP_253636	A0A8G4NLX3	N/A	Q9HUL5	Q9HUL5_PSEAE	K23997	N/A	hypothetical protein PA4949 [Pseudomonas aeruginosa PAO1]	502	Hypothetical unclassified unknown	1509	0	51.5	2	0.05
82	PA4965	NP_253652	A0A0A8RIW8	N/A	Q9HUK0	Q9HUK0_PSEAE	K06985	N/A	hypothetical protein PA4965 [Pseudomonas aeruginosa PAO1]	174	Hypothetical unclassified unknown	525	0	18.8	1	0.1
83	PA5036	NP_253723	A0A8G2NIX6	N/A	Q9HUD5	Q9HUD5_PSEAE	K00265	Alanine, aspartate and glutamate metabolism;Nitrogen metabolism;Metabolic pathways;Biosynthesis of secondary metabolites;Microbial metabolism in diverse environments;Biosynthesis of amino acids	glutamate synthase subunit alpha [Pseudomonas aeruginosa PAO1]	1481	Amino acid biosynthesis and metabolism,Glutamate metabolism,Nitrogen metabolism	4446	gltB	161.6	1	0.01
84	PA5216	NP_253903	A0A2R3ISR4	N/A	Q9HTX4	Q9HTX4_PSEAE	K02011	N/A	iron ABC transporter substrate-binding protein [Pseudomonas aeruginosa PAO1]	539	Membrane proteins,Transport of small molecules	1620	0	58.5	1	0.02
85	PA5544	NP_254231	A0A2R3J2U4	N/A	Q9HT30	Q9HT30_PSEAE	N/A	N/A	hypothetical protein PA5544 [Pseudomonas aeruginosa PAO1]	674	Membrane proteins	2025	0	72.1	1	0.02
86	PA5569	NP_254256	A0A069PZE7	3.1.26.5	Q9HT05	RNPA_PSEAE	K03536	N/A	ribonuclease P [Pseudomonas aeruginosa PAO1]	135	Translation post translation modification degradation	408	rnpA	15.3	2	0.11

## Sheet: LB_log
Protein ID	Locus_Tag	## Accession	Provided_UniProt_Accessions	Enzyme_Classification_Number	UniProtKB Accession	UniProtKB ID	KEGG_Ortholog	Pathways	Annotation	Sequence_Length	Function	Gene Length	Gene Name	Estimated MW (kDa)	CumulativePartialPeptideSequences	AverageSequenceCoverage
															LB_log	LB_log
1	PA0009	NP_064729	A0A072ZS90	6.1.1.14	Q9I7B7	SYGA_PSEAE	K01878	N/A	glycine--tRNA ligase subunit alpha [Pseudomonas aeruginosa PAO1]	315	Amino acid biosynthesis and metabolism,Aminoacyl-tRNA biosynthesis,Glycine, serine and threonine metabolism,Translation post translation modification degradation	948	glyQ	36.1	1	0.04
2	PA0018	NP_248708	A0A7M2ZRZ0	2.1.2.9	O85732	FMT_PSEAE	K00604	One carbon pool by folate;Metabolic pathways	methionyl-tRNA formyltransferase [Pseudomonas aeruginosa PAO1]	314	Amino acid biosynthesis and metabolism,Aminoacyl-tRNA biosynthesis,Methionine metabolism,One carbon pool by folate,Translation post translation modification degradation	945	fmt	33	1	0.07
3	PA0019	NP_248709	A0A072ZS98	3.5.1.88	Q9I7A8	DEF_PSEAE	K01462	N/A	peptide deformylase [Pseudomonas aeruginosa PAO1]	168	Translation post translation modification degradation	507	def	19.4	1	0.08
4	PA0047	NP_248737	A0A8G4A735	N/A	Q9I785	Q9I785_PSEAE	N/A	N/A	hypothetical protein PA0047 [Pseudomonas aeruginosa PAO1]	169	Hypothetical unclassified unknown	510	0	17.5	1	0.12
5	PA0071	NP_248761	A0A8B4ZW95	N/A	Q9I761	Q9I761_PSEAE	N/A	N/A	hypothetical protein PA0071 [Pseudomonas aeruginosa PAO1]	570	Hcp secretion island I (HSI-I) type VI secretion system,Protein secretion export apparatus	1713	tagR1	61.9	4	0.13
6	PA0079	NP_248769	A0A069QKX2	N/A	Q9I753	Q9I753_PSEAE	K11893	N/A	hypothetical protein PA0079 [Pseudomonas aeruginosa PAO1]	444	Hcp secretion island I (HSI-I) type VI secretion system,Protein secretion export apparatus	1335	tssK1	48.3	2	0.09
7	PA0081	NP_248771	A0A0A8RAR0	N/A	Q9I751	Q9I751_PSEAE	K11913	N/A	Fha domain-containing protein [Pseudomonas aeruginosa PAO1]	497	Protein secretion export apparatus	1494	fha1	53.3	2	0.05
8	PA0121	NP_248811	A0A2U2XZ19	N/A	Q9I711	Q9I711_PSEAE	N/A	N/A	hypothetical protein PA0121 [Pseudomonas aeruginosa PAO1]	244	Hypothetical unclassified unknown	735	0	26.4	1	0.06
9	PA0162	NP_248852	A0A0K3A909	N/A	Q9I6X0	Q9I6X0_PSEAE	N/A	N/A	histidine porin OpdC [Pseudomonas aeruginosa PAO1]	444	Membrane proteins,Transport of small molecules	1335	opdC	48.9	5	0.18
10	PA0165	NP_248855	A0A069QCM7	N/A	Q9I6W7	Q9I6W7_PSEAE	N/A	N/A	hypothetical protein PA0165 [Pseudomonas aeruginosa PAO1]	278	Hypothetical unclassified unknown	837	0	31.4	1	0.06
11	PA0214	NP_248905	A0A8G5RDI2	N/A	Q9I6S4	Q9I6S4_PSEAE	K13935	N/A	acyl transferase [Pseudomonas aeruginosa PAO1]	310	Carbon compound catabolism	933	0	32.7	1	0.03
12	PA0257	NP_248948	A0A8F9JN90	N/A	Q9I6N2	Q9I6N2_PSEAE	K07497	N/A	hypothetical protein PA0257 [Pseudomonas aeruginosa PAO1]	263	Related to phage, transposon, or plasmid	792	0	30.6	1	0.03
13	PA0287	NP_248978	A0A8F8R848	N/A	Q9I6K3	Q9I6K3_PSEAE	K03307	N/A	3-guanidinopropionate transporter [Pseudomonas aeruginosa PAO1]	461	Transport of small molecules	1386	gpuP	48.5	1	0.02
14	PA0300	NP_248991	A0A0A8RBP8	N/A	Q9I6J1	SPUD_PSEAE	K11073	N/A	putrescine ABC transporter substrate-binding protein SpuD [Pseudomonas aeruginosa PAO1]	367	Transport of small molecules	1104	spuD	40.6	1	0.04
15	PA0352	NP_249043	A0A072ZF70	N/A	Q9I6E1	Q9I6E1_PSEAE	K16345	N/A	transporter [Pseudomonas aeruginosa PAO1]	461	Membrane proteins,Transport of small molecules	1386	0	47.9	1	0.02
16	PA0381	NP_249072	A0A2R3ILM8	2.8.1.10	Q9I6B4	THIG_PSEAE	K03149	Thiamine metabolism;Metabolic pathways;Biosynthesis of cofactors	thiazole synthase [Pseudomonas aeruginosa PAO1]	265	Biosynthesis of cofactors, prosthetic groups and carriers,Thiamine metabolism	798	thiG	28.2	1	0.07
17	PA0392	NP_249083	A0A8G3BJE3	N/A	P25254	Y392_PSEAE	K02221	N/A	hypothetical protein PA0392 [Pseudomonas aeruginosa PAO1]	197	Hypothetical unclassified unknown	594	0	21.7	2	0.12
18	PA0395	NP_249086	A0A509J801	N/A	P24559	PILT_PSEAE	K02669	N/A	twitching motility protein PilT [Pseudomonas aeruginosa PAO1]	344	Cell wall LPS capsule,Motility,Pilin biosynthesis	1035	pilT	38	1	0.03
19	PA0438	NP_249129	A0A069QA14	N/A	Q9I679	Q9I679_PSEAE	K10974	N/A	cytosine permease [Pseudomonas aeruginosa PAO1]	416	Nucleotide biosynthesis and metabolism,Transport of small molecules	1251	codB	43	1	0.04
20	PA0469	NP_249160	A0A072ZG07	N/A	Q9I649	Q9I649_PSEAE	N/A	N/A	hypothetical protein PA0469 [Pseudomonas aeruginosa PAO1]	285	Hypothetical unclassified unknown	858	0	32.1	1	0.06
21	PA0485	NP_249176	A0A080VPX1	N/A	Q9I633	Y485_PSEAE	K05786	N/A	hypothetical protein PA0485 [Pseudomonas aeruginosa PAO1]	298	Membrane proteins	897	0	33.4	1	0.03
22	PA0494	NP_249185	A0A8G2PUB9	N/A	Q9I624	Q9I624_PSEAE	K01961	Fatty acid biosynthesis;Pyruvate metabolism;Propanoate metabolism;Carbon fixation pathways in prokaryotes;Metabolic pathways;Biosynthesis of secondary metabolites;Microbial metabolism in diverse environments;Carbon metabolism;Fatty acid metabolism	acetyl-CoA carboxylase biotin carboxylase subunit [Pseudomonas aeruginosa PAO1]	458	Putative enzymes	1377	0	50.1	1	0.03
23	PA0523	NP_249214	A0A071KU93	N/A	Q59646	NORC_PSEAE	K02305	Nitrogen metabolism;Metabolic pathways;Microbial metabolism in diverse environments	nitric oxide reductase subunit C [Pseudomonas aeruginosa PAO1]	146	Denitrification,Energy metabolism	441	norC	16.3	2	0.22
24	PA0524	NP_249215	A0A8G7TK77	N/A	Q59647	NORB_PSEAE	K04561	Nitrogen metabolism;Metabolic pathways;Microbial metabolism in diverse environments	nitric oxide reductase subunit B [Pseudomonas aeruginosa PAO1]	466	Denitrification,Energy metabolism	1401	norB	52.3	3	0.07
25	PA0561	NP_249252	A0A0H2ZLH9	N/A	Q9I5X5	Q9I5X5_PSEAE	N/A	N/A	hypothetical protein PA0561 [Pseudomonas aeruginosa PAO1]	384	Hypothetical unclassified unknown	1155	0	44.1	1	0.04
26	PA0581	NP_249272	A0A069QA39	N/A	Q9I5V6	PLSY_PSEAE	K08591	Glycerolipid metabolism;Glycerophospholipid metabolism;Metabolic pathways;Biosynthesis of secondary metabolites	glycerol-3-phosphate acyltransferase PlsY [Pseudomonas aeruginosa PAO1]	189	Hypothetical unclassified unknown	570	0	20.2	2	0.11
27	PA0606	NP_249297	A0A069QIR4	N/A	Q9I5T2	Q9I5T2_PSEAE	K02053	N/A	ABC transporter permease [Pseudomonas aeruginosa PAO1]	276	Membrane proteins,Transport of small molecules	831	agtD	29.8	1	0.05
28	PA0614	NP_249305	A0A0H2ZLN2	N/A	Q9I5T0	Q9I5T0_PSEAE	N/A	N/A	hypothetical protein PA0614 [Pseudomonas aeruginosa PAO1]	149	Hypothetical unclassified unknown	450	0	15.5	1	0.07
29	PA0620	NP_249311	A0A8G5M5K0	N/A	G3XD71	G3XD71_PSEAE	N/A	N/A	bacteriophage protein [Pseudomonas aeruginosa PAO1]	691	Related to phage, transposon, or plasmid	2076	0	72.3	1	0.03
30	PA0641	NP_249332	A0A8G1QAS4	N/A	Q9I5S5	Q9I5S5_PSEAE	N/A	N/A	bacteriophage protein [Pseudomonas aeruginosa PAO1]	1204	Related to phage, transposon, or plasmid	3615	0	130.8	1	0.01
31	PA0654	NP_249345	A0A069Q9S2	4.1.1.50	Q9I5R7	SPED_PSEAE	K01611	Cysteine and methionine metabolism;Arginine and proline metabolism;Metabolic pathways	S-adenosylmethionine decarboxylase [Pseudomonas aeruginosa PAO1]	264	Central intermediary metabolism	795	speD	30.4	1	0.05
32	PA0665	NP_249356	A0A071KZB2	N/A	Q9I5Q6	ERPA_PSEAE	K15724	N/A	iron-sulfur cluster insertion protein ErpA [Pseudomonas aeruginosa PAO1]	116	Hypothetical unclassified unknown	351	0	12.5	1	0.16
33	PA0736	NP_249427	A0A8G7JTE5	N/A	Q9I5J3	Q9I5J3_PSEAE	N/A	N/A	hypothetical protein PA0736 [Pseudomonas aeruginosa PAO1]	358	Membrane proteins	1077	0	40	3	0.08
34	PA0799	NP_249490	A0A8G7JUD9	N/A	Q9I5D9	Q9I5D9_PSEAE	N/A	N/A	helicase [Pseudomonas aeruginosa PAO1]	663	Putative enzymes	1992	0	75	1	0.01
35	PA0830	NP_249521	A0A8G2VHD7	N/A	Q9I5A9	Q9I5A9_PSEAE	K07044	N/A	hypothetical protein PA0830 [Pseudomonas aeruginosa PAO1]	277	Hypothetical unclassified unknown	834	0	32.5	1	0.04
36	PA0842	NP_249533	A0A8G4DWC3	N/A	Q9I598	Q9I598_PSEAE	N/A	N/A	glycosyl transferase family protein [Pseudomonas aeruginosa PAO1]	406	Putative enzymes	1221	0	45.1	1	Could Not Be Accurately Determined
37	PA0889	NP_249580	A0A071L1I2	N/A	Q9I557	Q9I557_PSEAE	K10024	N/A	arginine/ornithine ABC transporter permease AotQ [Pseudomonas aeruginosa PAO1]	229	Membrane proteins,Transport of small molecules	690	aotQ	25.1	1	0.03
38	PA0916	NP_249607	A0A8G4GIX8	N/A	Q9I541	RIMO_PSEAE	K14441	N/A	ribosomal protein S12 methylthiotransferase RimO [Pseudomonas aeruginosa PAO1]	440	Hypothetical unclassified unknown	1323	0	49	1	0.07
39	PA0925	NP_249616	A0A8G4UDF7	N/A	Q9I532	Q9I532_PSEAE	K03668	N/A	hypothetical protein PA0925 [Pseudomonas aeruginosa PAO1]	135	Hypothetical unclassified unknown	408	0	15	1	0.15
40	PA0933	NP_249624	A0A8G3D9V3	N/A	Q9I525	RLMD_PSEAE	K03215	N/A	23S rRNA (uracil(1939)-C(5))-methyltransferase RlmD [Pseudomonas aeruginosa PAO1]	450	Translation post translation modification degradation	1353	ygcA	49.1	1	0.02
41	PA0948	NP_249639	A0A8A9AQ47	N/A	Q9I510	Q9I510_PSEAE	N/A	N/A	hypothetical protein PA0948 [Pseudomonas aeruginosa PAO1]	139	Hypothetical unclassified unknown	420	0	15.6	1	0.09
42	PA1044	NP_249735	A0A0D7N171	N/A	Q9I4T0	Q9I4T0_PSEAE	N/A	N/A	hypothetical protein PA1044 [Pseudomonas aeruginosa PAO1]	154	Membrane proteins	465	0	16.9	1	0.1
43	PA1054	NP_249745	A0A0A8RJA3	N/A	Q9I4S0	Q9I4S0_PSEAE	K05559	N/A	monovalent cation/H+ antiporter subunit A [Pseudomonas aeruginosa PAO1]	933	Membrane proteins,Putative enzymes,Transport of small molecules	2802	shaA	99.6	3	0.04
44	PA1059	NP_249750	A0A071L195	N/A	Q9I4R5	Q9I4R5_PSEAE	K05564	N/A	monovalent cation/H+ antiporter subunit G [Pseudomonas aeruginosa PAO1]	115	Membrane proteins,Transport of small molecules	348	shaF	12.5	1	0.1
45	PA1090	NP_249781	A0A0C7D3Y3	N/A	Q9I4N9	Q9I4N9_PSEAE	N/A	N/A	hypothetical protein PA1090 [Pseudomonas aeruginosa PAO1]	220	Hypothetical unclassified unknown	663	0	24.7	1	0.06
46	PA1095	NP_249786	A0A0H2Z6T1	N/A	Q9I4N6	FLISB_PSEAE	K02422	N/A	B-type flagellar protein FliS [Pseudomonas aeruginosa PAO1]	126	Hypothetical unclassified unknown	381	0	13.8	2	0.24
47	PA1126	NP_249817	A0A8G2RYG7	N/A	Q9I4K9	Q9I4K9_PSEAE	N/A	N/A	hypothetical protein PA1126 [Pseudomonas aeruginosa PAO1]	195	Membrane proteins	588	0	21.8	1	0.05
48	PA1159	NP_249850	A0A0H2Z6Y0	N/A	Q9I4H8	Q9I4H8_PSEAE	K03704	N/A	cold-shock protein [Pseudomonas aeruginosa PAO1]	69	Adaptation protection,Transcriptional regulators	210	0	7.7	3	0.45
49	PA1161	NP_249852	A0A8G6W451	N/A	Q9I4H6	Q9I4H6_PSEAE	K00563	N/A	rRNA methyltransferase [Pseudomonas aeruginosa PAO1]	267	Transcription RNA processing and degradation	804	rrmA	29.6	2	0.11
50	PA1192	NP_249883	A0A8G8GR25	N/A	Q9I4E6	TTCA_PSEAE	K14058	N/A	tRNA 2-thiocytidine biosynthesis protein TtcA [Pseudomonas aeruginosa PAO1]	274	Hypothetical unclassified unknown	825	0	31.3	2	0.09
51	PA1251	NP_249942	A0A8I1JUE2	N/A	Q9I493	Q9I493_PSEAE	K03406	Two-component system	chemotaxis transducer [Pseudomonas aeruginosa PAO1]	541	Adaptation protection,Chemotactic transducer (MCP),Chemotaxis	1626	0	58.5	2	0.05
52	PA1276	NP_249967	A0A8D9JH05	N/A	Q9I468	COBC_PSEAE	K02225	Porphyrin metabolism;Metabolic pathways;Biosynthesis of cofactors	threonine-phosphate decarboxylase [Pseudomonas aeruginosa PAO1]	331	Biosynthesis of cofactors, prosthetic groups and carriers,Cobalamin biosynthesis	996	cobC	36.7	1	Could Not Be Accurately Determined
53	PA1312	NP_250003	A0A5E8UPG6	N/A	Q9I432	Q9I432_PSEAE	N/A	N/A	transcriptional regulator [Pseudomonas aeruginosa PAO1]	303	Transcriptional regulators	912	0	33.1	1	Could Not Be Accurately Determined
54	PA1336	NP_250027	A0A3S0S9A2	2.7.13.3	Q9I408	Q9I408_PSEAE	K17060	Two-component system	two-component sensor [Pseudomonas aeruginosa PAO1]	633	Two component regulatory systems,Two-component System	1902	aauS	69.9	1	0.02
55	PA1343	NP_250034	A0A072ZIH8	N/A	Q9I401	Q9I401_PSEAE	N/A	N/A	hypothetical protein PA1343 [Pseudomonas aeruginosa PAO1]	152	Hypothetical unclassified unknown	459	0	16.8	1	0.09
56	PA1346	NP_250037	A0A3M5EM97	N/A	Q9I3Z8	Q9I3Z8_PSEAE	N/A	N/A	hypothetical protein PA1346 [Pseudomonas aeruginosa PAO1]	515	Hypothetical unclassified unknown	1548	0	56.3	1	Could Not Be Accurately Determined
57	PA1379	NP_250070	A0A0A8RTR0	N/A	Q9I3W5	Q9I3W5_PSEAE	N/A	N/A	short-chain dehydrogenase [Pseudomonas aeruginosa PAO1]	277	Putative enzymes	834	0	29.7	1	Could Not Be Accurately Determined
58	PA1434	NP_250125	A0A8I0ZPV2	N/A	Q9I3R3	Q9I3R3_PSEAE	N/A	N/A	hypothetical protein PA1434 [Pseudomonas aeruginosa PAO1]	237	Hypothetical unclassified unknown	714	0	26.3	1	Could Not Be Accurately Determined
59	PA1450	NP_250141	A0A8G7N3C1	N/A	Q9I3Q1	Q9I3Q1_PSEAE	K06872	N/A	hypothetical protein PA1450 [Pseudomonas aeruginosa PAO1]	419	Hypothetical unclassified unknown	1260	0	44.5	1	0.04
60	PA1451	NP_250142	A0A1C7BPA1	N/A	Q9I3Q0	Q9I3Q0_PSEAE	K06872	N/A	hypothetical protein PA1451 [Pseudomonas aeruginosa PAO1]	447	Hypothetical unclassified unknown	1344	0	46.6	1	0.03
61	PA1489	NP_250180	A0A0A8RPS9	N/A	Q9I3M3	Q9I3M3_PSEAE	K00111	Glycerophospholipid metabolism;Biosynthesis of secondary metabolites	hypothetical protein PA1489 [Pseudomonas aeruginosa PAO1]	396	Hypothetical unclassified unknown	1191	0	43.6	1	0.05
62	PA1510	NP_250201	A0A8G3ST94	N/A	Q9I3K2	Q9I3K2_PSEAE	N/A	N/A	hypothetical protein PA1510 [Pseudomonas aeruginosa PAO1]	569	Secreted factors (toxins, enzymes, alginate)	1710	tplE	63.3	1	0.01
63	PA1633	NP_250324	A0A485EQF4	N/A	P57683	ATKA_PSEAE	K01546	Two-component system	potassium-transporting ATPase subunit A [Pseudomonas aeruginosa PAO1]	564	Transport of small molecules	1695	kdpA	59.9	1	0.02
64	PA1634	NP_250325	A0A8G7I9W3	N/A	P57698	ATKB_PSEAE	K01547	Two-component system	potassium-transporting ATPase subunit B [Pseudomonas aeruginosa PAO1]	690	Transport of small molecules	2073	kdpB	73	4	0.1
65	PA1644	NP_250335	A0A071LCG6	N/A	Q9I381	Q9I381_PSEAE	N/A	N/A	hypothetical protein PA1644 [Pseudomonas aeruginosa PAO1]	202	Hypothetical unclassified unknown	609	0	21.8	1	0.07
66	PA1759	NP_250450	A0A7M3A156	N/A	Q9I2Y0	Q9I2Y0_PSEAE	K03556	N/A	transcriptional regulator [Pseudomonas aeruginosa PAO1]	901	Transcriptional regulators	2706	0	101.1	1	0.02
67	PA1768	NP_250459	A0A0A8RQS8	N/A	Q9I2X1	Q9I2X1_PSEAE	N/A	N/A	hypothetical protein PA1768 [Pseudomonas aeruginosa PAO1]	179	Hypothetical unclassified unknown	540	0	19.7	1	0.11
68	PA1771	NP_250462	A0A659BFW2	N/A	Q9I2W8	Q9I2W8_PSEAE	N/A	N/A	hydrolase [Pseudomonas aeruginosa PAO1]	336	Putative enzymes	1011	estX	36.9	2	0.09
69	PA1826	NP_250517	A0A2R3INB9	N/A	Q9I2R9	Q9I2R9_PSEAE	N/A	N/A	transcriptional regulator [Pseudomonas aeruginosa PAO1]	301	Transcriptional regulators	906	0	33.5	2	0.05
70	PA1876	NP_250567	A0A8G3SW40	N/A	Q9I2M1	Q9I2M1_PSEAE	K12541	N/A	ABC transporter ATP-binding protein/permease [Pseudomonas aeruginosa PAO1]	723	Antibiotic resistance and susceptibility,Protein secretion export apparatus,Secreted factors (toxins, enzymes, alginate),Transport of small molecules	2172	0	78.2	2	Could Not Be Accurately Determined
71	PA2094	NP_250784	A0A6H1Q9X1	N/A	Q9I221	Q9I221_PSEAE	K07165	Two-component system	transmembrane sensor [Pseudomonas aeruginosa PAO1]	318	Membrane proteins,Transcriptional regulators	957	0	34.9	1	Could Not Be Accurately Determined
72	PA2111	NP_250801	A0A8D9JEE1	N/A	Q9I204	Q9I204_PSEAE	N/A	N/A	hypothetical protein PA2111 [Pseudomonas aeruginosa PAO1]	237	Hypothetical unclassified unknown	714	0	26.2	1	Could Not Be Accurately Determined
73	PA2127	NP_250817	A0A2V3G0E4	N/A	Q9I1Y8	Q9I1Y8_PSEAE	N/A	N/A	hypothetical protein PA2127 [Pseudomonas aeruginosa PAO1]	408	Transcriptional regulators	1227	cgrA	47.6	3	0.08
74	PA2150	NP_250840	A0A7L9EN95	N/A	Q9I1W5	KU_PSEAE	K10979	N/A	non-homologous end joining protein Ku [Pseudomonas aeruginosa PAO1]	293	Hypothetical unclassified unknown	882	0	32.8	1	Could Not Be Accurately Determined
75	PA2205	NP_250895	A0A8F9NVU3	N/A	Q9I1R2	Q9I1R2_PSEAE	N/A	N/A	hypothetical protein PA2205 [Pseudomonas aeruginosa PAO1]	158	Hypothetical unclassified unknown	477	0	17	1	0.08
76	PA2210	NP_250900	A0A8G3W9N4	N/A	Q9I1Q7	Q9I1Q7_PSEAE	K08194	N/A	major facilitator superfamily transporter [Pseudomonas aeruginosa PAO1]	441	Membrane proteins,Transport of small molecules	1326	0	46	1	0.02
77	PA2252	NP_250942	A0A0A8RN43	N/A	Q9I1L7	Q9I1L7_PSEAE	K03310	N/A	AGCS sodium/alanine/glycine symporter [Pseudomonas aeruginosa PAO1]	481	Transport of small molecules	1446	0	51.5	9	0.33
78	PA2260	NP_250950	A0A8G2R4A9	N/A	Q9I1L3	Q9I1L3_PSEAE	N/A	N/A	hypothetical protein PA2260 [Pseudomonas aeruginosa PAO1]	260	Carbon compound catabolism	783	0	29	1	Could Not Be Accurately Determined
79	PA2264	NP_250954	A0A5F1BFS4	N/A	Q9I1K9	Q9I1K9_PSEAE	K06152	Pentose phosphate pathway;Metabolic pathways;Microbial metabolism in diverse environments	hypothetical protein PA2264 [Pseudomonas aeruginosa PAO1]	238	Hypothetical unclassified unknown	717	0	26.4	4	0.34
80	PA2278	NP_250968	A0A8I1D4M6	N/A	Q9I1J6	Q9I1J6_PSEAE	K03893	N/A	arsenite-antimonite efflux pump ArsB [Pseudomonas aeruginosa PAO1]	427	Membrane proteins,Transport of small molecules	1284	arsB	45.1	1	0.04
81	PA2283	NP_250973	A0A3M5DQY8	N/A	Q9I1J2	Q9I1J2_PSEAE	N/A	N/A	hypothetical protein PA2283 [Pseudomonas aeruginosa PAO1]	485	Hypothetical unclassified unknown	1458	0	54.1	1	0.01
82	PA2291	NP_250981	A0A8G4YEV4	N/A	Q9I1I4	Q9I1I4_PSEAE	K07267	N/A	glucose-sensitive porin [Pseudomonas aeruginosa PAO1]	452	Transport of small molecules	1359	0	50.5	6	0.21
83	PA2343	NP_251033	A0A8G5FVT6	N/A	Q9I1D5	Q9I1D5_PSEAE	K00854	Pentose and glucuronate interconversions;Metabolic pathways	xylulose kinase [Pseudomonas aeruginosa PAO1]	502	Carbon compound catabolism	1509	mtlY	53	1	Could Not Be Accurately Determined
84	PA2352	NP_251042	A0A8A9A8I3	N/A	Q9I1C6	Q9I1C6_PSEAE	K01126	Glycerophospholipid metabolism	glycerophosphoryl diester phosphodiesterase [Pseudomonas aeruginosa PAO1]	375	Putative enzymes	1128	0	41.1	1	0.03
85	PA2360	NP_251050	A0A8G3CRJ2	N/A	Q9I1B9	Q9I1B9_PSEAE	K11902	N/A	hypothetical protein PA2360 [Pseudomonas aeruginosa PAO1]	366	Hypothetical unclassified unknown	1101	hsiA3	40.8	1	0.05
86	PA2388	NP_251078	A0A0H2ZA66	N/A	Q9I192	Q9I192_PSEAE	K07165	Two-component system	protein FpvR [Pseudomonas aeruginosa PAO1]	331	Membrane proteins,Transcriptional regulators,Transport of small molecules	996	fpvR	37	2	0.09
87	PA2427	NP_251117	A0A241XIW8	N/A	Q9I155	Q9I155_PSEAE	N/A	N/A	hypothetical protein PA2427 [Pseudomonas aeruginosa PAO1]	155	Hypothetical unclassified unknown	468	0	17.5	1	Could Not Be Accurately Determined
88	PA2457	NP_251147	A0A8F9V4B3	N/A	Q9I125	Q9I125_PSEAE	N/A	N/A	hypothetical protein PA2457 [Pseudomonas aeruginosa PAO1]	326	Hypothetical unclassified unknown	981	0	36.1	1	0.03
89	PA2471	NP_251161	A0A8G3Y8Z8	N/A	Q9I111	Q9I111_PSEAE	K16165	Tyrosine metabolism;Metabolic pathways;Microbial metabolism in diverse environments	hypothetical protein PA2471 [Pseudomonas aeruginosa PAO1]	232	Hypothetical unclassified unknown	699	0	25.6	1	0.06
90	PA2525	NP_251215	A0A8B4ZCW1	N/A	Q9I0V8	Q9I0V8_PSEAE	N/A	N/A	hypothetical protein PA2525 [Pseudomonas aeruginosa PAO1]	498	Antibiotic resistance and susceptibility,Membrane proteins,Transport of small molecules	1497	opmB	53.9	7	0.23
91	PA2528	NP_251218	A0A8G3DCG2	N/A	Q9I0V5	Q9I0V5_PSEAE	K07799	Two-component system	resistance-nodulation-cell division (RND) efflux membrane fusion protein [Pseudomonas aeruginosa PAO1]	426	Antibiotic resistance and susceptibility,Transport of small molecules	1281	muxA	45.3	7	0.24
92	PA2584	NP_251274	A0A071L4D2	N/A	Q9I0Q2	Q9I0Q2_PSEAE	K00995	Glycerophospholipid metabolism;Metabolic pathways	CDP-diacylglycerol--glycerol-3-phosphate 3-phosphatidyltransferase [Pseudomonas aeruginosa PAO1]	186	Fatty acid and phospholipid metabolism,Glycerolipid metabolism	561	pgsA	20.5	3	0.15
93	PA2645	NP_251335	A0A069QAA9	7.1.1.-	Q9I0J3	NUOJ_PSEAE	K00339	Oxidative phosphorylation;Metabolic pathways	NADH-quinone oxidoreductase subunit J [Pseudomonas aeruginosa PAO1]	166	Energy metabolism,Oxidative phosphorylation	501	nuoJ	17.6	1	0.09
94	PA2648	NP_251338	A0A5E5RA99	N/A	Q9I0J0	NUOM_PSEAE	K00342	Oxidative phosphorylation;Metabolic pathways	NADH-quinone oxidoreductase subunit M [Pseudomonas aeruginosa PAO1]	509	Energy metabolism,Oxidative phosphorylation	1530	nuoM	55.7	4	0.13
95	PA2662	NP_251352	A0A0A8RTJ8	N/A	Q9I0H6	Q9I0H6_PSEAE	K07234	N/A	hypothetical protein PA2662 [Pseudomonas aeruginosa PAO1]	397	Membrane proteins	1194	0	43.2	2	0.04
96	PA2664	NP_251354	A0A0A8RPQ4	N/A	Q9I0H4	HMP_PSEAE	K05916	N/A	flavohemoprotein [Pseudomonas aeruginosa PAO1]	393	Energy metabolism	1182	fhp	43.7	2	0.1
97	PA2692	NP_251382	A0A8I1D2K0	N/A	Q9I0F0	Q9I0F0_PSEAE	N/A	N/A	transcriptional regulator [Pseudomonas aeruginosa PAO1]	174	Transcriptional regulators	525	0	19.1	1	Could Not Be Accurately Determined
98	PA2755	NP_251445	A0A0A8RDW3	N/A	Q9I088	ECOT_PSEAE	K08276	N/A	ecotin [Pseudomonas aeruginosa PAO1]	156	Translation post translation modification degradation	471	eco	17.2	1	0.06
99	PA2761	NP_251451	A0A8G3IWC4	N/A	Q9I082	Q9I082_PSEAE	N/A	N/A	hypothetical protein PA2761 [Pseudomonas aeruginosa PAO1]	138	Membrane proteins	417	0	15.5	1	0.09
100	PA2766	NP_251456	A0A8F9NXI2	N/A	Q9I077	Q9I077_PSEAE	K16137	N/A	transcriptional regulator [Pseudomonas aeruginosa PAO1]	193	Transcriptional regulators	582	0	20.8	1	0.05
101	PA2774	NP_251464	A0A072ZTP1	N/A	Q9I069	Q9I069_PSEAE	N/A	N/A	hypothetical protein PA2774 [Pseudomonas aeruginosa PAO1]	195	Membrane proteins,Secreted factors (toxins, enzymes, alginate)	588	tse4	19.2	2	0.2
102	PA2805	NP_251495	A0A071KU07	N/A	Q9I038	Q9I038_PSEAE	N/A	N/A	hypothetical protein PA2805 [Pseudomonas aeruginosa PAO1]	87	Hypothetical unclassified unknown	264	0	9.7	5	0.78
103	PA2834	NP_251524	A0A2R3J2I5	N/A	Q9I009	Q9I009_PSEAE	N/A	N/A	transcriptional regulator [Pseudomonas aeruginosa PAO1]	319	Transcriptional regulators	960	0	36.1	1	0.04
104	PA2980	NP_251670	A0A8G2YVP9	N/A	Q9HZM4	Y2980_PSEAE	K09791	N/A	hypothetical protein PA2980 [Pseudomonas aeruginosa PAO1]	61	Hypothetical unclassified unknown	186	0	6.7	3	0.62
105	PA2982	NP_251672	A0A7M3B5J2	N/A	Q9HZM2	Q9HZM2_PSEAE	K03559	N/A	hypothetical protein PA2982 [Pseudomonas aeruginosa PAO1]	146	Hypothetical unclassified unknown	441	0	15.7	2	0.19
106	PA2996	NP_251686	A0A8G6I3U7	N/A	Q9HZK9	NQRD_PSEAE	K00349	N/A	Na(+)-translocating NADH-quinone reductase subunit D [Pseudomonas aeruginosa PAO1]	224	Energy metabolism	675	nqrD	24.3	2	0.07
107	PA3000	NP_251690	A0A077JYF5	N/A	Q9HZK5	Q9HZK5_PSEAE	K11734	N/A	aromatic amino acid transporter AroP [Pseudomonas aeruginosa PAO1]	469	Transport of small molecules	1410	aroP1	51	1	0.03
108	PA3006	NP_251696	A0A071LFB2	N/A	Q9HZJ9	Q9HZJ9_PSEAE	N/A	N/A	transcriptional regulator PsrA [Pseudomonas aeruginosa PAO1]	233	Transcriptional regulators	702	psrA	25.8	1	0.05
109	PA3067	NP_251757	A0A367MG29	N/A	Q9HZE1	Q9HZE1_PSEAE	N/A	N/A	transcriptional regulator [Pseudomonas aeruginosa PAO1]	147	Transcriptional regulators	444	0	16.4	1	0.1
110	PA3069	NP_251759	A0A367MC79	N/A	Q9HZD9	Q9HZD9_PSEAE	N/A	N/A	hypothetical protein PA3069 [Pseudomonas aeruginosa PAO1]	256	Hypothetical unclassified unknown	618	0	23.2	1	0.08
111	PA3072	NP_251762	A0A5F1BQN4	N/A	Q9HZD6	Q9HZD6_PSEAE	N/A	N/A	hypothetical protein PA3072 [Pseudomonas aeruginosa PAO1]	164	Hypothetical unclassified unknown	495	0	18.1	1	0.05
112	PA3078	NP_251768	A0A8G4LKC7	N/A	Q9HZD0	Q9HZD0_PSEAE	N/A	N/A	two-component sensor [Pseudomonas aeruginosa PAO1]	431	Two component regulatory systems,Two-component System	1296	cprS	48.4	2	0.06
113	PA3082	NP_251772	A0A2R3IPI2	N/A	Q9HZC6	Q9HZC6_PSEAE	N/A	N/A	glycine betaine transmethylase [Pseudomonas aeruginosa PAO1]	654	Amino acid biosynthesis and metabolism,Choline, betaine and methionine metabolism	1965	gbt	71.4	4	0.09
114	PA3097	NP_251787	A0A3S0LC37	N/A	Q00518	GSPK_PSEAE	K02460	Biofilm formation - Vibrio cholerae	type II secretion system protein K [Pseudomonas aeruginosa PAO1]	333	Protein secretion export apparatus	1002	xcpX	37	1	Could Not Be Accurately Determined
115	PA3103	NP_251793	A0A8G3PDK8	N/A	Q00512	GSPE_PSEAE	K02454	Biofilm formation - Vibrio cholerae	type II secretion system protein E [Pseudomonas aeruginosa PAO1]	502	Protein secretion export apparatus	1509	xcpR	55.5	2	0.05
116	PA3151	NP_251841	A0A2X1YNY6	4.3.2.10	P72139	HIS62_PSEAE	K02500	Histidine metabolism;Metabolic pathways;Biosynthesis of secondary metabolites;Biosynthesis of amino acids	imidazole glycerol phosphate synthase subunit HisF [Pseudomonas aeruginosa PAO1]	251	Amino acid biosynthesis and metabolism,Histidine metabolism	756	hisF2	27.4	1	0.04
117	PA3152	NP_251842	A0A2V3FYK8	4.3.2.10	P72138	HIS52_PSEAE	K02501	Histidine metabolism;Metabolic pathways;Biosynthesis of secondary metabolites;Biosynthesis of amino acids	imidazole glycerol phosphate synthase subunit HisH [Pseudomonas aeruginosa PAO1]	202	Amino acid biosynthesis and metabolism,Histidine metabolism	609	hisH2	22.7	1	0.09
118	PA3154	NP_251844	A0A1S6JV67	N/A	G3XCW3	G3XCW3_PSEAE	N/A	N/A	B-band O-antigen polymerase [Pseudomonas aeruginosa PAO1]	438	Cell wall LPS capsule,Lipopolysaccharide biosynthesis,Membrane proteins	1317	wzy	48.9	1	0.03
119	PA3161	NP_251851	A0A1C7BUD9	N/A	Q51473	IHFB_PSEAE	K05788	N/A	integration host factor subunit beta [Pseudomonas aeruginosa PAO1]	94	DNA replication recombination modification and repair,Transcription RNA processing and degradation,Translation post translation modification degradation	285	himD	10.6	1	0.16
120	PA3194	NP_251884	A0A8G7BXJ6	N/A	P31961	EDD_PSEAE	K01690	Pentose phosphate pathway;Metabolic pathways;Microbial metabolism in diverse environments;Carbon metabolism	phosphogluconate dehydratase [Pseudomonas aeruginosa PAO1]	608	Carbon compound catabolism,Energy metabolism,Pentose phosphate cycle	1827	edd	65.2	1	Could Not Be Accurately Determined
121	PA3196	NP_251886	A0A7M2ZPV0	N/A	Q9HZ44	Q9HZ44_PSEAE	N/A	N/A	hypothetical protein PA3196 [Pseudomonas aeruginosa PAO1]	176	Hypothetical unclassified unknown	531	0	19.3	1	0.07
122	PA3239	NP_251929	A0A8G4J6T3	N/A	Q9HZ01	Q9HZ01_PSEAE	K04754	N/A	hypothetical protein PA3239 [Pseudomonas aeruginosa PAO1]	267	Hypothetical unclassified unknown	804	0	30.4	1	0.04
123	PA3286	NP_251976	A0A8G3BRW5	N/A	Q9HYV7	BEKAS_PSEAE	K16872	N/A	3-oxoacyl-ACP synthase [Pseudomonas aeruginosa PAO1]	350	Hypothetical unclassified unknown	1053	0	38.1	2	0.1
124	PA3294	NP_251984	A0A6A9JR65	N/A	Q9HYU9	Q9HYU9_PSEAE	K11904	N/A	hypothetical protein PA3294 [Pseudomonas aeruginosa PAO1]	688	Hypothetical unclassified unknown	2067	vgrG4a	77	1	0.03
125	PA3302	NP_251992	A0A8G3E4P9	N/A	G3XD52	G3XD52_PSEAE	K17865	Glyoxylate and dicarboxylate metabolism;Butanoate metabolism;Metabolic pathways;Microbial metabolism in diverse environments;Carbon metabolism	hypothetical protein PA3302 [Pseudomonas aeruginosa PAO1]	156	Putative enzymes	471	phaJ1	16.9	1	0.05
126	PA3350	NP_252040	A0A0A8RFU3	N/A	Q9HYP6	Q9HYP6_PSEAE	K02386	N/A	flagellar basal body P-ring biosynthesis protein FlgA [Pseudomonas aeruginosa PAO1]	232	Hypothetical unclassified unknown	699	0	25.5	1	0.07
127	PA3381	NP_252071	A0A2R3IUJ5	N/A	Q9HYM0	Q9HYM0_PSEAE	K02043	N/A	transcriptional regulator [Pseudomonas aeruginosa PAO1]	240	Phosphonate utilization,Transcriptional regulators	723	0	27	1	Could Not Be Accurately Determined
128	PA3391	NP_252081	A0A0A8RBQ8	N/A	Q9HYL3	NOSR_PSEAE	K19339	N/A	regulatory protein NosR [Pseudomonas aeruginosa PAO1]	715	Energy metabolism,Membrane proteins	2148	nosR	80.2	5	0.09
129	PA3396	NP_252086	A0A8G2RN26;A0A8G6SD15	N/A	Q9HYK8	Q9HYK8_PSEAE	K19342	N/A	acessory protein NosL [Pseudomonas aeruginosa PAO1]	178	Energy metabolism	537	nosL	19.3	2	0.16
130	PA3418	NP_252108	A0A8B5AVW4	N/A	Q9HYI7	Q9HYI7_PSEAE	K00263	Valine, leucine and isoleucine degradation;Valine, leucine and isoleucine biosynthesis;Metabolic pathways;Biosynthesis of secondary metabolites	leucine dehydrogenase [Pseudomonas aeruginosa PAO1]	341	Amino acid biosynthesis and metabolism	1026	ldh	35.6	1	Could Not Be Accurately Determined
131	PA3484	NP_252174	A0A8G3DMU9	N/A	Q9HYC5	Q9HYC5_PSEAE	N/A	N/A	hypothetical protein PA3484 [Pseudomonas aeruginosa PAO1]	408	Hcp secretion island I (HSI-I) type VI secretion system,Secreted factors (toxins, enzymes, alginate)	1227	tse3	44.4	1	0.04
132	PA3485	NP_252175	A0A0D6GN07	N/A	Q9HYC4	Q9HYC4_PSEAE	N/A	N/A	hypothetical protein PA3485 [Pseudomonas aeruginosa PAO1]	145	Adaptation protection	438	tsi3	15.8	1	0.08
133	PA3551	NP_252241	A0A3M5EAD7	2.7.7.13	P07874	ALGA_PSEAE	K16011	Fructose and mannose metabolism;Amino sugar and nucleotide sugar metabolism;O-Antigen nucleotide sugar biosynthesis;Metabolic pathways;Biosynthesis of secondary metabolites;Biosynthesis of nucleotide sugars	bifunctional mannose-1-phosphate guanylyltransferase/mannose-6-phosphate isomerase [Pseudomonas aeruginosa PAO1]	481	Adaptation protection,Alginate biosynthesis,Cell wall LPS capsule,Fructose and mannose metabolism,Secreted factors (toxins, enzymes, alginate)	1446	algA	53.1	1	Could Not Be Accurately Determined
134	PA3588	NP_252278	A0A2R3IMU2	N/A	Q9HY38	Q9HY38_PSEAE	N/A	N/A	porin [Pseudomonas aeruginosa PAO1]	416	Carbon compound catabolism,Membrane proteins,Transport of small molecules	1251	0	45.7	1	0.03
135	PA3620	NP_252310	A0A0A8RB97	N/A	Q9HY08	MUTS_PSEAE	K03555	N/A	DNA mismatch repair protein MutS [Pseudomonas aeruginosa PAO1]	855	DNA replication recombination modification and repair	2568	mutS	95	3	0.06
136	PA3626	NP_252316	A0A8G7ME50	N/A	Q9HY04	TRUD_PSEAE	K06176	N/A	tRNA pseudouridine synthase D [Pseudomonas aeruginosa PAO1]	355	Hypothetical unclassified unknown	1068	0	38.8	1	0.03
137	PA3651	NP_252341	A0A069Q7C6	2.7.7.41	Q59640	CDSA_PSEAE	K00981	Glycerophospholipid metabolism;Metabolic pathways;Biosynthesis of secondary metabolites	phosphatidate cytidylyltransferase [Pseudomonas aeruginosa PAO1]	271	Fatty acid and phospholipid metabolism,Glycerolipid metabolism	816	cdsA	28.9	1	0.06
138	PA3658	NP_252348	A0A2C9WXN1	N/A	Q9Z9H0	GLND_PSEAE	K00990	Two-component system	bifunctional uridylyltransferase/uridylyl-removing protein [Pseudomonas aeruginosa PAO1]	900	Amino acid biosynthesis and metabolism	2703	glnD	103.4	1	0.06
139	PA3676	NP_252366	A0A2R3ILR7;A0A8G7JTE2	N/A	Q9HXW4	Q9HXW4_PSEAE	K18303	N/A	resistance-nodulation-cell division (RND) efflux transporter [Pseudomonas aeruginosa PAO1]	1025	Antibiotic resistance and susceptibility,Membrane proteins,Transport of small molecules	3078	mexK	113.3	2	0.01
140	PA3688	NP_252378	A0A8G3WIW7	N/A	Q9HXV2	Q9HXV2_PSEAE	N/A	N/A	hypothetical protein PA3688 [Pseudomonas aeruginosa PAO1]	114	Hypothetical unclassified unknown	345	0	12.9	1	0.17
141	PA3695	NP_252385	A0A073A2P6	N/A	Q9HXU5	Q9HXU5_PSEAE	K06889	N/A	hypothetical protein PA3695 [Pseudomonas aeruginosa PAO1]	301	Hypothetical unclassified unknown	906	0	33.3	1	0.04
142	PA3705	NP_252394	A0A8G4T9V8	N/A	Q9HXT6	Q9HXT6_PSEAE	K13489	Two-component system	hypothetical protein PA3705 [Pseudomonas aeruginosa PAO1]	229	Chemosensory,Chemotaxis,Chemotaxis,Motility	690	wspD	24.9	1	0.12
143	PA3725	NP_252414	A0A8G7Q421	N/A	Q9HXR7	Q9HXR7_PSEAE	K07462	N/A	single-stranded-DNA-specific exonuclease RecJ [Pseudomonas aeruginosa PAO1]	571	DNA replication recombination modification and repair	1716	recJ	62.3	1	0.03
144	PA3744	NP_252433	A0A0C7D1W2	N/A	Q9HXQ0	RIMM_PSEAE	K02860	N/A	ribosome maturation factor RimM [Pseudomonas aeruginosa PAO1]	175	Transcription RNA processing and degradation	528	rimM	19.8	4	0.34
145	PA3761	NP_252450	A0A8G7FIA0	N/A	Q9HXN4	Q9HXN4_PSEAE	K02804	Amino sugar and nucleotide sugar metabolism	N-acetyl-D-glucosamine phosphotransferase system transporter [Pseudomonas aeruginosa PAO1]	570	Transport of small molecules	1713	nagE	60.6	1	0.02
146	PA3766	NP_252455	A0A8G6VA59	N/A	Q9HXM9	Q9HXM9_PSEAE	N/A	N/A	aromatic amino acid transporter [Pseudomonas aeruginosa PAO1]	418	Transport of small molecules	1257	0	44.8	1	0.05
147	PA3774	NP_252463	A0A7M2ZTU0	N/A	Q9HXM1	Q9HXM1_PSEAE	N/A	N/A	acetylpolyamine aminohydrolase [Pseudomonas aeruginosa PAO1]	380	Putative enzymes	1143	0	41	1	Could Not Be Accurately Determined
148	PA3794	NP_252483	A0A8G3TKB9	N/A	Q9HXK3	Q9HXK3_PSEAE	N/A	N/A	hypothetical protein PA3794 [Pseudomonas aeruginosa PAO1]	151	Membrane proteins	456	0	16	1	0.07
149	PA3796	NP_252485	A0A069QEK1	N/A	Q9HXK1	Q9HXK1_PSEAE	N/A	N/A	hypothetical protein PA3796 [Pseudomonas aeruginosa PAO1]	195	Hypothetical unclassified unknown	588	0	18.3	1	0.11
150	PA3813	NP_252502	A0A0H2ZEZ6	N/A	Q9HXI9	Q9HXI9_PSEAE	K04488	N/A	scaffold protein [Pseudomonas aeruginosa PAO1]	128	Biosynthesis of cofactors, prosthetic groups and carriers,Sulfur metabolism	387	iscU	13.8	1	0.18
151	PA3818	NP_252507	A0A8F9K1J8	N/A	Q9HXI4	SUHB_PSEAE	K01092	Streptomycin biosynthesis;Inositol phosphate metabolism;Metabolic pathways;Biosynthesis of secondary metabolites	type III secretion system regulator SuhB [Pseudomonas aeruginosa PAO1]	271	Adaptation protection,Translation post translation modification degradation	816	0	29.5	1	0.06
152	PA3839	NP_252528	A0A069Q3M6	N/A	Q9HXG5	Q9HXG5_PSEAE	N/A	N/A	sodium:sulfate symporter [Pseudomonas aeruginosa PAO1]	610	Membrane proteins,Transport of small molecules	1833	0	65.2	1	0.01
153	PA3872	NP_252561	A0A071KYT7	N/A	G3XD18	G3XD18_PSEAE	K00374	Nitrogen metabolism;Metabolic pathways;Microbial metabolism in diverse environments;Two-component system	respiratory nitrate reductase subunit gamma [Pseudomonas aeruginosa PAO1]	227	Energy metabolism,Nitrogen metabolism	684	narI	25	1	0.04
154	PA3873	NP_252562	A0A8F9JY91	N/A	G3XCY9	G3XCY9_PSEAE	K00373	Two-component system	respiratory nitrate reductase subunit delta [Pseudomonas aeruginosa PAO1]	246	Energy metabolism	741	narJ	27.3	1	0.04
155	PA3876	NP_252565	O54042	N/A	Q9HXD4	Q9HXD4_PSEAE	K02575	Nitrogen metabolism	nitrite extrusion protein 2 [Pseudomonas aeruginosa PAO1]	468	Membrane proteins,Nitrogen metabolism,Transport of small molecules	1407	narK2	50.6	1	0.04
156	PA3877	NP_252566	A0A069Q5D4	N/A	G3XD60	G3XD60_PSEAE	K02575	Nitrogen metabolism	nitrite extrusion protein 1 [Pseudomonas aeruginosa PAO1]	431	Membrane proteins,Nitrogen metabolism,Transport of small molecules	1296	narK1	47.3	5	0.14
157	PA3892	NP_252581	A0A2R3IVQ7	N/A	Q9HXC1	Q9HXC1_PSEAE	N/A	N/A	hypothetical protein PA3892 [Pseudomonas aeruginosa PAO1]	302	Hypothetical unclassified unknown	909	0	33.7	1	0.07
158	PA3893	NP_252582	A0A8G3XVT5	N/A	Q9HXC0	Q9HXC0_PSEAE	N/A	N/A	hypothetical protein PA3893 [Pseudomonas aeruginosa PAO1]	731	Membrane proteins	2196	0	80.5	1	0.02
159	PA3924	NP_252613	V5LUK6	N/A	Q9HX89	Q9HX89_PSEAE	N/A	N/A	long-chain-fatty-acid--CoA ligase [Pseudomonas aeruginosa PAO1]	560	Fatty acid and phospholipid metabolism	1683	0	62.3	1	0.01
160	PA3983	NP_252672	A0A8G4ANS6	N/A	Q9HX36	Q9HX36_PSEAE	K06189	N/A	hypothetical protein PA3983 [Pseudomonas aeruginosa PAO1]	279	Hypothetical unclassified unknown	840	0	31.5	1	0.05
161	PA4031	NP_252720	A0A069QC72	3.6.1.1	Q9HWZ6	IPYR_PSEAE	K01507	Oxidative phosphorylation	inorganic pyrophosphatase [Pseudomonas aeruginosa PAO1]	175	Central intermediary metabolism	528	ppa	19.4	1	0.06
162	PA4110	NP_252799	A0A2I8ANN3	3.5.2.6	P24735	Q541D8_PSEAI	K20320	beta-Lactam resistance	beta-lactamase [Pseudomonas aeruginosa PAO1]	397	Adaptation protection,Adaptation protection,Adaptation protection,Adaptation protection	1194	ampC	43.4	1	0.05
163	PA4117	NP_252806	A0A0H2ZDJ5	N/A	Q9HWR3	BPHY_PSEAE	N/A	N/A	phytochrome BphP [Pseudomonas aeruginosa PAO1]	728	Two component regulatory systems,Two-component System	2187	bphP	80.9	1	Could Not Be Accurately Determined
164	PA4154	NP_252843	A0A8F9V7S7	N/A	Q9HWM7	Q9HWM7_PSEAE	K07184	N/A	hypothetical protein PA4154 [Pseudomonas aeruginosa PAO1]	222	Hypothetical unclassified unknown	669	0	24.1	6	0.32
165	PA4184	NP_252873	A0A8G2K7I5	N/A	Q9HWJ7	Q9HWJ7_PSEAE	K21826	N/A	transcriptional regulator [Pseudomonas aeruginosa PAO1]	340	Transcriptional regulators	1023	souR	37.7	1	Could Not Be Accurately Determined
166	PA1905	NP_252905	A0A8G2RHT0	N/A	Q820A5	Q820A5_PSEAE	K20262	Phenazine biosynthesis;Metabolic pathways;Biosynthesis of secondary metabolites	pyridoxamine 5'-phosphate oxidase [Pseudomonas aeruginosa PAO1]	215	Phenazine biosynthesis,Secreted factors (toxins, enzymes, alginate)	648	phzG2	24.4	1	0.03
167	PA4311	NP_253001	A0A8G4B250	N/A	Q9HW90	Q9HW90_PSEAE	K14335	Metabolic pathways	hypothetical protein PA4311 [Pseudomonas aeruginosa PAO1]	371	Hypothetical unclassified unknown	1116	0	41.1	1	Could Not Be Accurately Determined
168	PA4318	NP_253008	A0A8G4MLD5	N/A	Q9HW83	Q9HW83_PSEAE	N/A	N/A	hypothetical protein PA4318 [Pseudomonas aeruginosa PAO1]	265	Membrane proteins	798	0	28.8	2	0.1
169	PA4319	NP_253009	A0A8G2VTG4	N/A	Q9HW82	Q9HW82_PSEAE	N/A	N/A	hypothetical protein PA4319 [Pseudomonas aeruginosa PAO1]	326	Membrane proteins	981	0	36.4	1	0.03
170	PA4326	NP_253016	A0A8A4EXA2	N/A	Q9HW75	Q9HW75_PSEAE	N/A	N/A	hypothetical protein PA4326 [Pseudomonas aeruginosa PAO1]	127	Hypothetical unclassified unknown	384	0	14.3	1	0.1
171	PA4339	NP_253029	A0A3S0L322	N/A	Q9HW62	Q9HW62_PSEAE	K06131	Glycerophospholipid metabolism;Metabolic pathways	phospholipase [Pseudomonas aeruginosa PAO1]	359	Fatty acid and phospholipid metabolism	1080	0	41.4	2	0.05
172	PA4386	NP_253076	A0A8G6EYG2	N/A	P30720	CH10_PSEAE	K04078	N/A	co-chaperonin GroES [Pseudomonas aeruginosa PAO1]	97	Chaperones heatshock protein	294	groES	10.3	3	0.41
173	PA4405	NP_253095	A0A8G3IRW1	N/A	Q9HW03	Q9HW03_PSEAE	N/A	N/A	hypothetical protein PA4405 [Pseudomonas aeruginosa PAO1]	131	Hypothetical unclassified unknown	396	0	15.1	1	0.1
174	PA4409	NP_253099	A0A0H2ZGP2	N/A	Q9LCT5	Q9LCT5_PSEAI	K03589	N/A	cell division protein FtsQ [Pseudomonas aeruginosa PAO1]	287	Cell division	864	ftsQ	32.2	2	0.11
175	PA4427	NP_253117	A0A072ZPI1	N/A	Q9HVY8	Q9HVY8_PSEAE	K03600	N/A	ClpXP protease specificity-enhancing factor [Pseudomonas aeruginosa PAO1]	135	Adaptation protection	408	sspB	14.5	2	0.26
176	PA4465	NP_253155	A0A8G3HJY7	N/A	Q9HVV3	Y4465_PSEAE	K06958	N/A	hypothetical protein PA4465 [Pseudomonas aeruginosa PAO1]	286	Hypothetical unclassified unknown	861	0	32.2	1	0.07
177	PA4492	NP_253182	A0A8G5ZK69	N/A	Q9HVS9	Q9HVS9_PSEAE	N/A	N/A	hypothetical protein PA4492 [Pseudomonas aeruginosa PAO1]	269	Hypothetical unclassified unknown	810	magA	29.3	1	0.04
178	PA4551	NP_253241	A0A8G2QW55	N/A	G3XD84	G3XD84_PSEAE	K02671	N/A	type 4 fimbrial biogenesis protein PilV [Pseudomonas aeruginosa PAO1]	185	Motility,Pilin biosynthesis	558	pilV	20.1	2	0.18
179	PA4566	NP_253256	A0A8G7TMK5	N/A	Q9HVL8	OBG_PSEAE	K03979	N/A	GTPase ObgE [Pseudomonas aeruginosa PAO1]	406	Adaptation protection	1221	obg	44.3	1	0.05
180	PA4571	NP_253261	A0A080VJG4	N/A	Q9HVL3	Q9HVL3_PSEAE	K19713	N/A	cytochrome C [Pseudomonas aeruginosa PAO1]	675	Energy metabolism	2028	0	73.4	7	0.18
181	PA4572	NP_253262	A0A8G7AS25	N/A	Q9HVL2	Q9HVL2_PSEAE	K03773	N/A	peptidyl-prolyl cis-trans isomerase FklB [Pseudomonas aeruginosa PAO1]	205	Chaperones heatshock protein,Translation post translation modification degradation	618	fklB	21.8	4	0.35
182	PA4578	NP_253268	A0A0A8RGS9	N/A	Q9HVK6	Q9HVK6_PSEAE	N/A	N/A	hypothetical protein PA4578 [Pseudomonas aeruginosa PAO1]	162	Hypothetical unclassified unknown	489	0	16.9	1	0.1
183	PA4591	NP_253281	A0A8I1D5Y8	N/A	Q9HVJ5	Q9HVJ5_PSEAE	K02005	N/A	hypothetical protein PA4591 [Pseudomonas aeruginosa PAO1]	425	Hypothetical unclassified unknown	1278	0	46	1	0.02
184	PA4607	NP_253297	A0A072ZDV5	N/A	Q9HVI2	Q9HVI2_PSEAE	N/A	N/A	hypothetical protein PA4607 [Pseudomonas aeruginosa PAO1]	168	Hypothetical unclassified unknown	507	0	17.5	1	0.1
185	PA4610	NP_253300	A0A140SGC5	N/A	Q9HVI0	Q9HVI0_PSEAE	N/A	N/A	hypothetical protein PA4610 [Pseudomonas aeruginosa PAO1]	144	Hypothetical unclassified unknown	435	0	15.6	2	0.14
186	PA4684	NP_253373	A0A069PXY3	N/A	Q9HVB1	Q9HVB1_PSEAE	N/A	N/A	hypothetical protein PA4684 [Pseudomonas aeruginosa PAO1]	432	Hypothetical unclassified unknown	1299	0	49.2	3	0.08
187	PA4718	NP_253406	A0A072ZX55	N/A	Q9HV80	Q9HV80_PSEAE	N/A	N/A	hypothetical protein PA4718 [Pseudomonas aeruginosa PAO1]	158	Hypothetical unclassified unknown	477	0	16.8	1	0.09
188	PA4719	NP_253407	A0A072ZJZ8	N/A	Q9HV79	Q9HV79_PSEAE	K06901	N/A	transporter [Pseudomonas aeruginosa PAO1]	431	Membrane proteins,Transport of small molecules	1296	0	44.8	1	0.03
189	PA4721	NP_253409	A0A8I0ZLX4	N/A	Q9HV77	SFSA_PSEAE	K06206	N/A	sugar fermentation stimulation protein A [Pseudomonas aeruginosa PAO1]	235	Hypothetical unclassified unknown	708	0	25.8	1	Could Not Be Accurately Determined
190	PA4742	NP_253430	A0A0A8RHH2	5.4.99.25	P72154	TRUB_PSEAE	K03177	N/A	tRNA pseudouridine synthase B [Pseudomonas aeruginosa PAO1]	304	Transcription RNA processing and degradation,Translation post translation modification degradation	915	truB	33.4	4	0.2
191	PA4749	NP_253437	A0A081HSE1	5.4.2.10	Q9HV50	GLMM_PSEAE	K03431	Amino sugar and nucleotide sugar metabolism;Metabolic pathways;Biosynthesis of nucleotide sugars	phosphoglucosamine mutase [Pseudomonas aeruginosa PAO1]	445	Cell wall LPS capsule	1338	glmM	47.8	5	0.16
192	PA4763	NP_253451	A0A8A9AVM7	N/A	Q9HV41	Q9HV41_PSEAE	K03631	N/A	DNA repair protein RecN [Pseudomonas aeruginosa PAO1]	558	DNA replication recombination modification and repair	1677	recN	60.7	1	Could Not Be Accurately Determined
193	PA4768	NP_253456	A0A8G6RAX4	N/A	Q9HV40	SSRP_PSEAE	K03664	N/A	SsrA-binding protein [Pseudomonas aeruginosa PAO1]	159	Translation post translation modification degradation	480	smpB	18	1	0.07
194	PA4775	NP_253463	A0A485G3A9	N/A	Q9HV33	Q9HV33_PSEAE	N/A	N/A	hypothetical protein PA4775 [Pseudomonas aeruginosa PAO1]	286	Hypothetical unclassified unknown	861	0	32.4	2	0.14
195	PA4807	NP_253495	A0A8G6ZR68	N/A	Q9HV02	Q9HV02_PSEAE	K03833	N/A	selenocysteine-specific elongation factor [Pseudomonas aeruginosa PAO1]	641	Translation post translation modification degradation	1926	selB	71	1	0.03
196	PA4815	NP_253502	A0A069Q1K5	N/A	Q9HUZ5	Q9HUZ5_PSEAE	K09936	N/A	hypothetical protein PA4815 [Pseudomonas aeruginosa PAO1]	149	Membrane proteins	450	0	15.8	1	0.06
197	PA4847	NP_253534	A0A0H2ZIA1	N/A	P37799	BCCP_PSEAE	K02160	Fatty acid biosynthesis;Pyruvate metabolism;Propanoate metabolism;Carbon fixation pathways in prokaryotes;Metabolic pathways;Biosynthesis of secondary metabolites;Microbial metabolism in diverse environments;Carbon metabolism;Fatty acid metabolism	acetyl-CoA carboxylase biotin carboxyl carrier protein subunit [Pseudomonas aeruginosa PAO1]	156	Fatty acid and phospholipid metabolism,Fatty acid biosynthesis (path 1),Propanoate metabolism,Pyruvate metabolism	471	accB	16.5	1	0.11
198	PA4873	NP_253560	A0A8G2S225	N/A	Q9HUU0	Q9HUU0_PSEAE	K04046	N/A	heat-shock protein [Pseudomonas aeruginosa PAO1]	421	Chaperones heatshock protein	1266	0	46.3	2	0.07
199	PA4888	NP_253575	A0A0A8REC8	N/A	Q9HUS5	Q9HUS5_PSEAE	K22769	Biosynthesis of unsaturated fatty acids;Metabolic pathways;Fatty acid metabolism	acyl-CoA desaturase [Pseudomonas aeruginosa PAO1]	370	Fatty acid and phospholipid metabolism	1113	desB	42.7	1	0.04
200	PA4928	NP_253615	A0A8G7Q2F7	N/A	Q9HUN6	Y4928_PSEAE	N/A	N/A	hypothetical protein PA4928 [Pseudomonas aeruginosa PAO1]	747	Hypothetical unclassified unknown	2244	0	83.9	1	0.02
201	PA4929	NP_253616	A0A8G6AAF2	N/A	Q9HUN5	Q9HUN5_PSEAE	N/A	N/A	hypothetical protein PA4929 [Pseudomonas aeruginosa PAO1]	680	Membrane proteins	2043	0	75.3	1	0.03
202	PA4933	NP_253620	A0A071L159	N/A	Q9HUN1	Q9HUN1_PSEAE	N/A	N/A	hypothetical protein PA4933 [Pseudomonas aeruginosa PAO1]	289	Membrane proteins	870	0	30.4	3	0.12
203	PA4952	NP_253639	A0A072ZJM0	3.6.1.-	Q9HUL3	RSGA_PSEAE	K06949	Thiamine metabolism;Metabolic pathways	ribosome-associated GTPase [Pseudomonas aeruginosa PAO1]	339	Hypothetical unclassified unknown	1020	0	37.1	1	0.06
204	PA4996	NP_253683	A0A8G3DP96	N/A	Q9HUG9	HLDE_PSEAE	K03272	Lipopolysaccharide biosynthesis;Metabolic pathways;Biosynthesis of nucleotide sugars	bifunctional heptose 7-phosphate kinase/heptose 1-phosphate adenyltransferase [Pseudomonas aeruginosa PAO1]	474	Cell wall LPS capsule	1425	rfaE	50.3	1	0.03
205	PA5023	NP_253710	A0A8G3IG98	N/A	Q9HUE6	Y5023_PSEAE	K08997	N/A	hypothetical protein PA5023 [Pseudomonas aeruginosa PAO1]	486	Hypothetical unclassified unknown	1461	0	55	1	Could Not Be Accurately Determined
206	PA5030	NP_253717	A0A2R3J152	N/A	Q9HUD9	Q9HUD9_PSEAE	K08224	N/A	major facilitator superfamily transporter [Pseudomonas aeruginosa PAO1]	438	Membrane proteins,Transport of small molecules	1317	0	46.7	1	0.05
207	PA5032	NP_253719	A0A8G3BA23	N/A	Q9HUD7	Q9HUD7_PSEAE	N/A	N/A	transcriptional regulator [Pseudomonas aeruginosa PAO1]	357	Transcriptional regulators	1074	0	39.7	1	Could Not Be Accurately Determined
208	PA5053	NP_253740	A0A072ZK85	3.4.25.2	Q9HUC6	HSLV_PSEAE	K01419	N/A	ATP-dependent protease peptidase subunit [Pseudomonas aeruginosa PAO1]	177	Chaperones heatshock protein	534	hslV	18.8	1	0.1
209	PA5070	NP_253757	A0A069QA00	N/A	Q9HUB3	Q9HUB3_PSEAE	K03118	N/A	transporter TatC [Pseudomonas aeruginosa PAO1]	267	Membrane proteins,Transport of small molecules	804	tatC	30	1	0.09
210	PA5110	NP_253797	A0A072ZJD2	3.1.3.11	Q9HU73	F16PA_PSEAE	K03841	Glycolysis / Gluconeogenesis;Pentose phosphate pathway;Fructose and mannose metabolism;Methane metabolism;Carbon fixation in photosynthetic organisms;Metabolic pathways;Biosynthesis of secondary metabolites;Microbial metabolism in diverse environments;Carbon metabolism	fructose-1,6-bisphosphatase [Pseudomonas aeruginosa PAO1]	336	Carbon compound catabolism,Carbon fixation,Central intermediary metabolism,Fructose and mannose metabolism,Glycolysis / Gluconeogenesis,Pentose phosphate cycle	1011	fbp	37.2	1	0.06
211	PA5117	NP_253804	A0A8G4E035	N/A	Q9HU67	Q9HU67_PSEAE	K06207	N/A	regulatory protein TypA [Pseudomonas aeruginosa PAO1]	605	Adaptation protection	1818	typA	66.9	6	0.16
212	PA5120	NP_253807	A0A080VGU1	N/A	Q9HU64	Q9HU64_PSEAE	N/A	N/A	hypothetical protein PA5120 [Pseudomonas aeruginosa PAO1]	134	Hypothetical unclassified unknown	405	0	15.6	1	0.08
213	PA5143	NP_253830	A0A071LE54	4.2.1.19	Q9HU41	HIS7_PSEAE	K01693	Histidine metabolism;Metabolic pathways;Biosynthesis of secondary metabolites;Biosynthesis of amino acids	imidazoleglycerol-phosphate dehydratase [Pseudomonas aeruginosa PAO1]	197	Amino acid biosynthesis and metabolism,Histidine metabolism	594	hisB	21.9	1	0.07
214	PA5168	NP_253855	A0A8F9NKB1	N/A	Q9HU17	Q9HU17_PSEAE	K11689	Two-component system	dicarboxylate transporter [Pseudomonas aeruginosa PAO1]	210	C(4)-dicarboxylate transport,C(4)-dicarboxylate transport,Membrane proteins,Transport of small molecules	633	dctQ	23	2	0.16
215	PA5193	NP_253880	A0A072ZJR4	N/A	Q9HTZ6	HSLO_PSEAE	K04083	N/A	heat shock protein 33 [Pseudomonas aeruginosa PAO1]	297	Chaperones heatshock protein	894	yrfI	32.8	4	0.21
216	PA5197	NP_253884	A0A8G4L657	N/A	Q9HTZ2	RIMK_PSEAE	K05844	N/A	ribosomal protein S6 modification protein [Pseudomonas aeruginosa PAO1]	301	Transcription RNA processing and degradation,Translation post translation modification degradation	906	rimK	32.6	2	0.13
217	PA5230	NP_253917	A0A0A8RJC2	N/A	Q9HTW0	Q9HTW0_PSEAE	K01992	N/A	ABC transporter permease [Pseudomonas aeruginosa PAO1]	374	Membrane proteins,Transport of small molecules	1125	0	41	1	0.03
218	PA5235	NP_253922	A0A8G4GCT2	N/A	Q9HTV5	Q9HTV5_PSEAE	K02445	N/A	sn-glycerol-3-phosphate transporter [Pseudomonas aeruginosa PAO1]	448	Membrane proteins,Transport of small molecules	1347	glpT	49.3	5	0.13
219	PA5238	NP_253925	A0A8G3K1Y6	N/A	Q9HTV2	Q9HTV2_PSEAE	N/A	N/A	O-antigen acetylase [Pseudomonas aeruginosa PAO1]	662	Cell wall LPS capsule,Membrane proteins,Putative enzymes	1989	0	73.7	1	Could Not Be Accurately Determined
220	PA5241	NP_253928	A0A0F7R0K3	3.6.1.11	Q9ZN70	PPX_PSEAE	K01524	Purine metabolism;Metabolic pathways	exopolyphosphatase [Pseudomonas aeruginosa PAO1]	506	Adaptation protection,Nucleotide biosynthesis and metabolism,Purine metabolism	1521	ppx	56.4	2	0.04
221	PA5250	NP_253937	A0A077K0S4	N/A	Q9HTU4	Q9HTU4_PSEAE	N/A	N/A	hypothetical protein PA5250 [Pseudomonas aeruginosa PAO1]	252	Membrane proteins	759	0	27.5	1	0.06
222	PA5251	NP_253938	A0A0A8RJ10	N/A	Q9HTU3	Q9HTU3_PSEAE	N/A	N/A	hypothetical protein PA5251 [Pseudomonas aeruginosa PAO1]	192	Membrane proteins	579	0	21.2	1	0.06
223	PA5255	NP_253942	A0A0A8RJE4	N/A	P15275	ALGQ_PSEAE	K07740	N/A	anti-RNA polymerase sigma 70 factor [Pseudomonas aeruginosa PAO1]	160	Alginate biosynthesis,Transcriptional regulators	483	algQ	18	1	0.09
224	PA5262	NP_253949	A0A0A8RFI2	N/A	G3XCZ2	G3XCZ2_PSEAE	K08082	Two-component system	alginate biosynthesis protein AlgZ/FimS [Pseudomonas aeruginosa PAO1]	358	Motility,Two component regulatory systems,Two-component System	1077	fimS	40.1	1	0.04
225	PA5269	NP_253956	A0A072ZIW8	N/A	Q9HTT1	Q9HTT1_PSEAE	N/A	N/A	hypothetical protein PA5269 [Pseudomonas aeruginosa PAO1]	91	Hypothetical unclassified unknown	276	0	10.1	1	0.2
226	PA5277	NP_253964	A0A2R3J2G8	4.1.1.20	P19572	DCDA_PSEAE	K01586	Lysine biosynthesis;D-Amino acid metabolism;Metabolic pathways;Biosynthesis of secondary metabolites;Microbial metabolism in diverse environments;Biosynthesis of amino acids	diaminopimelate decarboxylase [Pseudomonas aeruginosa PAO1]	415	Amino acid biosynthesis and metabolism,Lysine biosynthesis	1248	lysA	45.5	2	0.04
227	PA5280	NP_253967	A0A8I1F8M7	N/A	Q51566	XERC_PSEAE	K03733	N/A	site-specific tyrosine recombinase XerC [Pseudomonas aeruginosa PAO1]	303	DNA replication recombination modification and repair	912	sss	33.9	1	0.04
228	PA5285	NP_253972	A0A071L112	N/A	Q9HTR9	Q9HTR9_PSEAE	N/A	N/A	hypothetical protein PA5285 [Pseudomonas aeruginosa PAO1]	105	Transcriptional regulators	318	sutA	11.2	1	0.13
229	PA5289	NP_253976	A0A069Q2R6	N/A	Q9HTR5	Q9HTR5_PSEAE	K09806	N/A	hypothetical protein PA5289 [Pseudomonas aeruginosa PAO1]	86	Hypothetical unclassified unknown	261	0	9.5	1	0.14
230	PA5298	NP_253985	A0A1C7BP24	2.4.2.22	Q9HTQ6	XPT_PSEAE	K03816	Purine metabolism;Metabolic pathways;Biosynthesis of secondary metabolites;Nucleotide metabolism	xanthine phosphoribosyltransferase [Pseudomonas aeruginosa PAO1]	190	Nucleotide biosynthesis and metabolism	573	0	20.6	1	0.13
231	PA5301	NP_253988	A0A072ZIS4	N/A	Q9HTQ3	Q9HTQ3_PSEAE	N/A	N/A	transcriptional regulator [Pseudomonas aeruginosa PAO1]	182	Carbon compound catabolism,Polyamine catabolism,Transcriptional regulators	549	pauR	19.9	1	0.06
232	PA5305	NP_253992	A0A071L1N2	N/A	Q9HTP9	Q9HTP9_PSEAE	K09978	N/A	hypothetical protein PA5305 [Pseudomonas aeruginosa PAO1]	114	Hypothetical unclassified unknown	345	0	11.5	2	0.26
233	PA5310	NP_253997	A0A8G2Z263	N/A	Q9HTP4	Q9HTP4_PSEAE	K06132	Glycerophospholipid metabolism;Metabolic pathways	hypothetical protein PA5310 [Pseudomonas aeruginosa PAO1]	529	Hypothetical unclassified unknown	1590	0	59.2	1	0.04
234	PA5327	NP_254014	A0A8G2QG24	N/A	Q9HTM8	Q9HTM8_PSEAE	N/A	N/A	oxidoreductase [Pseudomonas aeruginosa PAO1]	442	Putative enzymes	1329	sphC	49.4	1	0.03
235	PA5370	NP_254057	A0A072ZFB0	N/A	Q9HTJ4	Q9HTJ4_PSEAE	K03762	N/A	major facilitator superfamily transporter [Pseudomonas aeruginosa PAO1]	438	Membrane proteins,Transport of small molecules	1317	0	47	1	0.06
236	PA5426	NP_254113	A0A072ZFF8	5.4.99.18	P72157	PURE_PSEAE	K01588	Purine metabolism;Metabolic pathways;Biosynthesis of secondary metabolites	5-(carboxyamino)imidazole ribonucleotide mutase [Pseudomonas aeruginosa PAO1]	163	Nucleotide biosynthesis and metabolism,Purine metabolism	492	purE	16.9	1	0.09
237	PA5432	NP_254119	A0A069PXW5	N/A	Q9HTD4	Q9HTD4_PSEAE	N/A	N/A	acetyltransferase [Pseudomonas aeruginosa PAO1]	149	Putative enzymes	450	0	17	1	0.05
238	PA5446	NP_254133	A0A072ZGM8	N/A	Q9HTC1	Q9HTC1_PSEAE	N/A	N/A	hypothetical protein PA5446 [Pseudomonas aeruginosa PAO1]	67	Hypothetical unclassified unknown	204	0	7.9	1	0.18
239	PA5470	NP_254157	A0A7H9ZQZ1	N/A	Q9HTA0	Q9HTA0_PSEAE	K02839	N/A	peptide chain release factor-like protein [Pseudomonas aeruginosa PAO1]	204	Translation post translation modification degradation	615	0	22.3	1	0.03
240	PA5478	NP_254165	A0A071L429	N/A	Q9HT92	Q9HT92_PSEAE	N/A	N/A	hypothetical protein PA5478 [Pseudomonas aeruginosa PAO1]	409	Membrane proteins	1230	0	43	1	0.02
241	PA5489	NP_254176	A0A241XKR6	N/A	P0C2B2	DSBA_PSEAE	K03673	Cationic antimicrobial peptide (CAMP) resistance	thiol:disulfide interchange protein DsbA [Pseudomonas aeruginosa PAO1]	211	Chaperones heatshock protein,Translation post translation modification degradation	636	dsbA	23.4	1	0.04
242	PA5493	NP_254180	V6APY6	2.7.7.7	Q9HT80	DPO1_PSEAE	K02335	N/A	DNA polymerase I [Pseudomonas aeruginosa PAO1]	913	DNA replication recombination modification and repair	2742	polA	99.8	1	0.01
243	PA5494	NP_254181	A0A069PZQ1	N/A	Q9HT79	Q9HT79_PSEAE	N/A	N/A	hypothetical protein PA5494 [Pseudomonas aeruginosa PAO1]	96	Hypothetical unclassified unknown	291	0	10.8	1	0.09
244	PA5506	NP_254193	A0A0A8RJB1	N/A	Q9HT67	Q9HT67_PSEAE	N/A	N/A	hypothetical protein PA5506 [Pseudomonas aeruginosa PAO1]	285	Hypothetical unclassified unknown	858	0	32.1	1	0.04
245	PA5526	NP_254213	A0A0H2ZJN7;A0A8G1JER2	N/A	Q9HT47	Q9HT47_PSEAE	N/A	N/A	hypothetical protein PA5526 [Pseudomonas aeruginosa PAO1]	70	Hypothetical unclassified unknown	213	0	7.9	2	0.71
246	PA5559	NP_254246	A0A1C7BKP3	N/A	Q9HT15	ATPL_PSEAE	K02110	Oxidative phosphorylation;Photosynthesis;Metabolic pathways	ATP synthase subunit C [Pseudomonas aeruginosa PAO1]	85	Energy metabolism,Oxidative phosphorylation	258	atpE	8.6	1	0.13
247	PA1866a	YP_008719750	A0A8G5NCZ5	N/A	#N/A	#N/A	N/A	N/A	hypothetical protein PA1866a [Pseudomonas aeruginosa PAO1]	69	#N/A	#N/A	#N/A	#N/A	1	0.43

## Sheet: LB_sta
Protein ID	Locus_Tag	## Accession	Provided_UniProt_Accessions	Enzyme_Classification_Number	UniProtKB Accession	UniProtKB ID	KEGG_Ortholog	Pathways	Annotation	Sequence_Length	Function	Gene Length	Gene Name	Estimated MW (kDa)	CumulativePartialPeptideSequences	AverageSequenceCoverage
															LB_sta	LB_sta
1	PA0023	NP_248713	A0A8G4IQJ6	N/A	P43903	QOR_PSEAE	K00344	N/A	oxygen-dependent quinone oxidoreductase [Pseudomonas aeruginosa PAO1]	325	Energy metabolism	978	qor	35.1	1	0.09
2	PA0024	NP_248714	A0A071KXF5	1.3.3.3	P43898	HEM6_PSEAE	K00228	Porphyrin metabolism;Metabolic pathways;Biosynthesis of secondary metabolites;Biosynthesis of cofactors	coproporphyrinogen III oxidase [Pseudomonas aeruginosa PAO1]	305	Biosynthesis of cofactors, prosthetic groups and carriers,Porphyrin and chlorophyll metabolism	918	hemF	34.8	1	0.04
3	PA0086	NP_248776	A0A0H2ZK14	N/A	Q9I746	Q9I746_PSEAE	K11898	N/A	hypothetical protein PA0086 [Pseudomonas aeruginosa PAO1]	281	Hcp secretion island I (HSI-I) type VI secretion system,Protein secretion export apparatus	846	tagJ1	30.4	1	0.05
4	PA0127	NP_248817	A0A0H2ZK60	N/A	Q9I705	Q9I705_PSEAE	N/A	N/A	hypothetical protein PA0127 [Pseudomonas aeruginosa PAO1]	166	Hypothetical unclassified unknown	501	0	17.6	2	0.35
5	PA0175	NP_248865	A0A8G2RPP0	N/A	Q9I6V7	CHER2_PSEAE	K00575	Two-component system	chemotaxis protein methyltransferase [Pseudomonas aeruginosa PAO1]	280	Adaptation protection,Chemotaxis,Chemotaxis,Transcriptional regulators,Two-component System	843	cheR2	32	1	0.05
6	PA0178	NP_248868	A0A444LZ32;A0A7L5F063	2.7.13.3	Q9I6V4	Q9I6V4_PSEAE	K03407	Two-component system	two-component sensor [Pseudomonas aeruginosa PAO1]	639	Adaptation protection,Chemotaxis,Chemotaxis,Two component regulatory systems,Two-component System	1920	0	68.9	2	0.03
7	PA0179	NP_248869	A0A072ZHB7	N/A	Q9I6V3	Q9I6V3_PSEAE	K03413	Two-component system	two-component response regulator [Pseudomonas aeruginosa PAO1]	121	Adaptation protection,Chemotaxis,Chemotaxis,Two component regulatory systems,Two-component System	366	0	13.1	1	0.17
8	PA0187	NP_248877	A0A0A8RBR1	N/A	Q9I6U7	Q9I6U7_PSEAE	N/A	N/A	hypothetical protein PA0187 [Pseudomonas aeruginosa PAO1]	271	Hypothetical unclassified unknown	816	0	30.1	1	0.04
9	PA0250	NP_248941	A0A8G2RE86	N/A	Q9I6N9	Q9I6N9_PSEAE	N/A	N/A	hypothetical protein PA0250 [Pseudomonas aeruginosa PAO1]	144	Hypothetical unclassified unknown	435	0	15.7	1	0.14
10	PA0262	NP_248953	A0A8G7PKJ9	N/A	Q9I6M7	Q9I6M7_PSEAE	K11904	N/A	hypothetical protein PA0262 [Pseudomonas aeruginosa PAO1]	1019	Hypothetical unclassified unknown	3060	vgrG2b	113	1	0.01
11	PA0270	NP_248961	A0A1C7BN14	N/A	Q9I6M0	Q9I6M0_PSEAE	N/A	N/A	hypothetical protein PA0270 [Pseudomonas aeruginosa PAO1]	135	Hypothetical unclassified unknown	408	0	14.6	2	Could Not Be Accurately Determined
12	PA0283	NP_248974	A0A2R3IMI3	N/A	Q9I6K7	Q9I6K7_PSEAE	K23163	Sulfur metabolism	sulfate-binding protein [Pseudomonas aeruginosa PAO1]	332	Transport of small molecules	999	sbp	36.4	1	0.05
13	PA0290	NP_248981	A0A2R3IRB9	N/A	Q9I6K0	Q9I6K0_PSEAE	N/A	N/A	hypothetical protein PA0290 [Pseudomonas aeruginosa PAO1]	323	Hypothetical unclassified unknown	972	0	36.4	1	0.02
14	PA0309	NP_249000	A0A8G5SWJ0	N/A	Q9I6I2	Q9I6I2_PSEAE	N/A	N/A	hypothetical protein PA0309 [Pseudomonas aeruginosa PAO1]	250	Hypothetical unclassified unknown	753	0	27	1	0.1
15	PA0323	NP_249014	A0A069Q9G3	N/A	Q9I6G8	Q9I6G8_PSEAE	K11069	N/A	ABC transporter [Pseudomonas aeruginosa PAO1]	347	Transport of small molecules	1044	0	38.9	1	0.03
16	PA0327	NP_249018	A0A8G3AGG7	N/A	Q9I6G4	Q9I6G4_PSEAE	N/A	N/A	hypothetical protein PA0327 [Pseudomonas aeruginosa PAO1]	321	Hypothetical unclassified unknown	966	carP	36.2	1	0.06
17	PA0328	NP_249019	A0A8G6F5X6	N/A	Q9I6G3	Q9I6G3_PSEAE	N/A	N/A	hypothetical protein PA0328 [Pseudomonas aeruginosa PAO1]	647	Amino acid biosynthesis and metabolism	1944	aaaA	70.3	1	0.04
18	PA0329	NP_249020	A0A2R3IU33	N/A	Q9I6G2	Y329_PSEAE	K09946	N/A	hypothetical protein PA0329 [Pseudomonas aeruginosa PAO1]	110	Hypothetical unclassified unknown	333	0	11.8	1	0.25
19	PA0336	NP_249027	A0A072ZGA7	3.6.1.-	Q9X4P2	RPPH_PSEAE	K08311	N/A	RNA pyrophosphohydrolase [Pseudomonas aeruginosa PAO1]	159	Nucleotide biosynthesis and metabolism	480	rppH	18.7	4	0.58
20	PA0351	NP_249042	A0A8G2X296	N/A	Q9I6E2	Q9I6E2_PSEAE	K07095	N/A	hypothetical protein PA0351 [Pseudomonas aeruginosa PAO1]	157	Hypothetical unclassified unknown	474	0	17.2	1	0.1
21	PA0361	NP_249052	A0A8G7A7E0	N/A	Q9I6D3	Q9I6D3_PSEAE	K00681	Taurine and hypotaurine metabolism;Cyanoamino acid metabolism;Glutathione metabolism;Metabolic pathways	gamma-glutamyltranspeptidase [Pseudomonas aeruginosa PAO1]	577	Amino acid biosynthesis and metabolism,Glutathione metabolism	1734	0	62.1	1	0.02
22	PA0367	NP_249058	A0A071L591	N/A	Q9I6C7	Q9I6C7_PSEAE	N/A	N/A	transcriptional regulator [Pseudomonas aeruginosa PAO1]	215	Transcriptional regulators	648	laoR	24.5	1	0.13
23	PA0370	NP_249061	A0A080VDQ5	2.1.1.171	Q9I6C4	Q9I6C4_PSEAE	K08316	N/A	hypothetical protein PA0370 [Pseudomonas aeruginosa PAO1]	198	Hypothetical unclassified unknown	597	0	21.7	1	0.08
24	PA0382	NP_249073	A0A643IQ94	2.1.1.33	Q9I6B3	TRMB_PSEAE	K03439	N/A	tRNA (guanine-N(7)-)-methyltransferase [Pseudomonas aeruginosa PAO1]	223	DNA replication recombination modification and repair	672	micA	25.3	1	0.05
25	PA0387	NP_249078	A0A069QI28	3.6.1.66	Q9I6A8	NTPA_PSEAE	K01519	Purine metabolism;Metabolic pathways;Nucleotide metabolism	non-canonical purine NTP pyrophosphatase [Pseudomonas aeruginosa PAO1]	197	Hypothetical unclassified unknown	594	0	21.2	1	0.06
26	PA0408	NP_249099	A0A071L198	N/A	P46384	PILG_PSEAE	K02657	Two-component system	pilus biosynthesis/twitching motility protein PilG [Pseudomonas aeruginosa PAO1]	135	Chemotaxis,Chemotaxis,Motility,Pilin biosynthesis,Two component regulatory systems,Two-component System	408	pilG	14.7	1	0.08
27	PA0415	NP_249106	A0A8D9JEK7;A0A8G3AMF0	N/A	G3XD95	G3XD95_PSEAE	K06598	Two-component system	chemotaxis protein [Pseudomonas aeruginosa PAO1]	168	Chemotaxis,Chemotaxis	507	chpC	17.6	2	0.27
28	PA0447	NP_249138	A0A8G6WB18	N/A	Q9I671	Q9I671_PSEAE	K00252	Fatty acid degradation;Lysine degradation;Benzoate degradation;Tryptophan metabolism;Metabolic pathways;Biosynthesis of secondary metabolites;Microbial metabolism in diverse environments	glutaryl-CoA dehydrogenase [Pseudomonas aeruginosa PAO1]	393	Amino acid biosynthesis and metabolism,Carbon compound catabolism,Fatty acid and phospholipid metabolism,Fatty acid metabolism,Lysine degradation,Tryptophan metabolism	1182	gcdH	43.3	1	0.04
29	PA0452	NP_249143	A0A8F9NQU6	N/A	Q9I666	Q9I666_PSEAE	N/A	N/A	hypothetical protein PA0452 [Pseudomonas aeruginosa PAO1]	264	Membrane proteins	795	0	29.4	1	0.08
30	PA0473	NP_249164	A0A232BV81	N/A	Q9I645	Q9I645_PSEAE	K00799	Glutathione metabolism;Metabolic pathways	glutathione S-transferase [Pseudomonas aeruginosa PAO1]	249	Putative enzymes	750	0	28.3	1	0.06
31	PA0486	NP_249177	A0A072ZES0	2.7.11.1	Q9I632	Q9I632_PSEAE	N/A	N/A	serine/threonine protein kinase [Pseudomonas aeruginosa PAO1]	324	Hypothetical unclassified unknown	975	0	37	4	0.19
32	PA0543	NP_249234	A0A1S1CA29	N/A	Q9I5Z3	Q9I5Z3_PSEAE	K03932	N/A	hypothetical protein PA0543 [Pseudomonas aeruginosa PAO1]	322	Hypothetical unclassified unknown	969	0	35.1	1	0.03
33	PA0552	NP_249243	A0A3S0LEV4	2.7.2.3	Q9I5Y4	PGK_PSEAE	K00927	Glycolysis / Gluconeogenesis;Carbon fixation in photosynthetic organisms;Metabolic pathways;Biosynthesis of secondary metabolites;Microbial metabolism in diverse environments;Carbon metabolism;Biosynthesis of amino acids	phosphoglycerate kinase [Pseudomonas aeruginosa PAO1]	387	Carbon compound catabolism,Carbon fixation,Energy metabolism,Glycolysis / Gluconeogenesis	1164	pgk	40.4	2	0.11
34	PA0585	NP_249276	A0A8G5NBV5	N/A	Q9I5V2	Q9I5V2_PSEAE	N/A	N/A	hypothetical protein PA0585 [Pseudomonas aeruginosa PAO1]	168	Hypothetical unclassified unknown	507	0	18.7	1	0.09
35	PA0586	NP_249277	A0A4P0TIZ7	N/A	Q9I5V1	Q9I5V1_PSEAE	K06415	N/A	hypothetical protein PA0586 [Pseudomonas aeruginosa PAO1]	517	Hypothetical unclassified unknown	1554	0	60.8	6	0.18
36	PA0587	NP_249278	A0A0A8R9X4	N/A	Q9I5V0	Y587_PSEAE	K09786	N/A	hypothetical protein PA0587 [Pseudomonas aeruginosa PAO1]	423	Hypothetical unclassified unknown	1272	0	48.7	2	0.09
37	PA0596	NP_249287	A0A0H2ZLT0	N/A	Q9I5U1	Q9I5U1_PSEAE	K07102	Amino sugar and nucleotide sugar metabolism;Metabolic pathways;Biosynthesis of nucleotide sugars	hypothetical protein PA0596 [Pseudomonas aeruginosa PAO1]	338	Hypothetical unclassified unknown	1017	0	38.2	2	0.09
38	PA0624	NP_249315	A0A0H2ZKL9	N/A	G3XCX2	G3XCX2_PSEAE	N/A	N/A	hypothetical protein PA0624 [Pseudomonas aeruginosa PAO1]	114	Related to phage, transposon, or plasmid	345	0	12.5	1	0.19
39	PA0634	NP_249325	A0A0H2ZLQ3	N/A	G3XD68	G3XD68_PSEAE	N/A	N/A	hypothetical protein PA0634 [Pseudomonas aeruginosa PAO1]	115	Related to phage, transposon, or plasmid	348	0	12.9	2	0.2
40	PA0657	NP_249348	A0A8G3YSB7	N/A	Q9I5R4	Q9I5R4_PSEAE	N/A	N/A	ATPase [Pseudomonas aeruginosa PAO1]	493	Putative enzymes	1482	0	54.6	1	0.04
41	PA0662	NP_249353	A0A431XJE2	1.2.1.38	Q9I5Q9	ARGC_PSEAE	K00145	Arginine biosynthesis;Metabolic pathways;Biosynthesis of secondary metabolites;2-Oxocarboxylic acid metabolism;Biosynthesis of amino acids	N-acetyl-gamma-glutamyl-phosphate reductase [Pseudomonas aeruginosa PAO1]	344	Amino acid biosynthesis and metabolism	1035	argC	36.7	1	0.03
42	PA0727	NP_249418	A0A8G3XXR0	N/A	Q9I5K1	Q9I5K1_PSEAE	N/A	N/A	hypothetical protein PA0727 [Pseudomonas aeruginosa PAO1]	430	Related to phage, transposon, or plasmid	1293	0	49.3	1	Could Not Be Accurately Determined
43	PA0740	NP_249431	A0A8G4MYL2	N/A	Q9I5I9	Q9I5I9_PSEAE	K25227	N/A	SDS hydrolase SdsA1 [Pseudomonas aeruginosa PAO1]	658	Putative enzymes	1977	sdsA1	72.6	1	0.01
44	PA0759	NP_249450	A0A8G3Q0E8	N/A	Q9I5H0	Q9I5H0_PSEAE	K06980	N/A	hypothetical protein PA0759 [Pseudomonas aeruginosa PAO1]	314	Hypothetical unclassified unknown	945	0	33.7	1	0.04
45	PA0788	NP_249479	A0A8G2NR97	N/A	Q9I5F0	Q9I5F0_PSEAE	N/A	N/A	hypothetical protein PA0788 [Pseudomonas aeruginosa PAO1]	1041	Hypothetical unclassified unknown	3126	0	116.4	2	0.03
46	PA0795	NP_249486	A0A8G7A913	N/A	Q9I5E3	Q9I5E3_PSEAE	K01659	Propanoate metabolism;Metabolic pathways	methylcitrate synthase [Pseudomonas aeruginosa PAO1]	375	Carbon compound catabolism,Central intermediary metabolism,Citrate cycle (TCA cycle),Glyoxylate and dicarboxylate metabolism	1128	prpC	41.7	8	0.37
47	PA0808	NP_249499	A0A8F9YCY2	N/A	Q9I5D0	Q9I5D0_PSEAE	N/A	N/A	hypothetical protein PA0808 [Pseudomonas aeruginosa PAO1]	157	Hypothetical unclassified unknown	474	0	17.6	1	0.11
48	PA0832	NP_249523	A0A069Q4S3	N/A	Q9I5A8	Q9I5A8_PSEAE	K01069	Pyruvate metabolism;Metabolic pathways	hypothetical protein PA0832 [Pseudomonas aeruginosa PAO1]	213	Hypothetical unclassified unknown	642	0	23.5	1	0.05
49	PA0836	NP_249527	A0A072ZNE2	2.7.2.1	Q9I5A4	ACKA_PSEAE	K00925	Taurine and hypotaurine metabolism;Pyruvate metabolism;Propanoate metabolism;Methane metabolism;Carbon fixation pathways in prokaryotes;Metabolic pathways;Microbial metabolism in diverse environments;Carbon metabolism	acetate kinase [Pseudomonas aeruginosa PAO1]	394	Putative enzymes,Pyruvate metabolism	1185	ackA	42.4	1	0.03
50	PA0852	NP_249543	A0A6A9K1Z5	N/A	Q9I589	CBPD_PSEAE	K03933	N/A	chitin-binding protein CbpD [Pseudomonas aeruginosa PAO1]	389	Secreted factors (toxins, enzymes, alginate),Xcp type II secretion system	1170	cbpD	41.9	3	0.11
51	PA0854	NP_249545	A0A8G7HNK5	N/A	Q9I587	FUMC2_PSEAE	K01679	Citrate cycle (TCA cycle);Pyruvate metabolism;Carbon fixation pathways in prokaryotes;Metabolic pathways;Biosynthesis of secondary metabolites;Microbial metabolism in diverse environments;Carbon metabolism	fumarate hydratase [Pseudomonas aeruginosa PAO1]	464	Carbon compound catabolism,Citrate cycle (TCA cycle),Energy metabolism	1395	fumC2	49.1	1	0.02
52	PA0856	NP_249547	A0A8G2WTR6	N/A	Q9I585	Q9I585_PSEAE	K09924	N/A	hypothetical protein PA0856 [Pseudomonas aeruginosa PAO1]	182	Hypothetical unclassified unknown	549	0	20	1	0.07
53	PA0859	NP_249550	A0A072ZLI6	N/A	Q9I582	Q9I582_PSEAE	K07396	N/A	hypothetical protein PA0859 [Pseudomonas aeruginosa PAO1]	200	Hypothetical unclassified unknown	603	0	21.5	1	0.1
54	PA0870	NP_249561	A0A8B5BQ84	N/A	P43336	PHHC_PSEAE	K00832	Cysteine and methionine metabolism;Tyrosine metabolism;Phenylalanine metabolism;Phenylalanine, tyrosine and tryptophan biosynthesis;Isoquinoline alkaloid biosynthesis;Metabolic pathways;Biosynthesis of secondary metabolites;Biosynthesis of amino acids	aromatic amino acid aminotransferase [Pseudomonas aeruginosa PAO1]	399	Amino acid biosynthesis and metabolism	1200	phhC	43.3	3	0.1
55	PA0878	NP_249569	A0A069Q7L2	N/A	Q9I567	Q9I567_PSEAE	K18291	C5-Branched dibasic acid metabolism;Metabolic pathways	hypothetical protein PA0878 [Pseudomonas aeruginosa PAO1]	275	Hypothetical unclassified unknown	828	0	30.5	1	0.03
56	PA0896	NP_249587	A0A072ZN39	N/A	P80357	ASTA_PSEAE	K00673	Arginine and proline metabolism;Metabolic pathways	arginine N-succinyltransferase subunit alpha [Pseudomonas aeruginosa PAO1]	338	Amino acid biosynthesis and metabolism	1017	aruF	36.9	1	0.04
57	PA0897	NP_249588	A0A2R3J3T3	N/A	P80358	ASTG_PSEAE	K00673	Arginine and proline metabolism;Metabolic pathways	arginine N-succinyltransferase subunit beta [Pseudomonas aeruginosa PAO1]	340	Amino acid biosynthesis and metabolism	1023	aruG	37.2	2	0.12
58	PA0947	NP_249638	A0A069Q7U8	N/A	Q9I511	Q9I511_PSEAE	K10763	N/A	DNA replication initiation factor [Pseudomonas aeruginosa PAO1]	234	Hypothetical unclassified unknown	705	0	26.8	1	0.05
59	PA0952	NP_249643	A0A8G2VKN4	N/A	Q9I506	Q9I506_PSEAE	N/A	N/A	hypothetical protein PA0952 [Pseudomonas aeruginosa PAO1]	127	Hypothetical unclassified unknown	384	0	14.2	1	0.11
60	PA0959	NP_249650	A0A071L4Q2	N/A	Q9I500	Q9I500_PSEAE	N/A	N/A	hypothetical protein PA0959 [Pseudomonas aeruginosa PAO1]	209	Hypothetical unclassified unknown	630	0	23.1	2	0.11
61	PA0967	NP_249658	A0A367MH25	3.6.4.12	Q51426	RUVB_PSEAE	K03551	N/A	Holliday junction ATP-dependent DNA helicase RuvB [Pseudomonas aeruginosa PAO1]	352	DNA replication recombination modification and repair	1059	ruvB	38.9	2	0.05
62	PA0985	NP_249676	A0A8G6HH75	N/A	Q9I4Y4	Q9I4Y4_PSEAE	N/A	N/A	pyocin S5 [Pseudomonas aeruginosa PAO1]	498	Membrane proteins,Secreted factors (toxins, enzymes, alginate)	1497	pyoS5	56.1	1	0.04
63	PA0997	NP_249688	A0A072ZZD2	N/A	Q9I4X2	Q9I4X2_PSEAE	K18001	Phenazine biosynthesis;Biosynthesis of secondary metabolites	hypothetical protein PA0997 [Pseudomonas aeruginosa PAO1]	283	Biosynthesis of cofactors, prosthetic groups and carriers	852	pqsB	30.5	5	0.36
64	PA0998	NP_249689	A0A8G5UE75	N/A	Q9I4X1	Q9I4X1_PSEAE	K18002	Phenazine biosynthesis;Biosynthesis of secondary metabolites	hypothetical protein PA0998 [Pseudomonas aeruginosa PAO1]	348	Biosynthesis of cofactors, prosthetic groups and carriers	1047	pqsC	38.2	2	0.08
65	PA1000	NP_249691	A0A8G6XT19	N/A	P20581	Y1000_PSEAE	K20257	Phenazine biosynthesis;Biosynthesis of secondary metabolites	thioesterase PqsE [Pseudomonas aeruginosa PAO1]	301	Biosynthesis of cofactors, prosthetic groups and carriers	906	pqsE	34.3	1	0.05
66	PA1003	NP_249694	A0A072ZLE6	N/A	Q9I4X0	Q9I4X0_PSEAE	K19735	N/A	transcriptional regulator MvfR [Pseudomonas aeruginosa PAO1]	332	Biosynthesis of cofactors, prosthetic groups and carriers,Transcriptional regulators	999	mvfR	37.2	3	0.15
67	PA1008	NP_249699	A0A069Q709	N/A	Q9I4W5	Q9I4W5_PSEAE	K03564	N/A	bacterioferritin comigratory protein [Pseudomonas aeruginosa PAO1]	157	Adaptation protection	474	bcp	17.4	1	0.06
68	PA1009	NP_249700	A0A072ZMD9	N/A	Q9I4W4	Q9I4W4_PSEAE	K03567	N/A	hypothetical protein PA1009 [Pseudomonas aeruginosa PAO1]	185	Hypothetical unclassified unknown	558	0	20.6	1	0.05
69	PA1040	NP_249731	A0A071LDY6	N/A	Q9I4T4	Q9I4T4_PSEAE	N/A	N/A	hypothetical protein PA1040 [Pseudomonas aeruginosa PAO1]	165	Hypothetical unclassified unknown	498	0	18.7	1	0.06
70	PA1049	NP_249740	A0A2R3J356	1.4.3.5	Q9I4S5	PDXH_PSEAE	K00275	Vitamin B6 metabolism;Metabolic pathways;Microbial metabolism in diverse environments;Biosynthesis of cofactors	pyridoxine/pyridoxamine 5'-phosphate oxidase [Pseudomonas aeruginosa PAO1]	215	Biosynthesis of cofactors, prosthetic groups and carriers,Vitamin B6 metabolism	648	pdxH	24.9	1	0.08
71	PA1091	NP_249782	A0A8G2RZ47	N/A	Q9I4N8	Q9I4N8_PSEAE	N/A	N/A	flagellar glycosyl transferase FgtA [Pseudomonas aeruginosa PAO1]	1694	Hypothetical unclassified unknown	5085	fgtA	187.2	1	0
72	PA1127	NP_249818	A0A072ZLB8	N/A	Q9I4K8	Q9I4K8_PSEAE	N/A	N/A	oxidoreductase [Pseudomonas aeruginosa PAO1]	329	Adaptation protection,Putative enzymes	990	0	36.5	1	0.06
73	PA1130	NP_249821	A0A8G2YV70	N/A	Q9I4K5	Q9I4K5_PSEAE	K12990	N/A	rhamnosyltransferase [Pseudomonas aeruginosa PAO1]	325	Adaptation protection,Cell wall LPS capsule	978	rhlC	35.9	6	0.25
74	PA1131	NP_249822	A0A485ENE4	N/A	Q9I4K4	Q9I4K4_PSEAE	K08151	N/A	major facilitator superfamily transporter [Pseudomonas aeruginosa PAO1]	422	Antibiotic resistance and susceptibility,Membrane proteins,Transport of small molecules	1269	0	44.3	1	0.02
75	PA1171	NP_249862	A0A8G7D2J9	N/A	Q9I4G6	Q9I4G6_PSEAE	N/A	N/A	transglycosylase [Pseudomonas aeruginosa PAO1]	398	Cell wall LPS capsule,Putative enzymes	1197	sltB2	42.7	1	0.04
76	PA1174	NP_249865	A0A8G2VU00;A0A8G4LJ20	N/A	Q9I4G3	NAPA_PSEAE	K02567	Nitrogen metabolism;Metabolic pathways;Microbial metabolism in diverse environments	nitrate reductase catalytic subunit [Pseudomonas aeruginosa PAO1]	829	Energy metabolism,Nitrogen metabolism	2490	napA	92.9	24	0.41
77	PA1181	NP_249872	A0A1C7BEM2	N/A	Q9I4F7	Q9I4F7_PSEAE	K21084	N/A	sensor protein [Pseudomonas aeruginosa PAO1]	1120	Membrane proteins	3363	0	124.7	1	0.02
78	PA1198	NP_249889	A0A072ZLA4	N/A	Q9I4E0	Q9I4E0_PSEAE	N/A	N/A	hypothetical protein PA1198 [Pseudomonas aeruginosa PAO1]	205	Hypothetical unclassified unknown	618	0	22.3	2	0.23
79	PA1229	NP_249920	A0A8G7E203	N/A	Q9I4A9	Q9I4A9_PSEAE	N/A	N/A	transcriptional regulator [Pseudomonas aeruginosa PAO1]	268	Transcriptional regulators	807	0	29.5	1	0.03
80	PA1232	NP_249923	A0A2R3IRN9	N/A	Q9I4A6	Q9I4A6_PSEAE	N/A	N/A	hypothetical protein PA1232 [Pseudomonas aeruginosa PAO1]	679	Membrane proteins	2040	0	73.5	1	0.01
81	PA1243	NP_249934	V6AJA3	2.7.13.3	Q9I495	Q9I495_PSEAE	N/A	N/A	sensor/response regulator hybrid protein [Pseudomonas aeruginosa PAO1]	858	Two component regulatory systems,Two-component System	2577	0	93.3	1	0.02
82	PA1246	NP_249937	A0A8G6A026	N/A	Q03024	APRD_PSEAE	K12536	N/A	alkaline protease secretion ATP-binding protein AprD [Pseudomonas aeruginosa PAO1]	593	Apr type I secretion system,Protein secretion export apparatus,Secreted factors (toxins, enzymes, alginate)	1782	aprD	63.7	6	0.17
83	PA1333	NP_250024	A0A080VM83	N/A	Q9I411	Q9I411_PSEAE	N/A	N/A	hypothetical protein PA1333 [Pseudomonas aeruginosa PAO1]	68	Hypothetical unclassified unknown	207	0	7.5	1	0.13
84	PA1397	NP_250088	A0A8G5DPS3	N/A	Q9I3U7	Q9I3U7_PSEAE	N/A	N/A	two-component response regulator [Pseudomonas aeruginosa PAO1]	210	Transcriptional regulators,Two component regulatory systems,Two-component System	633	0	23	1	0.07
85	PA1402	NP_250093	A0A8G6BPS4	N/A	Q9I3U2	Q9I3U2_PSEAE	N/A	N/A	hypothetical protein PA1402 [Pseudomonas aeruginosa PAO1]	221	Hypothetical unclassified unknown	666	0	23.8	1	0.06
86	PA1419	NP_250110	A0A8A9AEX8	N/A	Q9I3S5	Q9I3S5_PSEAE	N/A	N/A	transporter [Pseudomonas aeruginosa PAO1]	503	Membrane proteins,Transport of small molecules	1512	0	53.4	1	Could Not Be Accurately Determined
87	PA1432	NP_250123	A0A0A8RK20	2.3.1.184	P33883	LASI_PSEAE	K13060	Cysteine and methionine metabolism;Metabolic pathways	acyl-homoserine-lactone synthase [Pseudomonas aeruginosa PAO1]	201	Adaptation protection	606	lasI	22.7	6	0.45
88	PA1437	NP_250128	A0A072ZL37;A0A8G3JPQ7	N/A	Q9I3R0	Q9I3R0_PSEAE	K07665	Two-component system	two-component response regulator [Pseudomonas aeruginosa PAO1]	229	Transcriptional regulators,Two component regulatory systems,Two-component System	690	0	25.8	2	0.08
89	PA1456	NP_250147	A0A060H293	N/A	Q51455	CHEY_PSEAE	K03413	Two-component system	chemotaxis protein CheY [Pseudomonas aeruginosa PAO1]	124	Chemotaxis,Transcriptional regulators,Two component regulatory systems,Two-component System	375	cheY	13.9	2	0.3
90	PA1494	NP_250185	A0A6A9K326	N/A	Q9I3L8	Q9I3L8_PSEAE	N/A	N/A	hypothetical protein PA1494 [Pseudomonas aeruginosa PAO1]	551	Transcriptional regulators	1656	muiA	60.6	2	0.06
91	PA1509	NP_250200	A0A8G4B7U7	N/A	Q9I3K3	Q9I3K3_PSEAE	N/A	N/A	hypothetical protein PA1509 [Pseudomonas aeruginosa PAO1]	380	Adaptation protection	1143	tplEi	42.4	1	0.04
92	PA1543	NP_250234	A0A071L007	2.4.2.7	Q04633	APT_PSEAE	K00759	Purine metabolism;Metabolic pathways;Nucleotide metabolism	adenine phosphoribosyltransferase [Pseudomonas aeruginosa PAO1]	182	Nucleotide biosynthesis and metabolism,Purine metabolism	549	apt	19.8	1	0.1
93	PA1562	NP_250253	A0A071LCK1	4.2.1.3	Q9I3F5	ACNA_PSEAE	K01681	Citrate cycle (TCA cycle);Glyoxylate and dicarboxylate metabolism;Carbon fixation pathways in prokaryotes;Metabolic pathways;Biosynthesis of secondary metabolites;Microbial metabolism in diverse environments;Carbon metabolism;2-Oxocarboxylic acid metabolism;Biosynthesis of amino acids	aconitate hydratase [Pseudomonas aeruginosa PAO1]	910	Citrate cycle (TCA cycle),Energy metabolism,Glyoxylate and dicarboxylate metabolism	2733	acnA	99.1	10	0.21
94	PA1563	NP_250254	A0A8D9N247	N/A	Q9I3F4	RLMM_PSEAE	K06968	N/A	23S rRNA (cytidine(2498)-2'-O)-methyltransferase RlmM [Pseudomonas aeruginosa PAO1]	352	Hypothetical unclassified unknown	1059	0	40.2	3	0.11
95	PA1578	NP_250269	A0A8G2TJU1	N/A	Q9I3D9	Q9I3D9_PSEAE	N/A	N/A	hypothetical protein PA1578 [Pseudomonas aeruginosa PAO1]	251	Hypothetical unclassified unknown	756	0	27.6	1	0.04
96	PA1601	NP_250292	A0A8G3Z4X4	N/A	Q9I3C0	Q9I3C0_PSEAE	K18030	Nicotinate and nicotinamide metabolism;Metabolic pathways;Microbial metabolism in diverse environments	aldehyde dehydrogenase [Pseudomonas aeruginosa PAO1]	748	Putative enzymes	2247	0	81.3	1	0.01
97	PA1610	NP_250301	A0A8G6LWG1	N/A	O33877	FABA_PSEAE	K01716	Fatty acid biosynthesis;Metabolic pathways;Fatty acid metabolism	3-hydroxydecanoyl-ACP dehydratase [Pseudomonas aeruginosa PAO1]	171	Fatty acid and phospholipid metabolism,Fatty acid biosynthesis (path 1)	516	fabA	18.7	1	0.12
98	PA1617	NP_250308	Q9I3A5	N/A	Q9I3A5	Q9I3A5_PSEAE	K01897	Fatty acid biosynthesis;Fatty acid degradation;Metabolic pathways;Fatty acid metabolism	AMP-binding protein [Pseudomonas aeruginosa PAO1]	555	Putative enzymes	1668	0	61.4	2	0.05
99	PA1677	NP_250368	A0A8G2PMH3	N/A	Q9I348	Q9I348_PSEAE	N/A	N/A	hypothetical protein PA1677 [Pseudomonas aeruginosa PAO1]	198	Hypothetical unclassified unknown	597	0	21	1	0.09
100	PA1678	NP_250369	A0A069Q0A9	2.1.1.298	Q9I347	PRMB_PSEAE	K07320	N/A	50S ribosomal protein L3 glutamine methyltransferase [Pseudomonas aeruginosa PAO1]	304	Putative enzymes	915	0	34.2	1	0.04
101	PA1686	NP_250377	A0A8G2RX12	N/A	Q9I339	Q9I339_PSEAE	K01247	N/A	DNA-3-methyladenine glycosidase II [Pseudomonas aeruginosa PAO1]	297	DNA replication recombination modification and repair	894	alkA	32.2	1	Could Not Be Accurately Determined
102	PA1725	NP_250416	A0A1C7BHA9	N/A	Q9I312	Q9I312_PSEAE	K03223	N/A	type III secretion system protein [Pseudomonas aeruginosa PAO1]	214	Protein secretion export apparatus,Type III Secretion	645	pscL	23.9	1	Could Not Be Accurately Determined
103	PA1729	NP_250420	A0A0A8RL53	N/A	Q9I308	Q9I308_PSEAE	N/A	N/A	hypothetical protein PA1729 [Pseudomonas aeruginosa PAO1]	215	Hypothetical unclassified unknown	648	0	24	1	0.09
104	PA1732	NP_250423	A0A8G3SY06	N/A	Q9I305	Q9I305_PSEAE	N/A	N/A	hypothetical protein PA1732 [Pseudomonas aeruginosa PAO1]	266	Hypothetical unclassified unknown	801	0	30.1	2	0.1
105	PA1828	NP_250519	A0A8G4JC79	N/A	Q9I2R7	Q9I2R7_PSEAE	N/A	N/A	short-chain dehydrogenase [Pseudomonas aeruginosa PAO1]	255	Putative enzymes	768	0	26.9	1	0.13
106	PA1835	NP_250526	A0A8G6WXC8	N/A	Q9I2R0	Q9I2R0_PSEAE	N/A	N/A	hypothetical protein PA1835 [Pseudomonas aeruginosa PAO1]	145	Hypothetical unclassified unknown	438	0	15.8	1	0.21
107	PA1838	NP_250529	A0A1C7BG32	N/A	Q9I2Q7	Q9I2Q7_PSEAE	K00381	Sulfur metabolism;Metabolic pathways;Microbial metabolism in diverse environments	sulfite reductase [Pseudomonas aeruginosa PAO1]	552	Central intermediary metabolism	1659	cysI	62.1	2	0.06
108	PA1861	NP_250552	A0A0A8RLT1;A0A8G5YQ62	N/A	Q9I2N4	MODC_PSEAE	K02017	N/A	molybdenum ABC transporter ATP-binding protein ModC [Pseudomonas aeruginosa PAO1]	361	Transport of small molecules	1086	modC	39.8	4	0.12
109	PA1864	NP_250555	A0A7M3APL9	N/A	Q9I2N1	Q9I2N1_PSEAE	K09017	N/A	transcriptional regulator [Pseudomonas aeruginosa PAO1]	216	Transcriptional regulators	651	0	23.9	1	0.07
110	PA1871	NP_250562	A0A072ZHM5	N/A	P14789	LASA_PSEAE	K08642	N/A	protease LasA [Pseudomonas aeruginosa PAO1]	418	Secreted factors (toxins, enzymes, alginate),Translation post translation modification degradation,Xcp type II secretion system	1257	lasA	45.5	3	0.11
111	PA1884	NP_250575	A0A8G6EZP4	N/A	Q9I2L3	Q9I2L3_PSEAE	N/A	N/A	transcriptional regulator [Pseudomonas aeruginosa PAO1]	183	Transcriptional regulators	552	0	20.5	1	Could Not Be Accurately Determined
112	PA1901	NP_250592	A0A8G5QKT5	N/A	Q7DC82	Q7DC82_PSEAE	K01626	Phenylalanine, tyrosine and tryptophan biosynthesis;Metabolic pathways;Biosynthesis of secondary metabolites;Biosynthesis of amino acids	phenazine biosynthesis protein PhzC [Pseudomonas aeruginosa PAO1]	405	Phenazine biosynthesis,Secreted factors (toxins, enzymes, alginate)	1218	phzC2	44.3	1	0.03
113	PA1903	NP_250594	A0A8G3WZV7	N/A	Q7DC81	Q7DC81_PSEAE	K13063	Phenazine biosynthesis;Metabolic pathways;Biosynthesis of secondary metabolites	phenazine biosynthesis protein PhzE [Pseudomonas aeruginosa PAO1]	627	Phenazine biosynthesis,Secreted factors (toxins, enzymes, alginate)	1884	phzE2	69	2	0.04
114	PA1904	NP_250595	A0A8G7CYQ1	N/A	O69754	PHZF_PSEAE	K06998	Phenazine biosynthesis;Metabolic pathways;Biosynthesis of secondary metabolites	trans-2,3-dihydro-3-hydroxyanthranilate isomerase [Pseudomonas aeruginosa PAO1]	278	Phenazine biosynthesis,Secreted factors (toxins, enzymes, alginate)	837	phzF2	30.3	1	0.06
115	PA1913	NP_250603	A0A8G3WZ30	N/A	Q9I2J1	Q9I2J1_PSEAE	N/A	N/A	hypothetical protein PA1913 [Pseudomonas aeruginosa PAO1]	226	Hypothetical unclassified unknown	681	0	25.4	3	0.19
116	PA1939	NP_250629	Q9I2G5	N/A	Q9I2G5	Q9I2G5_PSEAE	N/A	N/A	hypothetical protein PA1939 [Pseudomonas aeruginosa PAO1]	665	Hypothetical unclassified unknown	1998	0	73.8	1	0.02
117	PA1967	NP_250657	A0A8G1JNE7	N/A	Q9I2D7	Q9I2D7_PSEAE	N/A	N/A	hypothetical protein PA1967 [Pseudomonas aeruginosa PAO1]	166	Hypothetical unclassified unknown	501	0	18.3	1	Could Not Be Accurately Determined
118	PA1984	NP_250674	A0A8G6CDU5;A0A8G8JRG7	N/A	Q9I2C4	Q9I2C4_PSEAE	K00138	Glycolysis / Gluconeogenesis;Pyruvate metabolism;Metabolic pathways;Biosynthesis of secondary metabolites;Microbial metabolism in diverse environments	NAD+ dependent aldehyde dehydrogenase ExaC [Pseudomonas aeruginosa PAO1]	506	ethanol oxidation pathway,Putative enzymes	1521	exaC	54.9	14	0.57
119	PA1999	NP_250689	A0A069QH78	2.8.3.6	Q9I2B0	Q9I2B0_PSEAE	K01028	Valine, leucine and isoleucine degradation;Butanoate metabolism;Metabolic pathways	dehydrocarnitine CoA transferase subunit A [Pseudomonas aeruginosa PAO1]	232	Amino acid biosynthesis and metabolism,Butanoate metabolism,Carbon compound catabolism,Valine, leucine and isoleucine degradation	699	dhcA	25.2	2	0.17
120	PA2000	NP_250690	V6AGD5	2.8.3.6	Q9I2A9	Q9I2A9_PSEAE	K01029	Valine, leucine and isoleucine degradation;Butanoate metabolism;Metabolic pathways	dehydrocarnitine CoA transferase subunit B [Pseudomonas aeruginosa PAO1]	218	Amino acid biosynthesis and metabolism,Butanoate metabolism,Carbon compound catabolism,Valine, leucine and isoleucine degradation	657	dhcB	23.2	1	0.08
121	PA2001	NP_250691	A0A8G8GLN2	N/A	Q9I2A8	ATOB_PSEAE	K00626	Fatty acid degradation;Valine, leucine and isoleucine degradation;Lysine degradation;Benzoate degradation;Tryptophan metabolism;Pyruvate metabolism;Glyoxylate and dicarboxylate metabolism;Butanoate metabolism;Carbon fixation pathways in prokaryotes;Terpenoid backbone biosynthesis;Metabolic pathways;Biosynthesis of secondary metabolites;Microbial metabolism in diverse environments;Carbon metabolis…	acetyl-CoA acetyltransferase [Pseudomonas aeruginosa PAO1]	393	Butanoate metabolism,Central intermediary metabolism,Fatty acid and phospholipid metabolism,Fatty acid biosynthesis (path 2),Fatty acid metabolism,Lysine degradation,Propanoate metabolism,Pyruvate metabolism,Tryptophan metabolism	1182	atoB	40.4	6	0.34
122	PA2008	NP_250698	A0A8G7ATL5	N/A	Q9I2A2	Q9I2A2_PSEAE	K01555	Tyrosine metabolism;Metabolic pathways;Microbial metabolism in diverse environments	fumarylacetoacetase [Pseudomonas aeruginosa PAO1]	432	Aromatic compound catabolism,Carbon compound catabolism	1299	fahA	46.3	1	0.03
123	PA2015	NP_250705	A0A087L8W1	N/A	Q9I296	Q9I296_PSEAE	K00253	Valine, leucine and isoleucine degradation;Metabolic pathways	isovaleryl-CoA dehydrogenase [Pseudomonas aeruginosa PAO1]	387	Acyclic isoprenoid catabolism,Carbon compound catabolism	1164	liuA	42.2	1	0.06
124	PA2025	NP_250715	A0A073A061	N/A	P23189	GSHR_PSEAE	K00383	Glutathione metabolism;Metabolic pathways	glutathione reductase [Pseudomonas aeruginosa PAO1]	451	Amino acid biosynthesis and metabolism,Biosynthesis of cofactors, prosthetic groups and carriers,Glutamate metabolism,Glutathione metabolism	1356	gor	49.2	1	0.07
125	PA2033	NP_250723	A0A0A8RM83;A0A2R3IXY6	N/A	Q9I282	Q9I282_PSEAE	N/A	N/A	hypothetical protein PA2033 [Pseudomonas aeruginosa PAO1]	302	Hypothetical unclassified unknown	909	0	33.6	7	0.31
126	PA2047	NP_250737	A0A7L5EYZ9	N/A	Q9I268	Q9I268_PSEAE	N/A	N/A	transcriptional regulator [Pseudomonas aeruginosa PAO1]	329	Transcriptional regulators	990	cmrA	36.6	1	0.05
127	PA2054	NP_250744	A0A367M5H8	N/A	Q9I261	Q9I261_PSEAE	K11921	N/A	DNA-binding transcriptional regulator CynR [Pseudomonas aeruginosa PAO1]	295	Transcriptional regulators	888	cynR	32.5	4	0.06
128	PA2059	NP_250749	A0A485HJY4	N/A	Q9I256	Q9I256_PSEAE	K13894	N/A	ABC transporter permease [Pseudomonas aeruginosa PAO1]	357	Membrane proteins,Transport of small molecules	1074	sppB	38.4	1	Could Not Be Accurately Determined
129	PA2062	NP_250752	A0A8B5AWK1	N/A	Q9I253	Q9I253_PSEAE	K04487	Thiamine metabolism;Metabolic pathways;Biosynthesis of cofactors	pyridoxal-phosphate dependent protein [Pseudomonas aeruginosa PAO1]	393	Putative enzymes	1182	0	41.5	6	0.28
130	PA2069	NP_250759	A0A8G1QAP1	N/A	Q9I246	Q9I246_PSEAE	K00612	N/A	carbamoyl transferase [Pseudomonas aeruginosa PAO1]	574	Putative enzymes	1725	0	63.4	7	0.18
131	PA2072	NP_250762	A0A6A9JYJ9	N/A	Q9I243	Q9I243_PSEAE	N/A	N/A	hypothetical protein PA2072 [Pseudomonas aeruginosa PAO1]	864	Membrane proteins	2595	0	95.1	1	0.02
132	PA2114	NP_250804	A0A0A8RS04	N/A	Q9I201	Q9I201_PSEAE	N/A	N/A	major facilitator superfamily transporter [Pseudomonas aeruginosa PAO1]	423	Membrane proteins,Transport of small molecules	1272	0	45.7	2	0.07
133	PA2116	NP_250806	A0A8G2RSN1	N/A	Q9I1Z9	Y2116_PSEAE	N/A	N/A	hypothetical protein PA2116 [Pseudomonas aeruginosa PAO1]	265	Hypothetical unclassified unknown	798	0	29.2	2	0.09
134	PA2166	NP_250856	A0A8G7NXZ1	N/A	Q9I1U9	Q9I1U9_PSEAE	N/A	N/A	hypothetical protein PA2166 [Pseudomonas aeruginosa PAO1]	121	Hypothetical unclassified unknown	366	0	14	2	0.21
135	PA2197	NP_250887	A0A8G6Z6L3	N/A	Q9I1S0	Q9I1S0_PSEAE	K23256	N/A	hypothetical protein PA2197 [Pseudomonas aeruginosa PAO1]	345	Putative enzymes	1038	0	37.1	1	0.06
136	PA2199	NP_250889	A0A8G6A6H6	N/A	Q9I1R8	Q9I1R8_PSEAE	N/A	N/A	dehydrogenase [Pseudomonas aeruginosa PAO1]	291	Putative enzymes	876	0	30.9	1	0.04
137	PA2220	NP_250910	A0A6A9K8E1	N/A	Q01610	OPRR_PSEAE	N/A	N/A	transcriptional regulator [Pseudomonas aeruginosa PAO1]	306	Transcriptional regulators	921	0	34	1	0.05
138	PA2223	NP_250913	A0A8B4ZA70	N/A	Q9I1P6	Q9I1P6_PSEAE	N/A	N/A	hypothetical protein PA2223 [Pseudomonas aeruginosa PAO1]	339	Hypothetical unclassified unknown	1020	0	37.7	1	0.05
139	PA2253	NP_250943	V6AG24	N/A	Q9I1L6	Q9I1L6_PSEAE	K01424	Alanine, aspartate and glutamate metabolism;Cyanoamino acid metabolism;Metabolic pathways;Biosynthesis of secondary metabolites	L-asparaginase I [Pseudomonas aeruginosa PAO1]	328	Alanine and Aspartate metabolism,Amino acid biosynthesis and metabolism,Cyanoamino acid metabolism,Nitrogen metabolism	987	ansA	34.8	1	0.05
140	PA2281	NP_250971	A0A0A8RN76	N/A	Q9I1J4	Q9I1J4_PSEAE	N/A	N/A	transcriptional regulator [Pseudomonas aeruginosa PAO1]	284	Transcriptional regulators	855	0	31.8	1	0.08
141	PA2301	NP_250991	A0A8G6Z5U2	N/A	Q9I1H4	Q9I1H4_PSEAE	N/A	N/A	hypothetical protein PA2301 [Pseudomonas aeruginosa PAO1]	180	Hypothetical unclassified unknown	543	0	19.3	1	0.08
142	PA2316	NP_251006	A0A8G8ETT7	N/A	Q9I1F9	Q9I1F9_PSEAE	N/A	N/A	transcriptional regulator [Pseudomonas aeruginosa PAO1]	297	Transcriptional regulators	894	0	33.3	2	0.07
143	PA2317	NP_251007	A0A2R3IRS4	N/A	Q9I1F8	Q9I1F8_PSEAE	K09471	Arginine and proline metabolism;Metabolic pathways	oxidoreductase [Pseudomonas aeruginosa PAO1]	432	Putative enzymes	1299	0	47.9	2	0.07
144	PA2330	NP_251020	A0A8G2KSD1	N/A	Q9I1E8	Q9I1E8_PSEAE	N/A	N/A	hypothetical protein PA2330 [Pseudomonas aeruginosa PAO1]	355	Hypothetical unclassified unknown	1068	0	37.7	2	0.08
145	PA2331	NP_251021	A0A069Q5G6	N/A	Q9I1E7	Q9I1E7_PSEAE	N/A	N/A	hypothetical protein PA2331 [Pseudomonas aeruginosa PAO1]	186	Membrane proteins	561	0	19.9	1	0.06
146	PA2334	NP_251024	A0A080VVQ5	N/A	Q9I1E4	Q9I1E4_PSEAE	N/A	N/A	transcriptional regulator [Pseudomonas aeruginosa PAO1]	303	Transcriptional regulators	912	0	33.7	1	0.02
147	PA2359	NP_251049	A0A0H2ZDQ6	N/A	Q9I1C0	Q9I1C0_PSEAE	K11917	N/A	transcriptional regulator [Pseudomonas aeruginosa PAO1]	361	Transcriptional regulators	1086	0	40.1	1	Could Not Be Accurately Determined
148	PA2371	NP_251061	A0A659BAP3	N/A	Q9I1A8	Q9I1A8_PSEAE	K11907	N/A	ClpA/B-type protease [Pseudomonas aeruginosa PAO1]	849	Translation post translation modification degradation	2550	clpV3	92.4	3	0.08
149	PA2425	NP_251115	A0A8G2TA85	N/A	Q9I156	Q9I156_PSEAE	N/A	N/A	pyoverdine biosynthesis protein PvdG [Pseudomonas aeruginosa PAO1]	254	Adaptation protection,Pyoverdine synthesis	765	pvdG	27.9	1	0.04
150	PA2426	NP_251116	A0A8G3M2Z0	N/A	G3XCV1	G3XCV1_PSEAE	N/A	N/A	extracytoplasmic-function sigma-70 factor [Pseudomonas aeruginosa PAO1]	187	Transcriptional regulators	564	pvdS	21.2	1	0.07
151	PA2504	NP_251194	A0A072ZPC1	N/A	Q9I0X8	Q9I0X8_PSEAE	N/A	N/A	hypothetical protein PA2504 [Pseudomonas aeruginosa PAO1]	205	Hypothetical unclassified unknown	618	0	22.8	3	0.2
152	PA2534	NP_251224	A0A8G4AUQ9	N/A	Q9I0V0	Q9I0V0_PSEAE	N/A	N/A	transcriptional regulator [Pseudomonas aeruginosa PAO1]	303	Transcriptional regulators	912	0	33.6	1	0.03
153	PA2535	NP_251225	A0A8G6L0B5	N/A	Q9I0U9	Q9I0U9_PSEAE	N/A	N/A	oxidoreductase [Pseudomonas aeruginosa PAO1]	331	Putative enzymes	996	0	36.3	1	0.04
154	PA2544	NP_251234	A0A3S0L8X3;A0A5F1BPN8	N/A	Q9I0U0	Q9I0U0_PSEAE	N/A	N/A	hypothetical protein PA2544 [Pseudomonas aeruginosa PAO1]	237	Hypothetical unclassified unknown	714	0	26.9	7	0.34
155	PA2553	NP_251243	A0A6A9JY95;A0A8A4FV89	N/A	Q9I0T1	Q9I0T1_PSEAE	K00626	Fatty acid degradation;Valine, leucine and isoleucine degradation;Lysine degradation;Benzoate degradation;Tryptophan metabolism;Pyruvate metabolism;Glyoxylate and dicarboxylate metabolism;Butanoate metabolism;Carbon fixation pathways in prokaryotes;Terpenoid backbone biosynthesis;Metabolic pathways;Biosynthesis of secondary metabolites;Microbial metabolism in diverse environments;Carbon metabolis…	acyl-CoA thiolase [Pseudomonas aeruginosa PAO1]	396	Putative enzymes	1191	0	41.4	10	0.45
156	PA2556	NP_251246	A0A8G2KCM6	N/A	Q9I0S8	Q9I0S8_PSEAE	N/A	N/A	transcriptional regulator [Pseudomonas aeruginosa PAO1]	361	Transcriptional regulators	1086	0	40.6	1	0.02
157	PA2564	NP_251254	A0A0C7CYG8	N/A	Q9I0S1	TAM_PSEAE	K00598	N/A	trans-aconitate 2-methyltransferase [Pseudomonas aeruginosa PAO1]	275	Hypothetical unclassified unknown	828	0	31.7	1	0.08
158	PA2566	NP_251256	A0A8G2WIL1	N/A	Q9I0R9	Q9I0R9_PSEAE	K17218	Sulfur metabolism;Microbial metabolism in diverse environments	hypothetical protein PA2566 [Pseudomonas aeruginosa PAO1]	395	Hypothetical unclassified unknown	1188	0	44.5	3	0.15
159	PA2572	NP_251262	A0A077JUP3	N/A	Q9I0R4	Q9I0R4_PSEAE	N/A	N/A	two-component response regulator [Pseudomonas aeruginosa PAO1]	447	Transcriptional regulators,Two component regulatory systems,Two-component System	1344	0	50.8	4	0.15
160	PA2578	NP_251268	A0A8A9AAR7	N/A	Q9I0Q8	Q9I0Q8_PSEAE	N/A	N/A	acetyltransferase [Pseudomonas aeruginosa PAO1]	186	Putative enzymes	561	0	21	1	Could Not Be Accurately Determined
161	PA2587	NP_251277	A0A8G5DRE9	N/A	Q9I0Q0	PQSH_PSEAE	K17940	Phenazine biosynthesis;Biosynthesis of secondary metabolites	2-heptyl-3-hydroxy-4(1H)-quinolone synthase [Pseudomonas aeruginosa PAO1]	382	Aromatic compound catabolism,Biosynthesis of cofactors, prosthetic groups and carriers,Quorum sensing	1149	pqsH	42.1	3	0.17
162	PA2588	NP_251278	A0A4U9N9P3	N/A	Q9I0P9	Q9I0P9_PSEAE	N/A	N/A	transcriptional regulator [Pseudomonas aeruginosa PAO1]	342	Transcriptional regulators	1029	0	39.1	1	0.03
163	PA2598	NP_251288	A0A080VJN7	N/A	Q9I0N9	Q9I0N9_PSEAE	K04091	Sulfur metabolism;Metabolic pathways	hypothetical protein PA2598 [Pseudomonas aeruginosa PAO1]	360	Hypothetical unclassified unknown	1083	0	39.3	1	0.03
164	PA2612	NP_251302	A0A0A8RTY1	6.1.1.11	Q9I0M6	SYS_PSEAE	K01875	N/A	serine--tRNA ligase [Pseudomonas aeruginosa PAO1]	426	Amino acid biosynthesis and metabolism,Aminoacyl-tRNA biosynthesis,Glycine, serine and threonine metabolism,Translation post translation modification degradation	1281	serS	47.2	1	0.03
165	PA2665	NP_251355	A0A8G2RMZ5	N/A	Q9I0H3	Q9I0H3_PSEAE	K12266	N/A	anaerobic nitric oxide reductase transcriptional regulator [Pseudomonas aeruginosa PAO1]	517	Adaptation protection,Transcriptional regulators	1554	fhpR	57.4	1	0.05
166	PA2683	NP_251373	A0A8G6W2K9	N/A	Q9I0F5	Q9I0F5_PSEAE	K22589	N/A	serine/threonine dehydratase [Pseudomonas aeruginosa PAO1]	320	Amino acid biosynthesis and metabolism,Glycine, serine and threonine metabolism	963	0	34	2	0.1
167	PA2695	NP_251385	A0A8G7AK43	N/A	Q9I0E7	Q9I0E7_PSEAE	N/A	N/A	hypothetical protein PA2695 [Pseudomonas aeruginosa PAO1]	367	Hypothetical unclassified unknown	1104	0	40.2	1	0.05
168	PA2720	NP_251410	A0A8G4UFY6	N/A	Q9I0C2	Q9I0C2_PSEAE	N/A	N/A	hypothetical protein PA2720 [Pseudomonas aeruginosa PAO1]	212	Hypothetical unclassified unknown	639	0	23.8	1	0.05
169	PA2771	NP_251461	A0A8G2VH12	N/A	Q9I072	Q9I072_PSEAE	N/A	N/A	hypothetical protein PA2771 [Pseudomonas aeruginosa PAO1]	341	Motility	1026	0	38	1	0.04
170	PA2787	NP_251477	A6V426	N/A	Q9I056	Q9I056_PSEAE	K01295	N/A	glutamate carboxypeptidase [Pseudomonas aeruginosa PAO1]	412	Central intermediary metabolism	1239	cpg2	44	1	0.03
171	PA2796	NP_251486	A0A073A5M0	2.2.1.2	Q9I047	TAL_PSEAE	K00616	Pentose phosphate pathway;Metabolic pathways;Biosynthesis of secondary metabolites;Microbial metabolism in diverse environments;Carbon metabolism;Biosynthesis of amino acids	transaldolase B [Pseudomonas aeruginosa PAO1]	307	Carbon compound catabolism,Energy metabolism,Pentose phosphate cycle	924	tal	33.9	3	0.2
172	PA2798	NP_251488	A0A069QKL1	N/A	Q9I045	Q9I045_PSEAE	K07315	N/A	two-component response regulator [Pseudomonas aeruginosa PAO1]	394	Transcriptional regulators,Two component regulatory systems,Two-component System	1185	0	43.5	1	0.04
173	PA2806	NP_251496	A0A8G3AF11	N/A	Q9I037	QUEF_PSEAE	K06879	Folate biosynthesis;Metabolic pathways	7-cyano-7-deazaguanine reductase [Pseudomonas aeruginosa PAO1]	276	Hypothetical unclassified unknown	831	0	30.8	1	0.04
174	PA2813	NP_251503	A0A8G7SHZ2	N/A	Q9I030	Q9I030_PSEAE	K00799	Glutathione metabolism;Metabolic pathways	glutathione S-transferase [Pseudomonas aeruginosa PAO1]	206	Central intermediary metabolism	621	0	23.4	2	0.21
175	PA2818	NP_251508	A0A080VEF6	3.1.4.52	Q9I025	Q9I025_PSEAE	K26148	N/A	aminoglycoside response regulator [Pseudomonas aeruginosa PAO1]	525	Antibiotic resistance and susceptibility,Nucleotide biosynthesis and metabolism	1578	arr	57.4	2	0.06
176	PA2821	NP_251511	A0A8G4LKP5	N/A	Q9I022	Q9I022_PSEAE	K00799	Glutathione metabolism;Metabolic pathways	glutathione S-transferase [Pseudomonas aeruginosa PAO1]	220	Central intermediary metabolism	663	0	24.7	2	0.25
177	PA2839	NP_251529	A0A8G3EXR3	N/A	Q9I004	Q9I004_PSEAE	K15777	Betalain biosynthesis;Metabolic pathways;Biosynthesis of secondary metabolites	hypothetical protein PA2839 [Pseudomonas aeruginosa PAO1]	256	Hypothetical unclassified unknown	771	0	28.2	1	0.06
178	PA2899	NP_251589	A0A073A539	N/A	Q9HZU8	Q9HZU8_PSEAE	K07687	Two-component system	transcriptional regulator [Pseudomonas aeruginosa PAO1]	212	Transcriptional regulators	639	atvR	23.2	1	0.09
179	PA2927	NP_251617	A0A8G1KA11	N/A	Q9HZS0	Q9HZS0_PSEAE	N/A	N/A	hypothetical protein PA2927 [Pseudomonas aeruginosa PAO1]	443	Hypothetical unclassified unknown	1332	plaB	49.5	4	0.12
180	PA2939	NP_251629	A0A3M5EDF2	N/A	Q9HZQ8	LAP_PSEAE	N/A	N/A	aminopeptidase [Pseudomonas aeruginosa PAO1]	536	Secreted factors (toxins, enzymes, alginate),Xcp type II secretion system	1611	0	57.5	2	0.13
181	PA2948	NP_251638	A0A3M5D2G1	N/A	Q9HZP9	COBM_PSEAE	K05936	Porphyrin metabolism;Metabolic pathways;Biosynthesis of cofactors	precorrin-4 C(11)-methyltransferase [Pseudomonas aeruginosa PAO1]	250	Biosynthesis of cofactors, prosthetic groups and carriers,Cobalamin biosynthesis	753	cobM	27	1	Could Not Be Accurately Determined
182	PA2955	NP_251645	A0A8G5TBU5	N/A	Q9HZP3	Q9HZP3_PSEAE	N/A	N/A	hypothetical protein PA2955 [Pseudomonas aeruginosa PAO1]	210	Hypothetical unclassified unknown	633	0	23.7	2	0.14
183	PA2968	NP_251658	A0A8D9JH56	N/A	G3XCZ6	G3XCZ6_PSEAE	K00645	Fatty acid biosynthesis;Prodigiosin biosynthesis;Metabolic pathways;Biosynthesis of secondary metabolites;Fatty acid metabolism	malonyl CoA-ACP transacylase [Pseudomonas aeruginosa PAO1]	312	Fatty acid and phospholipid metabolism	939	fabD	32.4	1	0.06
184	PA3005	NP_251695	A0A8G3XX37	N/A	Q9HZK0	NAGZ_PSEAE	K01207	Amino sugar and nucleotide sugar metabolism;Glycosaminoglycan degradation;Metabolic pathways;beta-Lactam resistance	beta-hexosaminidase [Pseudomonas aeruginosa PAO1]	332	Amino acid biosynthesis and metabolism,Antibiotic resistance and susceptibility,Putative enzymes	999	nagZ	36.1	1	0.03
185	PA3022	NP_251712	A0A8G2WE76	N/A	Q9HZI4	Q9HZI4_PSEAE	K07140	N/A	hypothetical protein PA3022 [Pseudomonas aeruginosa PAO1]	268	Hypothetical unclassified unknown	807	0	29.6	3	0.19
186	PA3083	NP_251773	A0A8G4RA60	N/A	Q9HZC5	Q9HZC5_PSEAE	K01256	Glutathione metabolism;Metabolic pathways	aminopeptidase [Pseudomonas aeruginosa PAO1]	885	Translation post translation modification degradation	2658	pepN	100	1	0.01
187	PA3084	NP_251774	A0A5E5R930	N/A	Q9HZC4	Q9HZC4_PSEAE	N/A	N/A	hypothetical protein PA3084 [Pseudomonas aeruginosa PAO1]	266	Hypothetical unclassified unknown	801	0	30	2	0.15
188	PA3172	NP_251862	A0A069QKB2	N/A	Q9HZ62	GPH2_PSEAE	K22292	Amino sugar and nucleotide sugar metabolism;Metabolic pathways;Biosynthesis of nucleotide sugars	phosphoglycolate phosphatase [Pseudomonas aeruginosa PAO1]	226	Putative enzymes	681	0	24.9	1	0.09
189	PA3187	NP_251877	A0A0C6F6K2;A0A8G5UZH9	N/A	Q9HZ51	Q9HZ51_PSEAE	K10112	N/A	ABC transporter ATP-binding protein [Pseudomonas aeruginosa PAO1]	386	Transport of small molecules	1161	0	42.2	21	0.55
190	PA3190	NP_251880	A0A072ZRA4	N/A	Q9HZ48	Q9HZ48_PSEAE	K17315	N/A	sugar ABC transporter substrate-binding protein [Pseudomonas aeruginosa PAO1]	420	Transport of small molecules	1263	0	45.1	1	0.05
191	PA3192	NP_251882	A0A8G4HBN6	N/A	G3XCY6	G3XCY6_PSEAE	K02483	N/A	two-component response regulator GltR [Pseudomonas aeruginosa PAO1]	242	Glycolysis / Gluconeogenesis,Transcriptional regulators,Two component regulatory systems,Two-component System	729	gltR	27.4	1	0.05
192	PA3199	NP_251889	A0A8G3T6H9	N/A	Q9HZ41	Q9HZ41_PSEAE	N/A	N/A	hypothetical protein PA3199 [Pseudomonas aeruginosa PAO1]	209	Hypothetical unclassified unknown	630	0	23.1	1	0.03
193	PA3215	NP_251905	A0A367M2J8	N/A	Q9HZ25	Q9HZ25_PSEAE	N/A	N/A	transcriptional regulator [Pseudomonas aeruginosa PAO1]	337	Transcriptional regulators	1014	0	38.4	1	0.03
194	PA3233	NP_251923	A0A8A9ANR1	N/A	Q9HZ07	Q9HZ07_PSEAE	K07182	N/A	hypothetical protein PA3233 [Pseudomonas aeruginosa PAO1]	599	Hypothetical unclassified unknown	1800	0	66.6	2	0.04
195	PA3254	NP_251944	A0A080VG67	N/A	Q9HYY6	Q9HYY6_PSEAE	K02052	N/A	ABC transporter ATP-binding protein [Pseudomonas aeruginosa PAO1]	331	Transport of small molecules	996	0	36.2	1	0.04
196	PA3300	NP_251990	A0A8G4B4G8	N/A	Q9HYU3	Q9HYU3_PSEAE	K01897	Fatty acid biosynthesis;Fatty acid degradation;Metabolic pathways;Fatty acid metabolism	long-chain-fatty-acid--CoA ligase [Pseudomonas aeruginosa PAO1]	562	Fatty acid and phospholipid metabolism,Fatty acid metabolism	1689	fadD2	61.7	2	0.08
197	PA3306	NP_251996	A0A072ZRQ3	N/A	Q9HYT8	Q9HYT8_PSEAE	N/A	N/A	hypothetical protein PA3306 [Pseudomonas aeruginosa PAO1]	200	Hypothetical unclassified unknown	603	0	23.2	1	0.07
198	PA3313	NP_252003	A0A0A8RFZ0	N/A	Q9HYT1	Q9HYT1_PSEAE	K02044	N/A	hypothetical protein PA3313 [Pseudomonas aeruginosa PAO1]	335	Transport of small molecules	1008	0	36.5	1	0.05
199	PA3327	NP_252017	A0A8F8WKX8;A0A8G4KE98	N/A	Q9HYR8	Q9HYR8_PSEAE	N/A	N/A	non-ribosomal peptide synthetase [Pseudomonas aeruginosa PAO1]	2352	Adaptation protection	7059	0	259.4	8	0.05
200	PA3328	NP_252018	A0A069QFY9	N/A	Q9HYR7	Q9HYR7_PSEAE	N/A	N/A	FAD-dependent monooxygenase [Pseudomonas aeruginosa PAO1]	388	Putative enzymes	1167	0	42.5	1	0.04
201	PA3330	NP_252020	A0A8G1KAX0	N/A	Q9HYR5	Q9HYR5_PSEAE	N/A	N/A	short-chain dehydrogenase [Pseudomonas aeruginosa PAO1]	304	Putative enzymes	915	0	32	3	0.18
202	PA3331	NP_252021	A0A8D9JLE1	N/A	Q9HYR4	Q9HYR4_PSEAE	N/A	N/A	cytochrome P450 [Pseudomonas aeruginosa PAO1]	418	Adaptation protection,Carbon compound catabolism	1257	0	46.3	2	0.09
203	PA3333	NP_252023	A0A8G2KSU6	N/A	Q9HYR2	FABH_PSEAE	K00648	Fatty acid biosynthesis;Metabolic pathways;Fatty acid metabolism	3-oxoacyl-ACP synthase III [Pseudomonas aeruginosa PAO1]	330	Fatty acid and phospholipid metabolism,Fatty acid biosynthesis (path 1)	993	fabH2	34	3	0.16
204	PA3342	NP_252032	A0A080VH47	N/A	Q9HYQ3	Q9HYQ3_PSEAE	N/A	N/A	hypothetical protein PA3342 [Pseudomonas aeruginosa PAO1]	338	Membrane proteins	1017	0	38.8	1	0.04
205	PA3401	NP_252091	A0A080VZ32	N/A	Q9HYK3	Q9HYK3_PSEAE	K01992	N/A	hypothetical protein PA3401 [Pseudomonas aeruginosa PAO1]	390	Membrane proteins	1173	0	42.7	1	0.05
206	PA3424	NP_252114	A0A8G4AJ61	N/A	Q9HYI1	Q9HYI1_PSEAE	N/A	N/A	hypothetical protein PA3424 [Pseudomonas aeruginosa PAO1]	468	Hypothetical unclassified unknown	1407	0	52.2	1	0.05
207	PA3458	NP_252148	A0A0A8RFG8	N/A	Q9HYE8	Q9HYE8_PSEAE	N/A	N/A	transcriptional regulator [Pseudomonas aeruginosa PAO1]	157	Transcriptional regulators	474	0	17.6	1	0.06
208	PA3476	NP_252166	A0A8G6XW55	N/A	P54291	RHLI_PSEAE	K13061	Cysteine and methionine metabolism;Metabolic pathways;Two-component system	acyl-homoserine-lactone synthase [Pseudomonas aeruginosa PAO1]	201	Adaptation protection	606	rhlI	22.6	3	0.11
209	PA3477	NP_252167	A0A8G5NGU3	N/A	P54292	RHLR_PSEAE	K18099	N/A	transcriptional regulator RhlR [Pseudomonas aeruginosa PAO1]	241	Transcriptional regulators	726	rhlR	27.6	13	0.79
210	PA3478	NP_252168	A0A367M7Z6	N/A	Q9HYD1	Q9HYD1_PSEAE	K18101	N/A	rhamnosyltransferase subunit B [Pseudomonas aeruginosa PAO1]	426	Secreted factors (toxins, enzymes, alginate)	1281	rhlB	47.1	11	0.39
211	PA3479	NP_252169	A0A0H2ZE72;A0A8G2VWH9	N/A	Q51559	RHLA_PSEAE	K18100	N/A	rhamnosyltransferase subunit A [Pseudomonas aeruginosa PAO1]	295	Secreted factors (toxins, enzymes, alginate)	888	rhlA	33	20	1.15
212	PA3545	NP_252235	A0A485FSI1	N/A	Q51371	ALGG_PSEAE	K01795	Fructose and mannose metabolism;Metabolic pathways	alginate-c5-mannuronan-epimerase AlgG [Pseudomonas aeruginosa PAO1]	543	Adaptation protection,Alginate biosynthesis,Cell wall LPS capsule,Secreted factors (toxins, enzymes, alginate)	1632	algG	59.8	1	0.02
213	PA3561	NP_252251	A0A8G2RP77	N/A	Q9HY56	Q9HY56_PSEAE	K00882	Fructose and mannose metabolism;Metabolic pathways	1-phosphofructokinase [Pseudomonas aeruginosa PAO1]	314	Central intermediary metabolism,Fructose and mannose metabolism,Galactose metabolism,Transport of small molecules	945	fruK	33.4	2	0.1
214	PA3569	NP_252259	A0A8G3XSV1	N/A	P28811	MMSB_PSEAE	K00020	Valine, leucine and isoleucine degradation;Metabolic pathways	3-hydroxyisobutyrate dehydrogenase [Pseudomonas aeruginosa PAO1]	298	Carbon compound catabolism,Valine, leucine and isoleucine degradation	897	mmsB	30.5	1	0.06
215	PA3570	NP_252260	A0A8G2PCI7;A0A8G5P5Y2	N/A	P28810	MMSA_PSEAE	K00140	Valine, leucine and isoleucine degradation;beta-Alanine metabolism;Inositol phosphate metabolism;Propanoate metabolism;Metabolic pathways;Carbon metabolism	methylmalonate-semialdehyde dehydrogenase [Pseudomonas aeruginosa PAO1]	497	Amino acid biosynthesis and metabolism,Carbon compound catabolism,Propanoate metabolism,Valine, leucine and isoleucine degradation	1494	mmsA	53.7	16	0.55
216	PA3630	NP_252320	A0A8G6ARB8	N/A	Q9HY00	Q9HY00_PSEAE	N/A	N/A	glutathione-dependent formaldehyde neutralization regulator GfnR [Pseudomonas aeruginosa PAO1]	302	Transcriptional regulators	909	gfnR	34.1	1	0.05
217	PA3652	NP_252342	A0A485EIM5	N/A	Q9HXY2	UPPS_PSEAE	K00806	Terpenoid backbone biosynthesis;Biosynthesis of secondary metabolites	ditrans,polycis-undecaprenyl-diphosphate synthase [Pseudomonas aeruginosa PAO1]	251	Biosynthesis of cofactors, prosthetic groups and carriers,Cell wall LPS capsule	756	uppS	28	1	0.14
218	PA3653	NP_252343	A0A072ZRB7	N/A	O82853	RRF_PSEAE	K02838	N/A	ribosome recycling factor [Pseudomonas aeruginosa PAO1]	185	Translation post translation modification degradation	558	frr	20.5	4	0.32
219	PA3671	NP_252361	A0A080VFJ0	N/A	Q9HXW9	Q9HXW9_PSEAE	K25151	N/A	ABC transporter permease [Pseudomonas aeruginosa PAO1]	244	Membrane proteins,Transport of small molecules	735	0	26.8	1	0.06
220	PA3693	NP_252383	A0A8F9PQE1	N/A	Q9HXU7	Y3693_PSEAE	K23518	N/A	hypothetical protein PA3693 [Pseudomonas aeruginosa PAO1]	173	Hypothetical unclassified unknown	522	0	18.2	1	0.15
221	PA3702	NP_252391	A0A8G7DFG7	N/A	Q9HXT9	Q9HXT9_PSEAE	K11444	Two-component system	two-component response regulator [Pseudomonas aeruginosa PAO1]	347	Chemosensory,Chemotaxis,Chemotaxis,Motility,Nucleotide biosynthesis and metabolism,Two-component System	1044	wspR	37.9	4	0.22
222	PA3707	NP_252396	A0A080VCX3	N/A	Q9HXT4	Q9HXT4_PSEAE	K13488	Two-component system	hypothetical protein PA3707 [Pseudomonas aeruginosa PAO1]	171	Chemosensory,Chemotactic transducer (MCP),Chemotaxis,Motility	516	wspB	19.2	1	0.13
223	PA3710	NP_252399	A0A0H2ZEQ9	N/A	Q9HXT1	Q9HXT1_PSEAE	N/A	N/A	GMC-type oxidoreductase [Pseudomonas aeruginosa PAO1]	557	Carbon compound catabolism	1674	0	60.5	2	0.05
224	PA3712	NP_252401	A0A8G6SR53	N/A	Q9HXS9	Q9HXS9_PSEAE	N/A	N/A	hypothetical protein PA3712 [Pseudomonas aeruginosa PAO1]	231	Hypothetical unclassified unknown	696	0	24.7	3	0.23
225	PA3721	NP_252410	A0A8G7KMX1	N/A	Q9HXS0	Q9HXS0_PSEAE	K18130	beta-Lactam resistance	transcriptional regulator [Pseudomonas aeruginosa PAO1]	213	Antibiotic resistance and susceptibility,Transcriptional regulators	642	nalC	23.5	1	0.08
226	PA3723	NP_252412	A0A069Q5S5	N/A	Q9HXR8	Q9HXR8_PSEAE	N/A	N/A	FMN oxidoreductase [Pseudomonas aeruginosa PAO1]	368	Putative enzymes	1107	0	40.3	4	0.16
227	PA3740	NP_252429	A0A8G6W6T6	N/A	Q9HXQ4	Q9HXQ4_PSEAE	N/A	N/A	hypothetical protein PA3740 [Pseudomonas aeruginosa PAO1]	228	Hypothetical unclassified unknown	687	0	24.8	2	0.15
228	PA3751	NP_252440	A0A8G6GTI0	N/A	Q9HXP3	PURT_PSEAE	K08289	Purine metabolism;Metabolic pathways;Biosynthesis of secondary metabolites	phosphoribosylglycinamide formyltransferase [Pseudomonas aeruginosa PAO1]	393	Amino acid biosynthesis and metabolism,Glycine, serine and threonine metabolism,Nucleotide biosynthesis and metabolism,One carbon pool by folate,Purine metabolism	1182	purT	42.3	1	0.03
229	PA3760	NP_252449	A0A8D9JE81	N/A	Q9HXN5	Q9HXN5_PSEAE	K23993	N/A	N-acetyl-D-glucosamine phosphotransferase system transporter [Pseudomonas aeruginosa PAO1]	842	Transport of small molecules	2529	0	89.2	1	0.02
230	PA3795	NP_252484	A0A2R3IWH6	N/A	Q9HXK2	Q9HXK2_PSEAE	N/A	N/A	oxidoreductase [Pseudomonas aeruginosa PAO1]	316	Putative enzymes	951	0	34.8	1	0.07
231	PA3825	NP_252514	A0A8G2WMA8	N/A	Q9HXH7	Q9HXH7_PSEAE	K26148	N/A	hypothetical protein PA3825 [Pseudomonas aeruginosa PAO1]	526	Nucleotide biosynthesis and metabolism	1581	0	58.3	2	0.09
232	PA3847	NP_252536	A0A6A9KB09	N/A	Q9HXF9	Q9HXF9_PSEAE	N/A	N/A	hypothetical protein PA3847 [Pseudomonas aeruginosa PAO1]	156	Hypothetical unclassified unknown	471	0	18.3	1	0.06
233	PA3856	NP_252545	A0A8G6FJS9	N/A	Q9HXF0	Q9HXF0_PSEAE	N/A	N/A	hypothetical protein PA3856 [Pseudomonas aeruginosa PAO1]	160	Hypothetical unclassified unknown	483	0	18.3	1	0.16
234	PA3866	NP_252555	A0A8I0ZLJ1	N/A	Q9HXE0	Q9HXE0_PSEAE	N/A	N/A	pyocin protein [Pseudomonas aeruginosa PAO1]	764	Adaptation protection,Secreted factors (toxins, enzymes, alginate)	2295	0	80.7	1	0.02
235	PA3870	NP_252559	A0A8G7N7N4	N/A	Q9HXD6	MOAA1_PSEAE	K03639	Folate biosynthesis;Metabolic pathways;Biosynthesis of cofactors	molybdenum cofactor biosynthesis protein A [Pseudomonas aeruginosa PAO1]	329	Biosynthesis of cofactors, prosthetic groups and carriers,Molybdopterin biosynthesis	990	moaA1	36.6	1	0.02
236	PA3911	NP_252600	A0A069Q2S6	N/A	Q9HXA2	Q9HXA2_PSEAE	K24843	N/A	hypothetical protein PA3911 [Pseudomonas aeruginosa PAO1]	171	Hypothetical unclassified unknown	516	0	19.2	2	0.17
237	PA3922	NP_252611	A0A8G6HFE5	N/A	Q9HX91	Y3922_PSEAE	N/A	N/A	hypothetical protein PA3922 [Pseudomonas aeruginosa PAO1]	455	Hypothetical unclassified unknown	1368	0	51.2	3	0.12
238	PA3923	NP_252612	A0A0A8RAJ9	N/A	Q9HX90	Q9HX90_PSEAE	N/A	N/A	hypothetical protein PA3923 [Pseudomonas aeruginosa PAO1]	641	Hypothetical unclassified unknown	1926	0	69.6	1	0.04
239	PA3933	NP_252622	A0A0A8RAJ5	N/A	Q9HX83	Q9HX83_PSEAE	K02168	N/A	choline transporter [Pseudomonas aeruginosa PAO1]	653	Membrane proteins,Transport of small molecules	1962	betT3	72.2	1	0.02
240	PA3937	NP_252626	A0A8H2EPG1	N/A	Q9HX79	TAUB_PSEAE	K10831	Sulfur metabolism	taurine ABC transporter ATP-binding protein [Pseudomonas aeruginosa PAO1]	263	Transport of small molecules	792	0	28.8	1	Could Not Be Accurately Determined
241	PA3944	NP_252633	A0A071L0X2	N/A	Q9HX72	Q9HX72_PSEAE	N/A	N/A	hypothetical protein PA3944 [Pseudomonas aeruginosa PAO1]	192	Hypothetical unclassified unknown	579	0	21.9	1	0.07
242	PA3980	NP_252669	A0A072ZFA3	2.8.4.3	Q51470	MIAB_PSEAE	K06168	N/A	(dimethylallyl)adenosine tRNA methylthiotransferase [Pseudomonas aeruginosa PAO1]	446	Hypothetical unclassified unknown	1341	0	50	3	0.06
243	PA3986	NP_252675	A0A8G3JY27	N/A	Q9HX34	Q9HX34_PSEAE	N/A	N/A	hypothetical protein PA3986 [Pseudomonas aeruginosa PAO1]	143	Hypothetical unclassified unknown	432	0	15.9	1	0.08
244	PA4010	NP_252699	V6AA22	3.2.2.-	Q9HX17	3MGH_PSEAE	K03652	N/A	3-methyladenine DNA glycosylase [Pseudomonas aeruginosa PAO1]	239	Hypothetical unclassified unknown	720	0	26.9	1	0.08
245	PA4015	NP_252704	A0A8G2RNT9	N/A	Q9HX12	Q9HX12_PSEAE	N/A	N/A	hypothetical protein PA4015 [Pseudomonas aeruginosa PAO1]	151	Hypothetical unclassified unknown	456	0	16.7	1	Could Not Be Accurately Determined
246	PA4022	NP_252711	A0A8B5A7T7;A0A8G2TKN6;A0A8G6ZJI7	N/A	Q9HX05	Q9HX05_PSEAE	K00138	Glycolysis / Gluconeogenesis;Pyruvate metabolism;Metabolic pathways;Biosynthesis of secondary metabolites;Microbial metabolism in diverse environments	aldehyde dehydrogenase [Pseudomonas aeruginosa PAO1]	506	Putative enzymes	1521	hdhA	55	23	1
247	PA4078	NP_252767	A0A8G3ZXP8	N/A	Q9HWV0	Q9HWV0_PSEAE	N/A	N/A	nonribosomal peptide synthetase [Pseudomonas aeruginosa PAO1]	991	Adaptation protection	2976	0	110.4	2	0.03
248	PA4100	NP_252789	A0A8G2RR05	N/A	Q9HWS8	Q9HWS8_PSEAE	N/A	N/A	dehydrogenase [Pseudomonas aeruginosa PAO1]	559	Central intermediary metabolism	1680	0	60.4	1	0.02
249	PA4112	NP_252801	A0A8G2ZR91	N/A	Q9HWR8	Q9HWR8_PSEAE	N/A	N/A	sensor/response regulator hybrid protein [Pseudomonas aeruginosa PAO1]	1417	Two component regulatory systems,Two-component System	4254	0	153.9	1	0.01
250	PA4129	NP_252818	A0A069Q5I6	N/A	Q9HWQ2	Q9HWQ2_PSEAE	N/A	N/A	hypothetical protein PA4129 [Pseudomonas aeruginosa PAO1]	162	Adaptation protection	489	0	18.1	2	0.1
251	PA4130	NP_252819	A0A5K1SKA5	N/A	Q9HWQ1	Q9HWQ1_PSEAE	K00381	Sulfur metabolism;Metabolic pathways;Microbial metabolism in diverse environments	sulfite/nitrite reductase [Pseudomonas aeruginosa PAO1]	557	Adaptation protection,Central intermediary metabolism	1674	nirA	62.2	1	0.02
252	PA4131	NP_252820	A0A8G2VPT5;A0A8G6YRF9	N/A	Q9HWQ0	Q9HWQ0_PSEAE	N/A	N/A	iron-sulfur protein [Pseudomonas aeruginosa PAO1]	573	Adaptation protection,Putative enzymes	1722	0	64	16	0.45
253	PA4132	NP_252821	A0A8G8FKV3	N/A	Q9HWP9	Q9HWP9_PSEAE	N/A	N/A	hypothetical protein PA4132 [Pseudomonas aeruginosa PAO1]	471	Adaptation protection,Transcriptional regulators	1416	mpaR	52.3	1	0.04
254	PA4133	NP_252822	A0A071LDU2	7.1.1.9	Q9HWP8	Q9HWP8_PSEAE	K00404	Oxidative phosphorylation;Metabolic pathways;Two-component system	cbb3-type cytochrome C oxidase subunit I [Pseudomonas aeruginosa PAO1]	475	Adaptation protection,Energy metabolism	1428	0	53.3	1	0.05
255	PA4196	NP_252885	A0A8G2S5C6	N/A	Q9HWI5	Q9HWI5_PSEAE	N/A	N/A	protein BfiR [Pseudomonas aeruginosa PAO1]	214	Transcriptional regulators,Two component regulatory systems,Two-component System	645	bfiR	23.9	1	0.09
256	PA4219	NP_252909	A0A8B4ZUD1	N/A	P42514	Y4219_PSEAE	N/A	N/A	hypothetical protein PA4219 [Pseudomonas aeruginosa PAO1]	501	Antibiotic resistance and susceptibility,Membrane proteins	1185	ampO	42.2	6	0.21
257	PA4220	NP_252910	A0A367H530	N/A	P42513	FPTB_PSEAE	N/A	N/A	hypothetical protein PA4220 [Pseudomonas aeruginosa PAO1]	93	Hypothetical unclassified unknown	282	0	9.6	2	0.31
258	PA4224	NP_252914	A0A0C7CT39;A0A643IV74;A0A6B1YNI1	N/A	Q9HWG5	Q9HWG5_PSEAE	K12241	N/A	pyochelin biosynthetic protein PchG [Pseudomonas aeruginosa PAO1]	349	Membrane proteins,Transport of small molecules	1050	pchG	37.7	23	1.02
259	PA4226	NP_252916	A0A485FQZ5;A0A8G4N1C5;A0A8G6YLL6	N/A	G3XCV2	G3XCV2_PSEAE	K12239	N/A	dihydroaeruginoic acid synthetase [Pseudomonas aeruginosa PAO1]	1438	Pyochelin synthesis,Secreted factors (toxins, enzymes, alginate),Transport of small molecules	4317	pchE	156.4	81	1.02
260	PA4228	NP_252918	A0A8F9V6M0	N/A	Q9HWG3	Q9HWG3_PSEAE	K12238	N/A	2,3-dihydroxybenzoate-AMP ligase [Pseudomonas aeruginosa PAO1]	547	Pyochelin synthesis,Secreted factors (toxins, enzymes, alginate),Transport of small molecules	1644	pchD	59.9	21	0.82
261	PA4229	NP_252919	P72176	N/A	Q9HWG2	Q9HWG2_PSEAE	K12242	N/A	pyochelin biosynthetic protein PchC [Pseudomonas aeruginosa PAO1]	251	Pyochelin synthesis,Secreted factors (toxins, enzymes, alginate),Transport of small molecules	756	pchC	27.6	1	0.06
262	PA4230	NP_252920	A0A8F9Y661	N/A	Q51507	PCHB_PSEAE	K04782	Biosynthesis of secondary metabolites	isochorismate-pyruvate lyase [Pseudomonas aeruginosa PAO1]	101	Pyochelin synthesis,Secreted factors (toxins, enzymes, alginate),Transport of small molecules	306	pchB	11.4	3	0.35
263	PA4231	NP_252921	A0A0A8RA23	5.4.4.2	Q51508	PCHA_PSEAE	K01851	Ubiquinone and other terpenoid-quinone biosynthesis;Metabolic pathways;Biosynthesis of secondary metabolites	salicylate biosynthesis isochorismate synthase [Pseudomonas aeruginosa PAO1]	476	Pyochelin synthesis,Secreted factors (toxins, enzymes, alginate),Transport of small molecules,Ubiquinone biosynthesis	1431	pchA	52.1	8	0.33
264	PA4282	NP_252972	A0A8G2RLR8	N/A	Q9HWB8	SBCC_PSEAE	K03546	N/A	exonuclease [Pseudomonas aeruginosa PAO1]	1211	DNA replication recombination modification and repair	3636	0	139	1	0
265	PA4312	NP_253002	A0A077JMD2;A0A2R3IQ24	N/A	Q9HW89	Q9HW89_PSEAE	K06986	N/A	hypothetical protein PA4312 [Pseudomonas aeruginosa PAO1]	253	Hypothetical unclassified unknown	762	0	29.5	2	0.09
266	PA4329	NP_253019	A0A069PYA5	2.7.1.40	Q9HW72	Q9HW72_PSEAE	K00873	Glycolysis / Gluconeogenesis;Pyruvate metabolism;Metabolic pathways;Biosynthesis of secondary metabolites;Microbial metabolism in diverse environments;Carbon metabolism;Biosynthesis of amino acids	pyruvate kinase [Pseudomonas aeruginosa PAO1]	483	Carbon compound catabolism,Carbon fixation,Energy metabolism,Glycolysis / Gluconeogenesis,Purine metabolism,Pyruvate metabolism	1452	pykA	52.3	1	0.04
267	PA4336	NP_253026	A0A8G6VPJ4	N/A	Q9HW65	Q9HW65_PSEAE	K05520	N/A	hypothetical protein PA4336 [Pseudomonas aeruginosa PAO1]	194	Hypothetical unclassified unknown	585	0	21	1	0.15
268	PA4341	NP_253031	A0A2R3IP26	N/A	Q9HW60	Q9HW60_PSEAE	N/A	N/A	transcriptional regulator [Pseudomonas aeruginosa PAO1]	256	Transcriptional regulators	771	0	29.1	1	0.04
269	PA4353	NP_253043	A0A8G7INJ4	N/A	Q9HW48	Q9HW48_PSEAE	K08682	Pantothenate and CoA biosynthesis;Metabolic pathways	hypothetical protein PA4353 [Pseudomonas aeruginosa PAO1]	190	Hypothetical unclassified unknown	573	0	22	2	0.14
270	PA4362	NP_253052	A0A6B1Y6J0	N/A	Q9HW39	Q9HW39_PSEAE	N/A	N/A	hypothetical protein PA4362 [Pseudomonas aeruginosa PAO1]	352	Hypothetical unclassified unknown	1059	0	37.8	4	0.22
271	PA4395	NP_253085	A0A071L267	N/A	Q9HW11	Y4395_PSEAE	K09767	N/A	nucleotide-binding protein [Pseudomonas aeruginosa PAO1]	159	Hypothetical unclassified unknown	480	0	18	3	0.25
272	PA4447	NP_253137	A0A0A8RLV2	N/A	Q9HVX0	HIS81_PSEAE	K00817	Histidine metabolism;Tyrosine metabolism;Phenylalanine metabolism;Phenylalanine, tyrosine and tryptophan biosynthesis;Metabolic pathways;Biosynthesis of secondary metabolites;Biosynthesis of amino acids	histidinol-phosphate aminotransferase [Pseudomonas aeruginosa PAO1]	351	Amino acid biosynthesis and metabolism,Histidine metabolism,Phenylalanine metabolism,Phenylalanine, tyrosine and tryptophan biosynthesis,Tyrosine metabolism	1056	hisC1	38.7	1	0.06
273	PA4484	NP_253174	A0A8F8QZG3	N/A	Q9HVT7	GATB_PSEAE	K02434	Metabolic pathways	aspartyl/glutamyl-tRNA amidotransferase subunit B [Pseudomonas aeruginosa PAO1]	481	Translation post translation modification degradation	1446	gatB	53.1	1	0.04
274	PA4499	NP_253189	A0A2R3IZW0;A0A509JMV7	N/A	Q9HVS2	Q9HVS2_PSEAE	N/A	N/A	transcriptional regulator [Pseudomonas aeruginosa PAO1]	187	Transcriptional regulators	564	psdR	20.4	2	Could Not Be Accurately Determined
275	PA4516	NP_253206	A0A1X0SS78	N/A	Q9HVQ6	Q9HVQ6_PSEAE	K07126	N/A	hypothetical protein PA4516 [Pseudomonas aeruginosa PAO1]	271	Hypothetical unclassified unknown	816	0	29.6	1	0.04
276	PA4523	NP_253213	A0A8G7Q1N6	N/A	Q9HVQ1	Q9HVQ1_PSEAE	N/A	N/A	hypothetical protein PA4523 [Pseudomonas aeruginosa PAO1]	751	Hypothetical unclassified unknown	2256	0	83.6	1	0.01
277	PA4547	NP_253237	A0A8G2NW74	N/A	Q00934	PILR_PSEAE	K02667	Two-component system	two-component response regulator PilR [Pseudomonas aeruginosa PAO1]	445	Pilin biosynthesis,Transcriptional regulators,Two component regulatory systems,Two-component System	1338	pilR	49.7	5	0.17
278	PA4580	NP_253270	A0A8G2UWZ9	N/A	Q9HVK4	Q9HVK4_PSEAE	N/A	N/A	hypothetical protein PA4580 [Pseudomonas aeruginosa PAO1]	184	Hypothetical unclassified unknown	555	0	20.5	1	0.05
279	PA4585	NP_253275	A0A8G7FNI9	N/A	Q9HVJ9	RTCA_PSEAE	K01974	N/A	RNA 3'-terminal-phosphate cyclase [Pseudomonas aeruginosa PAO1]	341	Transcription RNA processing and degradation	1026	rtcA	36.6	1	0.04
280	PA4587	NP_253277	A0A2R3ILZ4	N/A	P14532	CCPR_PSEAE	K00428	N/A	cytochrome C551 peroxidase [Pseudomonas aeruginosa PAO1]	346	Energy metabolism	1041	ccpR	37.4	3	0.17
281	PA4624	NP_253314	A0A8G2S0S9	N/A	Q9HVG7	Q9HVG7_PSEAE	N/A	N/A	hypothetical protein PA4624 [Pseudomonas aeruginosa PAO1]	568	Cell wall LPS capsule,Two-partner secretion system	1707	cdrB	63.3	1	0.03
282	PA4657	NP_253346	A0A3M5D789	1.6.3.5	Q9HVD5	Q9HVD5_PSEAE	K18208	N/A	hypothetical protein PA4657 [Pseudomonas aeruginosa PAO1]	327	Hypothetical unclassified unknown	984	0	35.9	1	0.06
283	PA4677	NP_253366	A0A8H1AC88	N/A	Q9HVB8	Q9HVB8_PSEAE	N/A	N/A	hypothetical protein PA4677 [Pseudomonas aeruginosa PAO1]	412	Hypothetical unclassified unknown	1239	0	46.9	2	0.12
284	PA4715	NP_253403	A0A8G2NXV2	N/A	Q9HV83	Q9HV83_PSEAE	K14261	N/A	aminotransferase [Pseudomonas aeruginosa PAO1]	411	Putative enzymes	1236	0	46.1	1	0.04
285	PA4722	NP_253410	A0A0H2ZHV0	2.6.1.-	Q9HV76	Q9HV76_PSEAE	N/A	N/A	hypothetical protein PA4722 [Pseudomonas aeruginosa PAO1]	390	Putative enzymes	1173	0	42.6	1	0.03
286	PA4728	NP_253416	A0A659BMZ9	N/A	Q9HV71	HPPK_PSEAE	K00950	Folate biosynthesis;Metabolic pathways;Biosynthesis of cofactors	2-amino-4-hydroxy-6-hydroxymethyldihydropteridine pyrophosphokinase [Pseudomonas aeruginosa PAO1]	162	Biosynthesis of cofactors, prosthetic groups and carriers,Folate biosynthesis	489	folK	18	1	0.12
287	PA4764	NP_253452	A0A0H2ZHX0	N/A	Q03456	FUR_PSEAE	K03711	N/A	ferric uptake regulation protein [Pseudomonas aeruginosa PAO1]	134	Transcriptional regulators	405	fur	15.2	2	0.22
288	PA4782	NP_253470	A0A5E9W715	N/A	Q9HV26	Q9HV26_PSEAE	N/A	N/A	hypothetical protein PA4782 [Pseudomonas aeruginosa PAO1]	81	Hypothetical unclassified unknown	246	0	8.7	1	0.21
289	PA4790	NP_253478	A0A8G7L1E6	N/A	Q9HV18	Q9HV18_PSEAE	K06219	N/A	hypothetical protein PA4790 [Pseudomonas aeruginosa PAO1]	249	Hypothetical unclassified unknown	750	0	28.3	1	0.08
290	PA4791	NP_253479	A0A069Q2H9	N/A	Q9HV17	Q9HV17_PSEAE	N/A	N/A	hypothetical protein PA4791 [Pseudomonas aeruginosa PAO1]	206	Hypothetical unclassified unknown	621	0	22.3	1	0.11
291	PA4825	NP_253512	A0A8F9KIR8	N/A	Q9HUY5	Q9HUY5_PSEAE	K01531	N/A	Mg(2+) transport ATPase [Pseudomonas aeruginosa PAO1]	903	Transport of small molecules	2712	mgtA	100.1	4	0.06
292	PA4841	NP_253528	A0A8G6UFL6	N/A	Q9HUW9	Y4841_PSEAE	N/A	N/A	hypothetical protein PA4841 [Pseudomonas aeruginosa PAO1]	178	Hypothetical unclassified unknown	537	0	19.7	2	0.2
293	PA4854	NP_253541	A0A069Q1H2	N/A	Q9HUV9	PUR9_PSEAE	K00602	Purine metabolism;One carbon pool by folate;Metabolic pathways;Biosynthesis of secondary metabolites	bifunctional phosphoribosylaminoimidazolecarboxamide formyltransferase/IMP cyclohydrolase [Pseudomonas aeruginosa PAO1]	535	Nucleotide biosynthesis and metabolism	1608	purH	57.7	2	0.05
294	PA4866	NP_253553	A0A8G4MBY5	N/A	Q9HUU7	Q9HUU7_PSEAE	K24217	N/A	hypothetical protein PA4866 [Pseudomonas aeruginosa PAO1]	172	Hypothetical unclassified unknown	519	0	18.7	2	0.16
295	PA4890	NP_253577	A0A6A9JZ96	N/A	Q9HUS3	Q9HUS3_PSEAE	K22105	N/A	transcriptional regulator [Pseudomonas aeruginosa PAO1]	209	Transcriptional regulators	630	desT	22.9	1	0.04
296	PA4922	NP_253609	B3EWN9	N/A	P00282	AZUR_PSEAE	N/A	N/A	azurin [Pseudomonas aeruginosa PAO1]	148	Energy metabolism	447	azu	16	2	0.29
297	PA4950	NP_253637	A0A0A8RIV1	1.17.99.6	Q9HUL4	QUEG_PSEAE	K18979	N/A	hypothetical protein PA4950 [Pseudomonas aeruginosa PAO1]	361	Hypothetical unclassified unknown	1086	0	40.5	1	0.02
298	PA4951	NP_253638	A0A8H1AG24	N/A	P57665	ORN_PSEAE	K13288	N/A	oligoribonuclease [Pseudomonas aeruginosa PAO1]	180	Transcription RNA processing and degradation	543	orn	20.8	1	0.04
299	PA4956	NP_253643	A0A3M5D436	N/A	Q9HUK9	Q9HUK9_PSEAE	K01011	Cysteine and methionine metabolism;Sulfur metabolism;Metabolic pathways;Microbial metabolism in diverse environments	thiosulfate:cyanide sulfurtransferase [Pseudomonas aeruginosa PAO1]	271	Central intermediary metabolism	816	rhdA	29.4	1	0.06
300	PA4959	NP_253646	A0A8G3U2E2	N/A	Q9HUK6	Q9HUK6_PSEAE	K21025	N/A	protein FimX [Pseudomonas aeruginosa PAO1]	691	Motility	2076	fimX	76	3	0.06
301	PA4974	NP_253661	A0A8G2ZH80	N/A	Q9HUJ1	Q9HUJ1_PSEAE	K12340	beta-Lactam resistance;Cationic antimicrobial peptide (CAMP) resistance;Two-component system;Pertussis	hypothetical protein PA4974 [Pseudomonas aeruginosa PAO1]	482	Protein secretion export apparatus	1449	0	53.4	1	0.02
302	PA5038	NP_253725	A0A8G3UWC5	N/A	P34002	AROB_PSEAE	K01735	Phenylalanine, tyrosine and tryptophan biosynthesis;Metabolic pathways;Biosynthesis of secondary metabolites;Biosynthesis of amino acids	3-dehydroquinate synthase [Pseudomonas aeruginosa PAO1]	368	Amino acid biosynthesis and metabolism,Phenylalanine, tyrosine and tryptophan biosynthesis	1107	aroB	40.1	2	0.11
303	PA5058	NP_253745	A0A8G6FAK6	N/A	G3XCZ9	G3XCZ9_PSEAE	K03821	Butanoate metabolism;Metabolic pathways	poly(3-hydroxyalkanoic acid) synthase [Pseudomonas aeruginosa PAO1]	560	Central intermediary metabolism	1683	phaC2	62.7	1	0.03
304	PA5091	NP_253778	A0A8G6IBW0	N/A	Q9HU92	Q9HU92_PSEAE	K01458	Histidine metabolism;Glyoxylate and dicarboxylate metabolism;Metabolic pathways	N-formylglutamate amidohydrolase [Pseudomonas aeruginosa PAO1]	266	Amino acid biosynthesis and metabolism	801	hutG	29.8	1	0.04
305	PA5095	NP_253782	A0A6M3UWI8	N/A	Q9HU88	Q9HU88_PSEAE	K02001	N/A	ABC transporter permease [Pseudomonas aeruginosa PAO1]	283	Membrane proteins,Transport of small molecules	852	0	30.9	1	0.06
306	PA5100	NP_253787	A0A8G7DFW9	N/A	Q9HU83	HUTU_PSEAE	K01712	Histidine metabolism;Metabolic pathways	urocanate hydratase [Pseudomonas aeruginosa PAO1]	559	Amino acid biosynthesis and metabolism	1680	hutU	61.2	4	0.14
307	PA5115	NP_253802	A0A072ZJC9	N/A	Q9HU69	Q9HU69_PSEAE	N/A	N/A	hypothetical protein PA5115 [Pseudomonas aeruginosa PAO1]	194	Hypothetical unclassified unknown	585	0	21	1	0.08
308	PA5137	NP_253824	A0A8G7K8Z2	N/A	Q9HU47	Q9HU47_PSEAE	K02030	N/A	hypothetical protein PA5137 [Pseudomonas aeruginosa PAO1]	251	Hypothetical unclassified unknown	756	0	28	1	0.08
309	PA5141	NP_253828	A0A8G3WCF0	N/A	Q9HU43	HIS4_PSEAE	K01814	Histidine metabolism;Metabolic pathways;Biosynthesis of secondary metabolites;Biosynthesis of amino acids	1-(5-phosphoribosyl)-5-[(5-phosphoribosylamino)methylideneamino] imidazole-4-carboxamide isomerase [Pseudomonas aeruginosa PAO1]	245	Amino acid biosynthesis and metabolism,Histidine metabolism	738	hisA	25.9	2	0.1
310	PA5164	NP_253851	A0A071KZQ8	5.1.3.13	Q9HU21	RMLC_PSEAE	K01790	Streptomycin biosynthesis;Polyketide sugar unit biosynthesis;O-Antigen nucleotide sugar biosynthesis;Metabolic pathways;Biosynthesis of secondary metabolites;Biosynthesis of nucleotide sugars	dTDP-4-dehydrorhamnose 3,5-epimerase [Pseudomonas aeruginosa PAO1]	181	Cell wall LPS capsule	546	rmlC	20.8	1	0.07
311	PA5167	NP_253854	A0A2R3J3S7	N/A	Q9HU18	Q9HU18_PSEAE	K11688	Two-component system	C4-dicarboxylate-binding protein [Pseudomonas aeruginosa PAO1]	331	C(4)-dicarboxylate transport,C(4)-dicarboxylate transport,Membrane proteins,Transport of small molecules	996	dctP	37.1	1	0.04
312	PA5174	NP_253861	A0A8G4BKX8	N/A	Q9HU15	Q9HU15_PSEAE	K18473	Fatty acid biosynthesis;Metabolic pathways;Fatty acid metabolism	beta-ketoacyl synthase [Pseudomonas aeruginosa PAO1]	634	Fatty acid and phospholipid metabolism	1905	fabY	68.8	1	0.03
313	PA5198	NP_253885	A0A2R3IT24	N/A	Q9HTZ1	LDC_PSEAE	K01297	N/A	LD-carboxypeptidase [Pseudomonas aeruginosa PAO1]	307	Hypothetical unclassified unknown	924	0	33.3	2	0.09
314	PA5204	NP_253891	A0A8G7A9W5	N/A	P22567	ARGA_PSEAE	K14682	Arginine biosynthesis;Metabolic pathways;Biosynthesis of secondary metabolites;2-Oxocarboxylic acid metabolism;Biosynthesis of amino acids	N-acetylglutamate synthase [Pseudomonas aeruginosa PAO1]	432	Amino acid biosynthesis and metabolism,Arginine and proline metabolism,Urea cycle and metabolism of amino groups	1299	argA	47.9	2	0.1
315	PA5213	NP_253900	A0A8G2S0I0	N/A	Q9HTX7	GCSP2_PSEAE	K00281	Glycine, serine and threonine metabolism;Glyoxylate and dicarboxylate metabolism;Lipoic acid metabolism;Metabolic pathways;Biosynthesis of secondary metabolites;Carbon metabolism	glycine dehydrogenase [Pseudomonas aeruginosa PAO1]	958	Amino acid biosynthesis and metabolism,Central intermediary metabolism,Glycine, serine and threonine metabolism	2877	gcvP1	104.7	1	0.02
316	PA5224	NP_253911	A0A2R3IPJ8	N/A	Q9HTW6	Q9HTW6_PSEAE	K01262	N/A	aminopeptidase [Pseudomonas aeruginosa PAO1]	444	Translation post translation modification degradation	1335	pepP	49.7	1	0.03
317	PA5245	NP_253932	A0A072ZIZ2	N/A	Q9HTU9	Q9HTU9_PSEAE	N/A	N/A	glutamine amidotransferase [Pseudomonas aeruginosa PAO1]	222	Hypothetical unclassified unknown	669	0	23.4	1	0.1
318	PA5260	NP_253947	A0A509JNA6	3.1.21.3	Q60169	HEM3_PSEAE	K01749	Porphyrin metabolism;Metabolic pathways;Biosynthesis of secondary metabolites;Microbial metabolism in diverse environments;Biosynthesis of cofactors	porphobilinogen deaminase [Pseudomonas aeruginosa PAO1]	313	Biosynthesis of cofactors, prosthetic groups and carriers,Porphyrin and chlorophyll metabolism	942	hemC	33.6	1	Could Not Be Accurately Determined
319	PA5272	NP_253959	A0A6A9KES9	N/A	Q9HTS8	Q9HTS8_PSEAE	K05851	Purine metabolism;Metabolic pathways;Biofilm formation - Vibrio cholerae	adenylate cyclase [Pseudomonas aeruginosa PAO1]	950	Adaptation protection	2853	cyaA	108.7	1	0.01
320	PA5281	NP_253968	A0A080VJ85	N/A	Q9HTS3	Q9HTS3_PSEAE	K20862	Riboflavin metabolism;Metabolic pathways;Biosynthesis of secondary metabolites;Biosynthesis of cofactors	hydrolase [Pseudomonas aeruginosa PAO1]	232	Putative enzymes	699	0	25.9	1	0.06
321	PA5299	NP_253986	A0A8G2S1J5	N/A	Q9HTQ5	Q9HTQ5_PSEAE	N/A	N/A	hypothetical protein PA5299 [Pseudomonas aeruginosa PAO1]	619	Hypothetical unclassified unknown	1860	0	68.7	2	0.04
322	PA5302	NP_253989	A0A232BI16	5.1.1.1	Q9HTQ2	ALR2_PSEAE	K01775	D-Amino acid metabolism;Metabolic pathways;Vancomycin resistance	alanine racemase [Pseudomonas aeruginosa PAO1]	357	Alanine and Aspartate metabolism,Amino acid biosynthesis and metabolism,D-Alanine metabolism	1074	dadX	38.9	1	0.04
323	PA5317	NP_254004	A0A080VW31	N/A	Q9HTN7	Q9HTN7_PSEAE	K12368	N/A	dipeptide ABC transporter substrate-binding protein [Pseudomonas aeruginosa PAO1]	526	Transport of small molecules	1581	dppA5	57.9	2	0.04
324	PA5331	NP_254018	A0A072ZIP6	2.4.2.10	P50587	PYRE_PSEAE	K00762	Pyrimidine metabolism;Metabolic pathways;Biosynthesis of cofactors	orotate phosphoribosyltransferase [Pseudomonas aeruginosa PAO1]	213	Nucleotide biosynthesis and metabolism,Pyrimidine metabolism	642	pyrE	23.3	1	0.09
325	PA5343	NP_254030	A0A069Q2V0	N/A	Q9HTL5	Q9HTL5_PSEAE	N/A	N/A	hypothetical protein PA5343 [Pseudomonas aeruginosa PAO1]	283	Hypothetical unclassified unknown	852	0	30.8	1	0.06
326	PA5345	NP_254032	A0A367MFQ4	3.6.4.12	Q9HTL3	Q9HTL3_PSEAE	K03655	N/A	ATP-dependent DNA helicase RecG [Pseudomonas aeruginosa PAO1]	691	DNA replication recombination modification and repair,Transcriptional regulators	2076	recG	76.2	2	0.04
327	PA5346	NP_254033	A0A080VW39	N/A	Q9HTL2	Q9HTL2_PSEAE	N/A	N/A	hypothetical protein PA5346 [Pseudomonas aeruginosa PAO1]	469	Cell wall LPS capsule	1410	sadB	51.4	1	0.04
328	PA5347	NP_254034	A0A069Q213	N/A	Q9HTL1	Q9HTL1_PSEAE	N/A	N/A	hypothetical protein PA5347 [Pseudomonas aeruginosa PAO1]	130	Hypothetical unclassified unknown	393	0	14.7	1	0.1
329	PA5354	NP_254041	A0A1C7BBE2	N/A	Q9HTK4	Q9HTK4_PSEAE	K11472	Glyoxylate and dicarboxylate metabolism;Metabolic pathways;Biosynthesis of secondary metabolites;Microbial metabolism in diverse environments	glycolate oxidase FAD binding subunit [Pseudomonas aeruginosa PAO1]	359	Carbon compound catabolism,Central intermediary metabolism,Glyoxylate and dicarboxylate metabolism	1080	glcE	38.2	1	0.04
330	PA5355	NP_254042	A0A081HH16	N/A	Q9HTK3	Q9HTK3_PSEAE	K00104	Glyoxylate and dicarboxylate metabolism;Metabolic pathways;Biosynthesis of secondary metabolites;Microbial metabolism in diverse environments	glycolate oxidase subunit GlcD [Pseudomonas aeruginosa PAO1]	499	Carbon compound catabolism,Central intermediary metabolism,Glyoxylate and dicarboxylate metabolism	1500	glcD	53.7	1	0.03
331	PA5378	NP_254065	A0A218MB10	N/A	Q9HTI6	Q9HTI6_PSEAE	K02002	N/A	hypothetical protein PA5378 [Pseudomonas aeruginosa PAO1]	312	Transport of small molecules	939	cbcX	34.4	1	Could Not Be Accurately Determined
332	PA5413	NP_254100	A0A071KYD4	4.1.2.48	Q9HTF1	LTAE_PSEAE	K01620	Glycine, serine and threonine metabolism;Metabolic pathways;Biosynthesis of secondary metabolites;Microbial metabolism in diverse environments;Biosynthesis of amino acids	low specificity l-threonine aldolase [Pseudomonas aeruginosa PAO1]	346	Amino acid biosynthesis and metabolism,Glycine, serine and threonine metabolism	1041	ltaA	38.2	1	0.05
333	PA5428	NP_254115	A0A0C6FE70	N/A	Q9HTD8	Q9HTD8_PSEAE	K21645	N/A	transcriptional regulator [Pseudomonas aeruginosa PAO1]	302	Transcriptional regulators	909	0	33.4	2	0.11
334	PA5474	NP_254161	A0A659C995	N/A	Q9HT96	Q9HT96_PSEAE	N/A	N/A	metalloprotease [Pseudomonas aeruginosa PAO1]	457	Translation post translation modification degradation	1374	0	51.4	2	0.07
335	PA5488	NP_254175	A0A069PX14	N/A	Q9HT83	Q9HT83_PSEAE	N/A	N/A	hypothetical protein PA5488 [Pseudomonas aeruginosa PAO1]	292	Hypothetical unclassified unknown	879	0	32.9	2	0.16
336	PA5511	NP_254198	A0A8G2RKM2	N/A	Q9HT62	Q9HT62_PSEAE	K10126	Two-component system	DNA-binding response regulator MifR [Pseudomonas aeruginosa PAO1]	447	Cell wall LPS capsule,Transcriptional regulators,Two component regulatory systems,Two-component System	1344	mifR	49.6	1	0.02
337	PA5521	NP_254208	A0A1C7BBU3	N/A	Q9HT52	Q9HT52_PSEAE	N/A	N/A	short-chain dehydrogenase [Pseudomonas aeruginosa PAO1]	252	Putative enzymes	759	0	26.9	3	0.26
338	PA3701	YP_003933612	A0A8G2QYV0	N/A	#N/A	#N/A	K02836	N/A	peptide chain release factor 1 [Pseudomonas aeruginosa PAO1]	364	#N/A	#N/A	#N/A	#N/A	1	0.07

## Sheet: AUM_log_sta
Protein ID	Locus_Tag	## Accession	Provided_UniProt_Accessions	Enzyme_Classification_Number	UniProtKB Accession	UniProtKB ID	KEGG_Ortholog	Pathways	Annotation	Sequence_Length	Function	Gene Length	Gene Name	Estimated MW (kDa)	CumulativePartialPeptideSequences		AverageSequenceCoverage
															AUM_log	AUM_sta	AUM_log	AUM_sta
1	PA0003	NP_064723	A0A071L3B9;A0A8G7FEQ7	N/A	Q9I7C3	RECF_PSEAE	K03629	N/A	DNA replication and repair protein RecF [Pseudomonas aeruginosa PAO1]	369	DNA replication recombination modification and repair	1110	recF	41.5	2	1	0.07	Could Not Be Accurately Determined
2	PA0044	NP_248734	A0A241XGY9	N/A	Q9I788	Q9I788_PSEAE	K16636	N/A	exoenzyme T [Pseudomonas aeruginosa PAO1]	457	Secreted factors (toxins, enzymes, alginate),Type III Secretion	1374	exoT	48.5	1	1	Could Not Be Accurately Determined	Could Not Be Accurately Determined
3	PA0123	NP_248813	A0A8G7A8F5	N/A	Q9I709	Q9I709_PSEAE	N/A	N/A	transcriptional regulator [Pseudomonas aeruginosa PAO1]	302	Transcriptional regulators	909	0	33.4	1	1	0.08	0.08
4	PA0489	NP_249180	A0A8G6WDC5	N/A	Q9I629	Q9I629_PSEAE	N/A	N/A	phosphoribosyl transferase [Pseudomonas aeruginosa PAO1]	241	Putative enzymes	726	0	27.1	1	2	0.03	0.07
5	PA0752	NP_249443	A0A0A8RIA4	N/A	Q9I5H7	Q9I5H7_PSEAE	K07793	Two-component system	hypothetical protein PA0752 [Pseudomonas aeruginosa PAO1]	505	Membrane proteins	1518	0	52.8	1	1	0.05	0.05
6	PA0753	NP_249444	A0A8G3P983	N/A	Q9I5H6	Q9I5H6_PSEAE	K07794	Two-component system	hypothetical protein PA0753 [Pseudomonas aeruginosa PAO1]	156	Membrane proteins	471	0	16.8	1	2	0.08	0.19
7	PA0754	NP_249445	A0A069Q4J1	N/A	Q9I5H5	Q9I5H5_PSEAE	K07795	Two-component system	hypothetical protein PA0754 [Pseudomonas aeruginosa PAO1]	327	Hypothetical unclassified unknown	984	0	34.9	3	3	0.13	0.21
8	PA0755	NP_249446	A0A0H2Z6S7;A0A2R3ITD6	N/A	Q9I5H4	Q9I5H4_PSEAE	N/A	N/A	cis-aconitate porin OpdH [Pseudomonas aeruginosa PAO1]	427	Membrane proteins,Transport of small molecules	1284	opdH	47	1	14	0.05	0.59
9	PA0773	NP_249464	A0A8G2NR93	N/A	Q9I5G5	PDXJ_PSEAE	K03474	Vitamin B6 metabolism;Metabolic pathways;Biosynthesis of cofactors	pyridoxine 5'-phosphate synthase [Pseudomonas aeruginosa PAO1]	248	Biosynthesis of cofactors, prosthetic groups and carriers	747	pdxJ	27.2	1	1	0.06	0.06
10	PA0781	NP_249472	A0A8G2QL37	N/A	Q9I5F7	Q9I5F7_PSEAE	K02014	N/A	hypothetical protein PA0781 [Pseudomonas aeruginosa PAO1]	687	Hypothetical unclassified unknown	2064	0	74.2	35	42	1.2	1.45
11	PA0801	NP_249492	A0A0A8RIF2	N/A	Q9I5D7	Q9I5D7_PSEAE	N/A	N/A	hypothetical protein PA0801 [Pseudomonas aeruginosa PAO1]	506	Membrane proteins	1521	0	56.1	1	1	0.03	0.03
12	PA1072	NP_249763	A0A072ZMR9	N/A	P21628	BRAE_PSEAE	K01998	N/A	branched-chain amino acid ABC transporter permease BraE [Pseudomonas aeruginosa PAO1]	417	Membrane proteins,Transport of small molecules	1254	braE	45.6	1	1	0.02	0.02
13	PA1115	NP_249806	A0A8G4D7H4	N/A	Q9I4M0	Q9I4M0_PSEAE	N/A	N/A	hypothetical protein PA1115 [Pseudomonas aeruginosa PAO1]	774	Membrane proteins	2325	0	85.8	1	2	0.02	0.05
14	PA1316	NP_250007	A0A8G2VWA3	N/A	Q9I428	Q9I428_PSEAE	K08166	N/A	major facilitator superfamily transporter [Pseudomonas aeruginosa PAO1]	513	Membrane proteins,Transport of small molecules	1542	0	53.1	1	1	0.02	0.02
15	PA1325	NP_250016	A0A0H2Z866	N/A	Q9I419	Q9I419_PSEAE	N/A	N/A	hypothetical protein PA1325 [Pseudomonas aeruginosa PAO1]	135	Hypothetical unclassified unknown	408	0	14.8	2	2	0.39	0.39
16	PA1326	NP_250017	A0A069Q0C9	4.3.1.19	Q9I418	Q9I418_PSEAE	K01754	Glycine, serine and threonine metabolism;Valine, leucine and isoleucine biosynthesis;Metabolic pathways;Biosynthesis of secondary metabolites;Carbon metabolism;Biosynthesis of amino acids	threonine dehydratase [Pseudomonas aeruginosa PAO1]	515	Amino acid biosynthesis and metabolism,Glycine, serine and threonine metabolism	1548	ilvA2	55.9	12	5	0.45	0.21
17	PA1513	NP_250204	A0A081HSN4	N/A	Q9I3K0	Q9I3K0_PSEAE	N/A	N/A	hypothetical protein PA1513 [Pseudomonas aeruginosa PAO1]	425	Membrane proteins	1278	0	46	3	6	0.16	0.27
18	PA1615	NP_250306	A0A8G3ZPV3	N/A	Q9I3A7	Q9I3A7_PSEAE	N/A	N/A	lipase [Pseudomonas aeruginosa PAO1]	113	Putative enzymes	342	0	12.5	1	1	0.18	0.18
19	PA1629	NP_250320	A0A8G3EAX2	N/A	Q9I393	Q9I393_PSEAE	K01692	Fatty acid degradation;Valine, leucine and isoleucine degradation;Lysine degradation;Phenylalanine metabolism;Benzoate degradation;Tryptophan metabolism;beta-Alanine metabolism;Aminobenzoate degradation;Propanoate metabolism;Butanoate metabolism;Metabolic pathways;Biosynthesis of secondary metabolites;Microbial metabolism in diverse environments;Fatty acid metabolism	enoyl-CoA hydratase [Pseudomonas aeruginosa PAO1]	261	Carbon compound catabolism	786	0	27.9	1	1	0.02	0.02
20	PA1782	NP_250473	A0A8G2RQR5	N/A	Q9I2W0	Q9I2W0_PSEAE	N/A	N/A	serine/threonine-protein kinase [Pseudomonas aeruginosa PAO1]	531	Adaptation protection	1596	0	58.9	1	1	Could Not Be Accurately Determined	Could Not Be Accurately Determined
21	PA1843	NP_250534	A0A8G2UC35;A0A8G3YEB9	N/A	Q9I2Q2	METH_PSEAE	K00548	Cysteine and methionine metabolism;One carbon pool by folate;Metabolic pathways;Biosynthesis of secondary metabolites;Biosynthesis of amino acids	B12-dependent methionine synthase [Pseudomonas aeruginosa PAO1]	1234	Amino acid biosynthesis and metabolism,Methionine metabolism,One carbon pool by folate	3705	metH	135.1	13	7	0.21	0.1
22	PA1922	NP_250612	A0A8G2RGF4;A0A8G4N5L4;G3XCL2	N/A	Q9I2I2	Q9I2I2_PSEAE	K16089	N/A	TonB-dependent receptor [Pseudomonas aeruginosa PAO1]	653	Transport of small molecules	1962	0	72.3	9	33	0.24	0.92
23	PA1923	NP_250613	A0A367LZG5;A0A8A9AT19;A0A8G4I902;A0A8G4LP96;A0A8G6Y8X1;A0A8G7AFP0;A0A8G7IFL2;A0A8G7PKV4	N/A	Q9I2I1	Q9I2I1_PSEAE	K02230	Porphyrin metabolism;Metabolic pathways;Biosynthesis of cofactors	cobaltochelatase subunit CobN [Pseudomonas aeruginosa PAO1]	1281	Biosynthesis of cofactors, prosthetic groups and carriers	3846	0	140.3	159	173	2.32	2.38
24	PA1924	NP_250614	A0A069Q8S1	N/A	Q9I2I0	Q9I2I0_PSEAE	N/A	N/A	hypothetical protein PA1924 [Pseudomonas aeruginosa PAO1]	158	Hypothetical unclassified unknown	477	0	17.7	3	3	0.33	0.33
25	PA1925	NP_250615	A0A072ZBS6	N/A	Q9I2H9	Q9I2H9_PSEAE	N/A	N/A	hypothetical protein PA1925 [Pseudomonas aeruginosa PAO1]	108	Hypothetical unclassified unknown	327	0	11.8	2	3	0.25	0.37
26	PA1927	NP_250617	A0A5K1SIF4;A0A8G2PYI8	N/A	P57703	METE_PSEAE	K00549	Cysteine and methionine metabolism;Metabolic pathways;Biosynthesis of secondary metabolites;Biosynthesis of amino acids	5-methyltetrahydropteroyltriglutamate--homocysteine methyltransferase [Pseudomonas aeruginosa PAO1]	766	Amino acid biosynthesis and metabolism,Methionine metabolism	2301	metE	86.2	56	27	1.15	0.57
27	PA1941	NP_250631	A0A8F9NQE6	N/A	Q9I2G3	Q9I2G3_PSEAE	N/A	N/A	hypothetical protein PA1941 [Pseudomonas aeruginosa PAO1]	631	Hypothetical unclassified unknown	1896	0	70.9	4	9	0.1	0.21
28	PA2242	NP_250932	A0A8G6AD59	N/A	Q9I1M7	Q9I1M7_PSEAE	K21005	N/A	hypothetical protein PA2242 [Pseudomonas aeruginosa PAO1]	355	Hypothetical unclassified unknown	1068	pslL	39.9	1	1	0.03	0.03
29	PA2408	NP_251098	A0A8G3VEB2	N/A	Q9I173	Q9I173_PSEAE	K09817	N/A	ABC transporter ATP-binding protein [Pseudomonas aeruginosa PAO1]	251	Transport of small molecules	756	fpvD	27.1	1	1	0.08	0.09
30	PA2423	NP_251113	A0A8G7T846	N/A	Q9I158	Q9I158_PSEAE	N/A	N/A	hypothetical protein PA2423 [Pseudomonas aeruginosa PAO1]	264	Hypothetical unclassified unknown	795	0	30.6	1	1	0.04	0.04
31	PA2437	NP_251127	A0A8G2VL61	N/A	Q9I145	Q9I145_PSEAE	N/A	N/A	hypothetical protein PA2437 [Pseudomonas aeruginosa PAO1]	346	Membrane proteins	1041	0	36.7	1	4	0.06	0.3
32	PA2438	NP_251128	A0A8G3B5B7	N/A	Q9I144	Q9I144_PSEAE	K04087	N/A	hypothetical protein PA2438 [Pseudomonas aeruginosa PAO1]	341	Hypothetical unclassified unknown	1026	0	37.3	10	9	0.38	0.32
33	PA2439	NP_251129	A0A5F1C9V1	N/A	Q9I143	Q9I143_PSEAE	N/A	N/A	hypothetical protein PA2439 [Pseudomonas aeruginosa PAO1]	666	Membrane proteins	2001	0	70.5	4	5	0.07	0.09
34	PA2687	NP_251377	A0A3M5DCG1	2.7.13.3	Q04804	PFES_PSEAE	K19609	Two-component system	two-component sensor histidine kinase PfeS [Pseudomonas aeruginosa PAO1]	446	Two component regulatory systems,Two-component System	1341	pfeS	50.5	2	1	0.08	0.04
35	PA2837	NP_251527	A0A8A4EV53	N/A	Q9I006	Q9I006_PSEAE	N/A	N/A	hypothetical protein PA2837 [Pseudomonas aeruginosa PAO1]	479	Transport of small molecules	1440	0	52	1	1	Could Not Be Accurately Determined	Could Not Be Accurately Determined
36	PA2908	NP_251598	A0A8G4BNN6	N/A	Q9HZT9	CBID_PSEAE	K02188	Porphyrin metabolism;Metabolic pathways;Biosynthesis of cofactors	cobalt-precorrin-5B C(1)-methyltransferase [Pseudomonas aeruginosa PAO1]	366	Biosynthesis of cofactors, prosthetic groups and carriers,Cobalamin biosynthesis	1101	cbiD	38.1	1	1	Could Not Be Accurately Determined	Could Not Be Accurately Determined
37	PA2911	NP_251601	A0A8B4ZZY6;A0A8G5QDC9;Q9HZT6	N/A	Q9HZT6	Q9HZT6_PSEAE	K02014	N/A	TonB-dependent receptor [Pseudomonas aeruginosa PAO1]	718	Membrane proteins,Transport of small molecules	2157	0	80.3	11	36	0.33	0.88
38	PA2913	NP_251603	A0A080VKD3	N/A	Q9HZT4	Q9HZT4_PSEAE	K02016	N/A	hypothetical protein PA2913 [Pseudomonas aeruginosa PAO1]	323	Transport of small molecules	972	0	35.4	1	3	0.05	0.19
39	PA3138	NP_251828	A0A509JNB3	N/A	P72174	UVRB_PSEAE	K03702	N/A	excinuclease ABC subunit B [Pseudomonas aeruginosa PAO1]	670	DNA replication recombination modification and repair	2013	uvrB	76.1	1	1	0.03	0.03
40	PA3165	NP_251855	A0A8G3K7R5	N/A	Q9HZ68	HIS82_PSEAE	K00817	Histidine metabolism;Tyrosine metabolism;Phenylalanine metabolism;Phenylalanine, tyrosine and tryptophan biosynthesis;Metabolic pathways;Biosynthesis of secondary metabolites;Biosynthesis of amino acids	histidinol-phosphate aminotransferase [Pseudomonas aeruginosa PAO1]	369	Amino acid biosynthesis and metabolism,Histidine metabolism,Phenylalanine metabolism,Phenylalanine, tyrosine and tryptophan biosynthesis	1110	hisC2	39.5	1	1	0.06	0.06
41	PA3247	NP_251937	A0A077JT55	3.4.11.-	Q9HYZ3	APEB_PSEAE	K01267	N/A	aminopeptidase [Pseudomonas aeruginosa PAO1]	429	Hypothetical unclassified unknown	1290	0	46.7	1	1	0.03	0.03
42	PA3281	NP_251971	A0A072ZRS4	N/A	Q9HYW2	Q9HYW2_PSEAE	N/A	N/A	hypothetical protein PA3281 [Pseudomonas aeruginosa PAO1]	196	Membrane proteins	591	0	21.6	1	2	0.05	0.11
43	PA3442	NP_252132	A0A367M548;A0A8G3DEN9	N/A	Q9HYG4	SSUB1_PSEAE	K15555	Sulfur metabolism	aliphatic sulfonates ABC transporter ATP-binding subunit [Pseudomonas aeruginosa PAO1]	274	Transport of small molecules	825	0	29.8	8	4	0.48	0.23
44	PA3443	NP_252133	A0A077JSB0	N/A	Q9HYG3	Q9HYG3_PSEAE	K15554	Sulfur metabolism	ABC transporter permease [Pseudomonas aeruginosa PAO1]	262	Membrane proteins,Transport of small molecules	789	0	28.5	2	2	0.1	0.1
45	PA3460	NP_252150	A0A8G2S7F5	N/A	Q9HYE6	Q9HYE6_PSEAE	N/A	N/A	acetyltransferase [Pseudomonas aeruginosa PAO1]	585	Putative enzymes	1758	0	65	1	1	0.02	0.02
46	PA3597	NP_252287	A0A0C6F5B2	N/A	Q9HY29	Q9HY29_PSEAE	K14052	N/A	amino acid permease [Pseudomonas aeruginosa PAO1]	440	Membrane proteins,Transport of small molecules	1323	0	47.3	2	3	0.05	0.08
47	PA3601	NP_252291	A0A071KZY7	N/A	Q9HY25	RL31B_PSEAE	K02909	N/A	50S ribosomal protein L31 type B [Pseudomonas aeruginosa PAO1]	87	Translation post translation modification degradation	264	rpmE2	9.5	3	3	0.61	0.61
48	PA3622	NP_252312	A0A0C7AMI3	N/A	P45684	RPOS_PSEAE	K03087	Biofilm formation - Vibrio cholerae	RNA polymerase sigma factor RpoS [Pseudomonas aeruginosa PAO1]	334	Transcriptional regulators	1005	rpoS	38.2	1	2	0.04	0.12
49	PA3634	NP_252324	A0A8G2V3T1	N/A	Q9HXZ6	FTSB_PSEAE	K05589	N/A	cell division protein FtsB [Pseudomonas aeruginosa PAO1]	94	Hypothetical unclassified unknown	285	0	10.9	2	1	0.32	0.2
50	PA3798	NP_252487	A0A069Q5M3	N/A	Q9HXJ9	Q9HXJ9_PSEAE	K14287	N/A	aminotransferase [Pseudomonas aeruginosa PAO1]	382	Putative enzymes	1149	0	42.6	2	1	0.1	0.08
51	PA3895	NP_252584	A0A072ZFG9	N/A	Q9HXB8	Q9HXB8_PSEAE	N/A	N/A	transcriptional regulator [Pseudomonas aeruginosa PAO1]	317	Transcriptional regulators	954	0	35	1	1	0.05	0.05
52	PA3952	NP_252641	A0A8G3X6W5	N/A	Q9HX64	Q9HX64_PSEAE	K09945	N/A	hypothetical protein PA3952 [Pseudomonas aeruginosa PAO1]	238	Hypothetical unclassified unknown	576	0	19.8	1	7	0.06	0.59
53	PA3965	NP_252654	A0A072ZE65	N/A	Q9HX51	Q9HX51_PSEAE	K03719	N/A	transcriptional regulator [Pseudomonas aeruginosa PAO1]	169	Transcriptional regulators	510	0	19.3	1	1	0.12	0.12
54	PA4065	NP_252754	A0A8B4ZBM1;Q9HWW3	N/A	Q9HWW3	Q9HWW3_PSEAE	K02004	N/A	hypothetical protein PA4065 [Pseudomonas aeruginosa PAO1]	421	Membrane proteins	1266	0	45.8	17	23	0.52	0.75
55	PA4109	NP_252798	A0A6M6IGK9	N/A	P24734	AMPR_PSEAE	K17850	beta-Lactam resistance	transcriptional regulator AmpR [Pseudomonas aeruginosa PAO1]	296	Antibiotic resistance and susceptibility,Transcriptional regulators	891	ampR	32.6	1	1	0.03	0.03
56	PA4138	NP_252827	A0A6B1YFI1	6.1.1.1	Q9HWP3	SYY1_PSEAE	K01866	N/A	tyrosine--tRNA ligase [Pseudomonas aeruginosa PAO1]	412	Amino acid biosynthesis and metabolism,Aminoacyl-tRNA biosynthesis,Phenylalanine, tyrosine and tryptophan biosynthesis,Translation post translation modification degradation	1239	tyrS	45.1	10	7	0.47	0.36
57	PA4170	NP_252859	A0A8G6M7T3	N/A	Q9HWL1	Q9HWL1_PSEAE	N/A	N/A	hypothetical protein PA4170 [Pseudomonas aeruginosa PAO1]	310	Hypothetical unclassified unknown	933	0	33	3	2	0.13	0.07
58	PA4388	NP_253078	A0A0C7CZM7	N/A	Q9HW16	Q9HW16_PSEAE	K07226	Porphyrin metabolism;Biosynthesis of secondary metabolites	hypothetical protein PA4388 [Pseudomonas aeruginosa PAO1]	244	Hypothetical unclassified unknown	735	0	27	2	1	0.06	0.06
59	PA4448	NP_253138	A0A8G6FQU5	N/A	Q9HVW9	HISX_PSEAE	K00013	Histidine metabolism;Metabolic pathways;Biosynthesis of secondary metabolites;Biosynthesis of amino acids	histidinol dehydrogenase [Pseudomonas aeruginosa PAO1]	440	Amino acid biosynthesis and metabolism,Histidine metabolism	1323	hisD	47.2	1	2	0.02	0.06
60	PA4511	NP_253201	A0A0H2ZGP1	3.5.2.9	Q9HVR0	Y4511_PSEAE	K07160	Glutathione metabolism;Metabolic pathways	hypothetical protein PA4511 [Pseudomonas aeruginosa PAO1]	251	Hypothetical unclassified unknown	756	0	27.2	1	1	0.04	0.04
61	PA4565	NP_253255	A0A8G3CXB7	N/A	Q9HVL9	PROB_PSEAE	K00931	Arginine and proline metabolism;Carbapenem biosynthesis;Metabolic pathways;Biosynthesis of secondary metabolites;Biosynthesis of amino acids	gamma-glutamyl kinase [Pseudomonas aeruginosa PAO1]	372	Amino acid biosynthesis and metabolism,Arginine and proline metabolism,Urea cycle and metabolism of amino groups	1119	proB	39.8	2	2	0.11	0.08
62	PA4625	NP_253315	A0A1C7BWW3;A0A8G6MI61	N/A	Q9HVG6	Q9HVG6_PSEAE	N/A	N/A	hypothetical protein PA4625 [Pseudomonas aeruginosa PAO1]	2154	Cell wall LPS capsule,Secreted factors (toxins, enzymes, alginate),Two-partner secretion system	6465	cdrA	219.8	1	4	Could Not Be Accurately Determined	0.02
63	PA4676	NP_253365	A0A072ZBL6	4.2.1.1	Q9HVB9	Q9HVB9_PSEAE	K01673	Nitrogen metabolism;Metabolic pathways	carbonic anhydrase [Pseudomonas aeruginosa PAO1]	215	Adaptation protection,Putative enzymes	648	psCA3	24.2	3	1	0.21	0.08
64	PA4707	NP_253395	A0A2R3J2G0	N/A	Q9HV91	Q9HV91_PSEAE	K25133	N/A	ABC transporter permease [Pseudomonas aeruginosa PAO1]	327	Membrane proteins,Transport of small molecules	984	phuU	33.6	1	1	0.05	0.05
65	PA4788	NP_253476	A0A0H2ZHY8	N/A	Q9HV20	Q9HV20_PSEAE	N/A	N/A	hypothetical protein PA4788 [Pseudomonas aeruginosa PAO1]	285	Hypothetical unclassified unknown	858	0	31.2	1	1	0.05	0.05
66	PA4836	NP_253523	A0A7M2ZZU4	N/A	Q9HUX4	Q9HUX4_PSEAE	K23120	D-Amino acid metabolism;Metabolic pathways	hypothetical protein PA4836 [Pseudomonas aeruginosa PAO1]	263	Hypothetical unclassified unknown	792	cntL	28.9	11	4	0.63	0.25
67	PA4837	NP_253524	A0A080VSF7;A0A8G2VVE0	N/A	Q9HUX3	Q9HUX3_PSEAE	K02014	N/A	hypothetical protein PA4837 [Pseudomonas aeruginosa PAO1]	708	Membrane proteins,Transport of small molecules	2127	cntO	79.1	26	52	0.64	1.2
68	PA4838	NP_253525	A0A069Q455	N/A	Q9HUX2	Q9HUX2_PSEAE	N/A	N/A	hypothetical protein PA4838 [Pseudomonas aeruginosa PAO1]	384	Hypothetical unclassified unknown	1155	0	42.7	1	4	0.05	0.12
69	PA4894	NP_253581	A0A0A8RED3	N/A	Q9HUR9	Q9HUR9_PSEAE	K03192	N/A	hypothetical protein PA4894 [Pseudomonas aeruginosa PAO1]	190	Membrane proteins	573	0	19	1	1	0.06	0.06
70	PA5014	NP_253701	A0A2Z1GAC6;A0A8G4B2T8	N/A	Q9HUF4	GLNE_PSEAE	K00982	N/A	bifunctional glutamine-synthetase adenylyltransferase/deadenyltransferase [Pseudomonas aeruginosa PAO1]	982	Translation post translation modification degradation	2949	glnE	110.1	1	1	0.01	Could Not Be Accurately Determined
71	PA5035	NP_253722	A0A8G3A7K2	N/A	G3XD09	G3XD09_PSEAE	K00266	Alanine, aspartate and glutamate metabolism;Nitrogen metabolism;Metabolic pathways;Biosynthesis of secondary metabolites;Microbial metabolism in diverse environments;Biosynthesis of amino acids	glutamate synthase subunit beta [Pseudomonas aeruginosa PAO1]	477	Amino acid biosynthesis and metabolism,Glutamate metabolism,Nitrogen metabolism	1434	gltD	52.6	2	1	0.07	0.04
72	PA5214	NP_253901	A0A8G3YCZ1;A0A8G5CT47	N/A	Q9HTX6	GCSH2_PSEAE	K02437	Glycine, serine and threonine metabolism;Glyoxylate and dicarboxylate metabolism;Lipoic acid metabolism;Metabolic pathways;Biosynthesis of secondary metabolites;Carbon metabolism	glycine cleavage system protein H [Pseudomonas aeruginosa PAO1]	129	Amino acid biosynthesis and metabolism,Central intermediary metabolism,Glycine, serine and threonine metabolism	390	gcvH1	13.6	1	2	0.06	0.06
73	PA5227	NP_253914	A0A069Q1A5	N/A	Q9HTW3	ZAPA_PSEAE	K09888	N/A	hypothetical protein PA5227 [Pseudomonas aeruginosa PAO1]	104	Hypothetical unclassified unknown	315	0	11.7	1	2	0.31	0.4
74	PA5338	NP_254025	A0A8G2RSB1	N/A	Q9HTM0	Q9HTM0_PSEAE	K01139	Purine metabolism;Metabolic pathways	guanosine-3',5'-bis(diphosphate) 3'-pyrophosphohydrolase [Pseudomonas aeruginosa PAO1]	701	Adaptation protection,Nucleotide biosynthesis and metabolism,Purine metabolism	2106	spoT	78.9	1	2	0.03	0.08
75	PA5374	NP_254061	A0A069Q613;A0A3M5E010	N/A	Q9HTJ0	BETI_PSEAE	K02167	N/A	BetI family transcriptional regulator [Pseudomonas aeruginosa PAO1]	197	Transcriptional regulators	594	betI	21.9	1	3	Could Not Be Accurately Determined	0.24
76	PA5436	NP_254123	A0A069Q656	6.3.4.14	Q9HTD0	Q9HTD0_PSEAE	K01959	Citrate cycle (TCA cycle);Pyruvate metabolism;Carbon fixation pathways in prokaryotes;Metabolic pathways;Microbial metabolism in diverse environments;Carbon metabolism;Biosynthesis of amino acids	acetyl-CoA carboxylase subunit alpha [Pseudomonas aeruginosa PAO1]	471	Central intermediary metabolism	1416	0	51.8	1	1	0.04	0.07
77	PA5447	NP_254134	A0A8G4M5Z0	N/A	Q9HTC0	Q9HTC0_PSEAE	K24657	N/A	glycosyltransferase WbpZ [Pseudomonas aeruginosa PAO1]	381	Cell wall LPS capsule,Lipopolysaccharide biosynthesis	1146	wbpZ	43.4	2	1	0.1	0.04
78	PA5456	NP_254143	A0A8G3MQ89	N/A	Q9HTB4	Q9HTB4_PSEAE	N/A	N/A	hypothetical protein PA5456 [Pseudomonas aeruginosa PAO1]	433	Cell wall LPS capsule,common polysaccharide antigen (CBA) biosynthesis	1302	0	49.4	3	3	0.09	0.09
79	PA5458	NP_254145	A0A3M5EL99	N/A	Q9HTB2	Q9HTB2_PSEAE	N/A	N/A	acyltransferase [Pseudomonas aeruginosa PAO1]	380	Cell wall LPS capsule,common polysaccharide antigen (CBA) biosynthesis,Membrane proteins	1143	0	42.4	1	1	Could Not Be Accurately Determined	0.02
80	PA5466	NP_254153	A0A8H2F5E3	N/A	Q9HTA4	Q9HTA4_PSEAE	K13936	N/A	hypothetical protein PA5466 [Pseudomonas aeruginosa PAO1]	314	Membrane proteins	945	0	32.8	1	1	0.03	0.03
81	PA5476	NP_254163	A0A8I1CY28	N/A	Q9HT94	Q9HT94_PSEAE	N/A	N/A	citrate transporter [Pseudomonas aeruginosa PAO1]	429	Membrane proteins,Transport of small molecules	1290	citA	46.2	1	1	0.03	0.03
82	PA5535	NP_254222	V6AQ09	N/A	Q9HT39	Q9HT39_PSEAE	N/A	N/A	hypothetical protein PA5535 [Pseudomonas aeruginosa PAO1]	400	Hypothetical unclassified unknown	1203	0	45.1	14	2	0.5	0.08
83	PA5539	NP_254226	A0A8B5A8W3;A0A8G3ZA69	N/A	Q9HT35	GCH4_PSEAE	K09007	Folate biosynthesis;Metabolic pathways;Biosynthesis of cofactors	GTP cyclohydrolase [Pseudomonas aeruginosa PAO1]	298	Hypothetical unclassified unknown	897	0	32.4	2	1	0.22	0.11

## Sheet: LB_log_sta
Protein ID	Locus_Tag	## Accession	Provided_UniProt_Accessions	Enzyme_Classification_Number	UniProtKB Accession	UniProtKB ID	KEGG_Ortholog	Pathways	Annotation	Sequence_Length	Function	Gene Length	Gene Name	Estimated MW (kDa)	CumulativePartialPeptideSequences		AverageSequenceCoverage
															LB_log	LB_sta	LB_log	LB_sta
1	PA0017	NP_248707	A0A241XPC4;A0A8F9JTV7	2.1.1.176	Q9I7A9	RSMB_PSEAE	K03500	N/A	Ribosomal RNA small subunit methyltransferase B [Pseudomonas aeruginosa PAO1]	434	Hypothetical unclassified unknown	1305	0	47.2	1	1	0.05	0.03
2	PA0020	NP_248710	A0A072ZH08	N/A	Q9I7A7	Q9I7A7_PSEAE	N/A	N/A	hypothetical protein PA0020 [Pseudomonas aeruginosa PAO1]	341	Hypothetical unclassified unknown	1026	tsaP	37.6	5	2	0.19	0.13
3	PA0085	NP_248775	A0A069QCS0	N/A	Q9I747	HCP1_PSEAE	K11903	N/A	protein secretion apparatus assembly protein [Pseudomonas aeruginosa PAO1]	162	Secreted factors (toxins, enzymes, alginate)	489	hcp1	17.4	4	1	0.36	0.1
4	PA0176	NP_248866	A0A8G5AD96;A0A8I0ZND0	N/A	Q9I6V6	Q9I6V6_PSEAE	K03406	Two-component system	aerotaxis transducer Aer2 [Pseudomonas aeruginosa PAO1]	679	Adaptation protection,Chemotactic transducer (MCP),Chemotaxis,Chemotaxis	2040	0	72.6	1	5	0.03	0.12
5	PA0267	NP_248958	A0A8G6IVH4	N/A	Q9I6M3	Q9I6M3_PSEAE	N/A	N/A	hypothetical protein PA0267 [Pseudomonas aeruginosa PAO1]	399	Hypothetical unclassified unknown	1200	0	43.3	1	1	0.02	0.02
6	PA0332	NP_249023	A0A080VLX3	N/A	Q9I6F9	Q9I6F9_PSEAE	N/A	N/A	hypothetical protein PA0332 [Pseudomonas aeruginosa PAO1]	155	Hypothetical unclassified unknown	468	0	16.8	1	1	0.14	0.14
7	PA0335	NP_249026	A0A080W1K6	N/A	Q9I6F6	Q9I6F6_PSEAE	N/A	N/A	hypothetical protein PA0335 [Pseudomonas aeruginosa PAO1]	217	Hypothetical unclassified unknown	654	0	24.4	1	2	0.07	0.12
8	PA0423	NP_249114	A0A2R3J5B6	N/A	Q9I690	Y423_PSEAE	N/A	N/A	hypothetical protein PA0423 [Pseudomonas aeruginosa PAO1]	191	Secreted factors (toxins, enzymes, alginate)	576	pasP	20.8	3	2	0.21	0.18
9	PA0427	NP_249118	A0A8G3SVP6	N/A	Q51487	OPRM_PSEAE	K18139	beta-Lactam resistance	outer membrane protein OprM [Pseudomonas aeruginosa PAO1]	485	Antibiotic resistance and susceptibility,Membrane proteins,Transport of small molecules	1458	oprM	52.6	3	2	0.07	0.09
10	PA0511	NP_249202	A0A8G4CW63	N/A	G3XD10	G3XD10_PSEAE	K24868	N/A	heme d1 biosynthesis protein NirJ [Pseudomonas aeruginosa PAO1]	387	Biosynthesis of cofactors, prosthetic groups and carriers,Biosynthesis of heme d1,Denitrification,Energy metabolism	1164	nirJ	44	1	1	0.03	0.03
11	PA0516	NP_249207	A0A6A9JS22	N/A	Q51480	NIRF_PSEAE	K19345	N/A	heme d1 biosynthesis protein NirF [Pseudomonas aeruginosa PAO1]	392	Biosynthesis of cofactors, prosthetic groups and carriers,Biosynthesis of heme d1,Denitrification,Energy metabolism	1179	nirF	43.3	10	9	0.4	0.31
12	PA0519	NP_249210	A0A5K1SDI1	N/A	P24474	NIRS_PSEAE	K15864	Nitrogen metabolism;Metabolic pathways;Microbial metabolism in diverse environments	nitrite reductase [Pseudomonas aeruginosa PAO1]	568	Denitrification,Energy metabolism	1707	nirS	62.7	4	8	0.1	0.25
13	PA0520	NP_249211	A0A069Q906	N/A	Q51481	NIRQ_PSEAE	K04748	N/A	denitrification regulatory protein NirQ [Pseudomonas aeruginosa PAO1]	260	Central intermediary metabolism,Denitrification,Energy metabolism	783	nirQ	28.9	9	6	0.48	0.31
14	PA0545	NP_249236	A0A0A8R9X9	N/A	Q9I5Z1	Q9I5Z1_PSEAE	N/A	N/A	hypothetical protein PA0545 [Pseudomonas aeruginosa PAO1]	434	Putative enzymes	1305	0	48.1	2	4	0.07	0.13
15	PA0577	NP_249268	A0A8G3B2T4;A0A8G6J0R8	N/A	Q9I5W0	DNAG_PSEAE	K02316	N/A	DNA primase [Pseudomonas aeruginosa PAO1]	664	DNA replication recombination modification and repair	1995	dnaG	74.2	1	1	Could Not Be Accurately Determined	0.01
16	PA0594	NP_249285	A0A8G4MGQ7	N/A	Q9I5U3	SURA_PSEAE	K03771	N/A	chaperone SurA [Pseudomonas aeruginosa PAO1]	430	Adaptation protection,Chaperones heatshock protein,Translation post translation modification degradation	1293	surA	48.4	1	2	0.04	0.07
17	PA0618	NP_249309	A0A8G5T8H1	N/A	G3XCX5	G3XCX5_PSEAE	N/A	N/A	bacteriophage protein [Pseudomonas aeruginosa PAO1]	295	Related to phage, transposon, or plasmid	888	0	31.9	1	4	0.05	0.21
18	PA0660	NP_249351	A0A485I4T1	N/A	Q9I5R1	Q9I5R1_PSEAE	K00459	Nitrogen metabolism;Metabolic pathways	hypothetical protein PA0660 [Pseudomonas aeruginosa PAO1]	322	Hypothetical unclassified unknown	969	0	34.8	1	1	Could Not Be Accurately Determined	0.07
19	PA0771	NP_249462	A0A2R3IQM7	N/A	Q9XCX8	ERA_PSEAE	K03595	N/A	GTPase Era [Pseudomonas aeruginosa PAO1]	305	Cell division,Translation post translation modification degradation	918	era	34.5	2	1	0.08	0.03
20	PA0782	NP_249473	A0A8G3U124;A0A8G6VSQ6	N/A	Q9I5F6	Q9I5F6_PSEAE	K13821	Alanine, aspartate and glutamate metabolism;Arginine and proline metabolism;Metabolic pathways;Biosynthesis of secondary metabolites	bifunctional proline dehydrogenase/pyrroline-5-carboxylate dehydrogenase [Pseudomonas aeruginosa PAO1]	1060	Amino acid biosynthesis and metabolism,Arginine and proline metabolism,Glutamate metabolism	3183	putA	115.6	23	46	0.33	0.68
21	PA0888	NP_249579	A0A0A8RMC9	N/A	G3XD47	G3XD47_PSEAE	K10022	N/A	arginine/ornithine ABC transporter substrate-binding protein AotJ [Pseudomonas aeruginosa PAO1]	259	Transport of small molecules	780	aotJ	28	1	1	0.06	0.03
22	PA0918	NP_249609	A0A077JNZ2	N/A	Q9I539	Q9I539_PSEAE	K12262	N/A	cytochrome b561 [Pseudomonas aeruginosa PAO1]	182	Energy metabolism	549	0	20.6	2	2	0.13	0.13
23	PA0956	NP_249647	A0A6A9JTK6	6.1.1.15	Q9I502	SYP_PSEAE	K01881	N/A	proline--tRNA ligase [Pseudomonas aeruginosa PAO1]	571	Amino acid biosynthesis and metabolism,Aminoacyl-tRNA biosynthesis,Arginine and proline metabolism,Translation post translation modification degradation	1716	proS	63.1	1	3	0.04	0.09
24	PA0974	NP_249665	A0A0H2Z7H9	N/A	G3XDB2	G3XDB2_PSEAE	N/A	N/A	hypothetical protein PA0974 [Pseudomonas aeruginosa PAO1]	274	Hypothetical unclassified unknown	825	0	29.1	1	3	0.05	0.29
25	PA1010	NP_249701	A0A072ZMX0	4.3.3.7	Q9I4W3	DAPA_PSEAE	K01714	Monobactam biosynthesis;Lysine biosynthesis;Metabolic pathways;Biosynthesis of secondary metabolites;Microbial metabolism in diverse environments;Biosynthesis of amino acids	4-hydroxy-tetrahydrodipicolinate synthase [Pseudomonas aeruginosa PAO1]	292	Amino acid biosynthesis and metabolism,Lysine biosynthesis	879	dapA	31.4	2	3	0.09	0.1
26	PA1018	NP_249709	A0A1C7BI67	N/A	G3XD07	G3XD07_PSEAE	N/A	N/A	hypothetical protein PA1018 [Pseudomonas aeruginosa PAO1]	288	Hypothetical unclassified unknown	867	0	31.6	1	1	0.03	0.03
27	PA1069	NP_249760	A0A0A8RJB2;A0A8G6XT04	N/A	Q9I4Q5	Q9I4Q5_PSEAE	N/A	N/A	hypothetical protein PA1069 [Pseudomonas aeruginosa PAO1]	764	Hypothetical unclassified unknown	2295	0	86.1	3	9	0.06	0.17
28	PA1089	NP_249780	A0A0F7QRN2	N/A	Q9I4P0	Q9I4P0_PSEAE	N/A	N/A	hypothetical protein PA1089 [Pseudomonas aeruginosa PAO1]	200	Hypothetical unclassified unknown	603	0	22.5	1	2	0.06	0.16
29	PA1150	NP_249841	A0A8G3VH37	N/A	Q06584	PYS2_PSEAE	N/A	N/A	pyocin-S2 [Pseudomonas aeruginosa PAO1]	689	Adaptation protection,Secreted factors (toxins, enzymes, alginate)	2070	pys2	73.9	2	1	0.04	0.02
30	PA1179	NP_249870	A0A0N9R2K7	N/A	Q9I4F9	Q9I4F9_PSEAE	K07660	Cationic antimicrobial peptide (CAMP) resistance;Two-component system	two-component response regulator PhoP [Pseudomonas aeruginosa PAO1]	225	Transcriptional regulators,Two component regulatory systems,Two-component System	678	phoP	25.7	6	6	0.35	0.4
31	PA1301	NP_249992	A0A8D9N437;A0A8E5UPM5	N/A	Q9I443	Q9I443_PSEAE	K07165	Two-component system	transmembrane sensor [Pseudomonas aeruginosa PAO1]	327	Membrane proteins,Transcriptional regulators	984	hxuR	36.6	1	1	Could Not Be Accurately Determined	0.04
32	PA1429	NP_250120	A0A8G3V3M0	N/A	Q9I3R5	Q9I3R5_PSEAE	N/A	N/A	cation-transporting P-type ATPase [Pseudomonas aeruginosa PAO1]	902	Membrane proteins,Transport of small molecules	2709	0	97	11	9	0.21	0.23
33	PA1476	NP_250167	A0A072ZXA5	N/A	Q9I3N6	CCMB_PSEAE	K02194	N/A	heme exporter protein CcmB [Pseudomonas aeruginosa PAO1]	223	Membrane proteins,Transport of small molecules	672	ccmB	23.4	1	1	0.03	0.03
34	PA1546	NP_250237	A0A8G2WJB4	N/A	P77915	HEMN_PSEAE	K02495	Porphyrin metabolism;Metabolic pathways;Biosynthesis of secondary metabolites;Biosynthesis of cofactors	oxygen-independent coproporphyrinogen-III oxidase [Pseudomonas aeruginosa PAO1]	460	Biosynthesis of cofactors, prosthetic groups and carriers	1383	hemN	52.5	2	5	0.05	0.18
35	PA1549	NP_250240	A0A6B1YKK2	N/A	Q9I3G8	Q9I3G8_PSEAE	K01533	N/A	cation-transporting P-type ATPase [Pseudomonas aeruginosa PAO1]	811	Membrane proteins,Transport of small molecules	2436	copA2	87.2	1	3	0.01	0.07
36	PA1600	NP_250291	A0A8G2RVN4	N/A	Q9I3C1	Q9I3C1_PSEAE	N/A	N/A	cytochrome C [Pseudomonas aeruginosa PAO1]	433	Energy metabolism	1302	0	46.2	1	1	0.06	0.04
37	PA1636	NP_250327	A0A8G3ZQZ5	N/A	Q9I389	Q9I389_PSEAE	K07646	Two-component system	two-component sensor KdpD [Pseudomonas aeruginosa PAO1]	885	Two component regulatory systems,Two-component System	2658	kdpD	97	1	1	0.03	0.01
38	PA1642	NP_250333	A0A069PZH1	2.7.9.3	Q9I383	SELD_PSEAE	K01008	Metabolic pathways	selenide, water dikinase [Pseudomonas aeruginosa PAO1]	344	Selenoamino acid metabolism,Translation post translation modification degradation	1035	selD	36.4	2	1	0.09	0.06
39	PA1647	NP_250338	A0A8G2RVY6	N/A	Q9I378	Q9I378_PSEAE	N/A	N/A	sulfate transporter [Pseudomonas aeruginosa PAO1]	573	Membrane proteins,Transport of small molecules	1722	0	60.7	2	2	0.05	0.05
40	PA1673	NP_250364	A0A072ZI31	N/A	Q9I352	HEMTB_PSEAE	K07216	N/A	bacteriohemerythrin [Pseudomonas aeruginosa PAO1]	153	Hypothetical unclassified unknown	462	mhr	17.9	1	2	0.07	0.18
41	PA1687	NP_250378	A0A8G6T7S4	N/A	Q9X6R0	SPEE1_PSEAE	K00797	Cysteine and methionine metabolism;Arginine and proline metabolism;Glutathione metabolism;Metabolic pathways	polyamine aminopropyltransferase [Pseudomonas aeruginosa PAO1]	286	Amino acid biosynthesis and metabolism,Arginine and proline metabolism,Beta-Alanine metabolism,Urea cycle and metabolism of amino groups	861	speE	32.2	1	1	0.05	0.05
42	PA1745	NP_250436	A0A0A8RQ57;A0A2R3IQB3	N/A	Q9I2Z2	Q9I2Z2_PSEAE	N/A	N/A	hypothetical protein PA1745 [Pseudomonas aeruginosa PAO1]	162	Hypothetical unclassified unknown	489	0	18.5	1	5	0.06	0.37
43	PA1746	NP_250437	A0A072ZHX3;A0A8G5QD28	N/A	Q9I2Z1	Q9I2Z1_PSEAE	N/A	N/A	hypothetical protein PA1746 [Pseudomonas aeruginosa PAO1]	168	Hypothetical unclassified unknown	507	0	18.2	3	20	0.26	2.93
44	PA1773	NP_250464	A0A8G7APH8	N/A	G3XD00	G3XD00_PSEAE	K16074	N/A	transporter [Pseudomonas aeruginosa PAO1]	332	Membrane proteins	999	cmaX	37.8	4	3	0.17	0.16
45	PA1789	NP_250480	A0A0H2Z9V8;A0A8G4DMM5	N/A	Q9I2V3	Q9I2V3_PSEAE	N/A	N/A	hypothetical protein PA1789 [Pseudomonas aeruginosa PAO1]	287	Hypothetical unclassified unknown	864	0	31.3	1	13	0.06	0.94
46	PA1794	NP_250485	A0A0F6UET3	N/A	Q9I2U8	SYQ_PSEAE	K01886	Metabolic pathways	glutamine--tRNA ligase [Pseudomonas aeruginosa PAO1]	556	Amino acid biosynthesis and metabolism,Aminoacyl-tRNA biosynthesis,Glutamate metabolism,Translation post translation modification degradation	1671	glnS	62.9	1	2	0.03	0.08
47	PA2023	NP_250713	A0A8G2NCV2	N/A	Q9I291	GALU_PSEAE	K00963	Pentose and glucuronate interconversions;Galactose metabolism;Starch and sucrose metabolism;Amino sugar and nucleotide sugar metabolism;O-Antigen nucleotide sugar biosynthesis;Metabolic pathways;Biosynthesis of secondary metabolites;Biosynthesis of cofactors;Biosynthesis of nucleotide sugars	UTP-glucose-1-phosphate uridylyltransferase [Pseudomonas aeruginosa PAO1]	279	Central intermediary metabolism,Galactose metabolism,Nucleotide sugars metabolism,Pentose and glucuronate interconversions,Starch and sucrose metabolism	840	galU	31.2	1	2	0.04	0.1
48	PA2081	NP_250771	A0A7U1HPA1	N/A	Q9I234	KYNB_PSEAE	K07130	Tryptophan metabolism;Glyoxylate and dicarboxylate metabolism;Metabolic pathways;Biosynthesis of cofactors	kynurenine formamidase KynB [Pseudomonas aeruginosa PAO1]	213	Amino acid biosynthesis and metabolism,anthranilate,kynurenine pathway	642	kynB	23.2	1	1	Could Not Be Accurately Determined	Could Not Be Accurately Determined
49	PA2119	NP_250809	A0A8G2PZH6;A0A8G2VQS3	N/A	Q9I1Z6	Q9I1Z6_PSEAE	N/A	N/A	alcohol dehydrogenase [Pseudomonas aeruginosa PAO1]	366	Putative enzymes	1101	0	38.6	2	1	0.08	0.06
50	PA2265	NP_250955	A0A485EKG2;A0A8G3AAV1	N/A	Q9I1K8	Q9I1K8_PSEAE	K06151	Pentose phosphate pathway;Metabolic pathways;Microbial metabolism in diverse environments	gluconate dehydrogenase [Pseudomonas aeruginosa PAO1]	591	Carbon compound catabolism	1776	0	64.7	6	17	0.06	0.25
51	PA2323	NP_251013	A0A8G2NAQ9	N/A	Q9I1F5	Q9I1F5_PSEAE	K00131	Glycolysis / Gluconeogenesis;Pentose phosphate pathway;Metabolic pathways;Microbial metabolism in diverse environments;Carbon metabolism	glyceraldehyde-3-phosphate dehydrogenase [Pseudomonas aeruginosa PAO1]	541	Carbon compound catabolism,Glycolysis / Gluconeogenesis	1626	gapN	60	2	1	0.07	0.04
52	PA2532	NP_251222	A0A8G4CTC7	N/A	P57668	TPX_PSEAE	K11065	N/A	2-Cys peroxiredoxin [Pseudomonas aeruginosa PAO1]	165	Adaptation protection	498	tpx	17.2	1	2	0.11	0.31
53	PA2575	NP_251265	A0A8G2RS93	N/A	Q9I0R1	Q9I0R1_PSEAE	K07078	N/A	hypothetical protein PA2575 [Pseudomonas aeruginosa PAO1]	200	Hypothetical unclassified unknown	603	0	22.2	1	1	0.09	0.04
54	PA2740	NP_251430	A0A071L1L3	6.1.1.20	Q9I0A3	SYFA_PSEAE	K01889	N/A	phenylalanine--tRNA ligase subunit alpha [Pseudomonas aeruginosa PAO1]	338	Aminoacyl-tRNA biosynthesis,Phenylalanine, tyrosine and tryptophan biosynthesis,Translation post translation modification degradation	1017	pheS	38.1	1	1	0.04	0.02
55	PA2851	NP_251541	A0A1C7BV62;A0A8G3X970	N/A	Q9HZZ2	EFP_PSEAE	K02356	N/A	elongation factor P [Pseudomonas aeruginosa PAO1]	188	Translation post translation modification degradation	567	efp	21	6	2	0.39	0.15
56	PA2854	NP_251544	A0A8G3WVK7	N/A	Q9HZZ0	Q9HZZ0_PSEAE	K16291	N/A	hypothetical protein PA2854 [Pseudomonas aeruginosa PAO1]	323	Hypothetical unclassified unknown	972	0	34.8	1	1	0.05	0.04
57	PA2896	NP_251586	A0A8G2R3D6	N/A	Q9HZV1	Q9HZV1_PSEAE	K03088	N/A	RNA polymerase sigma factor [Pseudomonas aeruginosa PAO1]	194	Transcriptional regulators	585	sbrI	22.3	3	1	0.32	0.07
58	PA2897	NP_251587	A0A069QBG4	N/A	Q9HZV0	Q9HZV0_PSEAE	N/A	N/A	transcriptional regulator [Pseudomonas aeruginosa PAO1]	479	Transcriptional regulators	1440	0	53.5	1	2	0.02	0.06
59	PA2950	NP_251640	V6AD26	1.3.1.9	Q9HZP8	Y2950_PSEAE	K00209	Fatty acid biosynthesis;Butanoate metabolism;Metabolic pathways;Biosynthesis of secondary metabolites;Microbial metabolism in diverse environments;Carbon metabolism;Fatty acid metabolism	reductase [Pseudomonas aeruginosa PAO1]	398	Motility,Protein secretion export apparatus	1197	fabV	43.5	1	3	0.04	0.09
60	PA2974	NP_251664	A0A072ZRM7	N/A	Q9HZN0	Q9HZN0_PSEAE	K01091	Glyoxylate and dicarboxylate metabolism;Metabolic pathways;Biosynthesis of secondary metabolites	hydrolase [Pseudomonas aeruginosa PAO1]	230	Putative enzymes	693	0	25.3	2	1	0.13	0.04
61	PA3002	NP_251692	A0A8G8GPH0	N/A	Q9HZK3	Q9HZK3_PSEAE	K03723	N/A	transcription-repair coupling factor [Pseudomonas aeruginosa PAO1]	1148	DNA replication recombination modification and repair	3447	mfd	128.8	1	2	0.01	0.03
62	PA3007	NP_251697	A0A073A4T8	3.4.21.88	P37452	LEXA_PSEAE	K01356	N/A	LexA repressor [Pseudomonas aeruginosa PAO1]	204	Adaptation protection,Translation post translation modification degradation	615	lexA	22.5	1	2	0.09	0.17
63	PA3026	NP_251716	A0A8A9AD46	N/A	Q9HZI0	Q9HZI0_PSEAE	K00803	Ether lipid metabolism;Metabolic pathways	hypothetical protein PA3026 [Pseudomonas aeruginosa PAO1]	531	Hypothetical unclassified unknown	1596	0	58	1	2	0.03	0.07
64	PA3074	NP_251764	A0A2R3IQ64	N/A	Q9HZD4	Q9HZD4_PSEAE	K07114	N/A	hypothetical protein PA3074 [Pseudomonas aeruginosa PAO1]	586	Hypothetical unclassified unknown	1761	0	65.6	1	2	0.04	0.06
65	PA3081	NP_251771	A0A8G6Y6V3	N/A	Q9HZC7	Q9HZC7_PSEAE	N/A	N/A	hypothetical protein PA3081 [Pseudomonas aeruginosa PAO1]	455	Hypothetical unclassified unknown	1368	0	50.7	2	1	0.09	0.04
66	PA3226	NP_251916	A0A0F6RRC0	N/A	Q9HZ14	Q9HZ14_PSEAE	K01055	Benzoate degradation;Metabolic pathways;Microbial metabolism in diverse environments;Degradation of aromatic compounds	hydrolase [Pseudomonas aeruginosa PAO1]	275	Putative enzymes	828	0	30.5	2	1	0.09	0.05
67	PA3227	NP_251917	A0A8G4DUJ5	N/A	Q59641	PPIA_PSEAE	K03767	Cationic antimicrobial peptide (CAMP) resistance	peptidyl-prolyl cis-trans isomerase A [Pseudomonas aeruginosa PAO1]	187	Chaperones heatshock protein,Translation post translation modification degradation	564	ppiA	20.1	1	1	0.14	0.14
68	PA3268	NP_251958	A0A8F9NX21	N/A	Q9HYX3	Q9HYX3_PSEAE	K16091	N/A	TonB-dependent receptor [Pseudomonas aeruginosa PAO1]	721	Membrane proteins,Transport of small molecules	2166	0	79.4	3	1	0.07	0.05
69	PA3337	NP_252027	A0A069Q7K3;A0A2R3IMU1	5.1.3.20	Q9HYQ8	HLDD_PSEAE	K03274	Lipopolysaccharide biosynthesis;Metabolic pathways;Biosynthesis of nucleotide sugars	ADP-L-glycero-D-mannoheptose-6-epimerase [Pseudomonas aeruginosa PAO1]	332	Cell wall LPS capsule,Fructose and mannose metabolism	999	rfaD	37.4	2	2	0.12	0.11
70	PA3339	NP_252029	A0A077JSV6	N/A	Q9HYQ6	Q9HYQ6_PSEAE	K07001	N/A	patatin-like protein [Pseudomonas aeruginosa PAO1]	728	Membrane proteins,Secreted factors (toxins, enzymes, alginate),Type V secretion system,Type Vd Secretion System	2187	plpD	80.9	1	1	0.03	0.03
71	PA3348	NP_252038	A0A8G6USD0	N/A	O87131	CHER1_PSEAE	K00575	Two-component system	chemotaxis protein methyltransferase [Pseudomonas aeruginosa PAO1]	274	Adaptation protection,Chemotaxis,Chemotaxis	825	cheR1	30.6	1	1	0.07	0.03
72	PA3392	NP_252082	A0A8G6NPR4	N/A	Q9HYL2	NOSZ_PSEAE	K00376	Nitrogen metabolism;Metabolic pathways;Microbial metabolism in diverse environments	nitrous-oxide reductase [Pseudomonas aeruginosa PAO1]	636	Energy metabolism	1911	nosZ	70.7	2	1	0.05	0.03
73	PA3539	NP_252229	A0A8G3CPL2	N/A	Q9HY72	Y3539_PSEAE	K09861	N/A	hypothetical protein PA3539 [Pseudomonas aeruginosa PAO1]	259	Hypothetical unclassified unknown	780	0	29.6	1	1	0.1	0.05
74	PA3562	NP_252252	A0A8G7APQ2	N/A	Q9HY55	Q9HY55_PSEAE	K23993	N/A	PTS system fructose-specific transporter subunit FruI [Pseudomonas aeruginosa PAO1]	956	Central intermediary metabolism,Fructose and mannose metabolism,Transport of small molecules	2871	fruI	101.6	3	1	0.04	0.02
75	PA3575	NP_252265	A0A8G2QU78	N/A	Q9HY45	Q9HY45_PSEAE	N/A	N/A	hypothetical protein PA3575 [Pseudomonas aeruginosa PAO1]	176	Membrane proteins	531	0	19.1	1	2	0.09	0.19
76	PA3613	NP_252303	A0A8G7I146	N/A	Q9HY13	Q9HY13_PSEAE	N/A	N/A	hypothetical protein PA3613 [Pseudomonas aeruginosa PAO1]	801	Hypothetical unclassified unknown	2406	0	88.4	3	7	0.08	0.14
77	PA3614	NP_252304	A0A8A4FSD4	N/A	Q9HY12	Q9HY12_PSEAE	K07576	N/A	hypothetical protein PA3614 [Pseudomonas aeruginosa PAO1]	467	Hypothetical unclassified unknown	1404	0	51.9	2	5	0.06	0.14
78	PA3635	NP_252325	A0A140SKT7	4.2.1.11	Q9HXZ5	ENO_PSEAE	K01689	Glycolysis / Gluconeogenesis;Methane metabolism;Metabolic pathways;Biosynthesis of secondary metabolites;Microbial metabolism in diverse environments;Carbon metabolism;Biosynthesis of amino acids	enolase [Pseudomonas aeruginosa PAO1]	429	Carbon compound catabolism,Energy metabolism,Glycolysis / Gluconeogenesis,Translation post translation modification degradation	1290	eno	45.2	5	5	0.17	0.24
79	PA3690	NP_252380	A0A5E5R7N5;A0A8G3UEJ7	N/A	Q9HXV0	Q9HXV0_PSEAE	K01534	N/A	metal-transporting P-type ATPase [Pseudomonas aeruginosa PAO1]	740	Membrane proteins,Transport of small molecules	2223	0	78.7	10	17	0.23	0.47
80	PA3700	NP_252390	Q9HXU0	6.1.1.6	Q9HXU0	SYK_PSEAE	K04567	N/A	lysine--tRNA ligase [Pseudomonas aeruginosa PAO1]	501	Amino acid biosynthesis and metabolism,Aminoacyl-tRNA biosynthesis,Lysine biosynthesis,Translation post translation modification degradation	1506	lysS	57.3	6	3	0.15	0.07
81	PA3763	NP_252452	A0A2R3J455	6.3.5.3	Q9HXN2	PUR4_PSEAE	K01952	Purine metabolism;Metabolic pathways;Biosynthesis of secondary metabolites	phosphoribosylformylglycinamidine synthase [Pseudomonas aeruginosa PAO1]	1298	Nucleotide biosynthesis and metabolism,Purine metabolism	3897	purL	140.6	1	1	0.02	0.01
82	PA3874	NP_252563	A0A0H2ZF54;A0A6A9KB80	N/A	G3XD87	G3XD87_PSEAE	K00371	Nitrogen metabolism;Metabolic pathways;Microbial metabolism in diverse environments;Two-component system	respiratory nitrate reductase subunit beta [Pseudomonas aeruginosa PAO1]	513	Energy metabolism,Nitrogen metabolism	1542	narH	58.1	28	15	0.85	0.57
83	PA3896	NP_252585	A0A2R3ISI9	N/A	Q9HXB7	Q9HXB7_PSEAE	K00090	Pentose phosphate pathway;Glycine, serine and threonine metabolism;Pyruvate metabolism;Glyoxylate and dicarboxylate metabolism;Metabolic pathways;Biosynthesis of secondary metabolites;Microbial metabolism in diverse environments	2-hydroxyacid dehydrogenase [Pseudomonas aeruginosa PAO1]	325	Putative enzymes	978	0	35.6	1	1	0.02	0.02
84	PA4047	NP_252736	A0A072ZE00	3.5.4.25	Q9HWY1	RIBA_PSEAE	K01497	Riboflavin metabolism;Folate biosynthesis;Metabolic pathways;Biosynthesis of secondary metabolites;Biosynthesis of cofactors	GTP cyclohydrolase II [Pseudomonas aeruginosa PAO1]	205	Biosynthesis of cofactors, prosthetic groups and carriers,Riboflavin metabolism	618	ribA	22.1	1	1	0.06	0.08
85	PA4057	NP_252746	A0A0A8RAC0	N/A	Q9HWX1	NRDR_PSEAE	K07738	N/A	transcriptional regulator NrdR [Pseudomonas aeruginosa PAO1]	154	Nucleotide biosynthesis and metabolism,Transcriptional regulators	465	nrdR	17.9	2	1	0.16	0.08
86	PA4333	NP_253023	A0A071L0G9	4.2.1.2	Q9HW68	Q9HW68_PSEAE	K01676	Citrate cycle (TCA cycle);Pyruvate metabolism;Carbon fixation pathways in prokaryotes;Metabolic pathways;Biosynthesis of secondary metabolites;Microbial metabolism in diverse environments;Carbon metabolism	fumarase [Pseudomonas aeruginosa PAO1]	507	Citrate cycle (TCA cycle),Energy metabolism,Reductive carboxylate cycle (CO2 fixation)	1524	0	54.8	2	1	0.09	0.02
87	PA4398	NP_253088	A0A1C7B8F9	2.7.13.3	Q9HW08	Q9HW08_PSEAE	N/A	N/A	two-component sensor [Pseudomonas aeruginosa PAO1]	698	Two component regulatory systems,Two-component System	2097	0	77.6	2	2	0.06	0.07
88	PA4411	NP_253101	A0A0A8RLH1	6.3.2.8	Q9HW02	MURC_PSEAE	K01924	Metabolic pathways	UDP-N-acetylmuramate--L-alanine ligase [Pseudomonas aeruginosa PAO1]	480	Cell wall LPS capsule,Peptideglycan biosynthesis	1443	murC	51.9	1	1	0.03	0.03
89	PA4450	NP_253140	A0A485GAW6	2.4.2.17	Q9HVW7	MURA_PSEAE	K00790	Amino sugar and nucleotide sugar metabolism;Metabolic pathways;Biosynthesis of nucleotide sugars	UDP-N-acetylglucosamine 1-carboxyvinyltransferase [Pseudomonas aeruginosa PAO1]	421	Cell wall LPS capsule	1266	murA	44.6	4	5	0.11	0.22
90	PA4462	NP_253152	A0A8G3DCL6;A0A8I1CZ36	N/A	P49988	RP54_PSEAE	K03092	Two-component system;Biofilm formation - Vibrio cholerae	RNA polymerase factor sigma-54 [Pseudomonas aeruginosa PAO1]	497	Transcriptional regulators	1494	rpoN	56.1	3	1	0.09	0.02
91	PA4493	NP_253183	A0A8G8K8Q5	N/A	Q9HVS8	Q9HVS8_PSEAE	K15012	Two-component system	DNA-binding response regulator RoxR [Pseudomonas aeruginosa PAO1]	186	Transcriptional regulators,Two component regulatory systems,Two-component System	561	roxR	20.6	1	1	0.08	0.08
92	PA4553	NP_253243	A0A8G2KTF3	N/A	Q9HVM9	Q9HVM9_PSEAE	K02673	N/A	type 4 fimbrial biogenesis protein PilX [Pseudomonas aeruginosa PAO1]	195	Motility,Pilin biosynthesis	588	pilX	21.1	3	2	0.17	0.12
93	PA4564	NP_253254	A0A069PY99	N/A	Q9HVM0	Q9HVM0_PSEAE	K05805	N/A	hypothetical protein PA4564 [Pseudomonas aeruginosa PAO1]	154	Hypothetical unclassified unknown	465	0	16.7	1	4	0.07	0.5
94	PA4647	NP_253336	A0A069PZF3	N/A	Q9HVE5	Q9HVE5_PSEAE	K02824	N/A	uracil permease [Pseudomonas aeruginosa PAO1]	427	Membrane proteins,Transport of small molecules	1284	uraA	44.2	1	1	0.02	0.02
95	PA4717	NP_253405	A0A8G3D3Z1	N/A	Q9HV81	Q9HV81_PSEAE	K07054	N/A	hypothetical protein PA4717 [Pseudomonas aeruginosa PAO1]	297	Hypothetical unclassified unknown	894	0	31.9	5	2	0.26	0.15
96	PA4755	NP_253443	A0A8G7BZD5	N/A	Q9HV46	GREA_PSEAE	K03624	N/A	transcription elongation factor GreA [Pseudomonas aeruginosa PAO1]	158	Transcription RNA processing and degradation	477	greA	17.2	1	1	0.09	0.09
97	PA4758	NP_253446	A0A8G2Z179	N/A	P38098	CARA_PSEAE	K01956	Pyrimidine metabolism;Alanine, aspartate and glutamate metabolism;Metabolic pathways;Biosynthesis of cofactors	carbamoyl phosphate synthase small subunit [Pseudomonas aeruginosa PAO1]	378	Amino acid biosynthesis and metabolism,Glutamate metabolism,Nucleotide biosynthesis and metabolism	1137	carA	40.8	1	1	0.04	0.03
98	PA4759	NP_253447	A0A072ZKT6	1.17.1.8	P38103	DAPB_PSEAE	K00215	Monobactam biosynthesis;Lysine biosynthesis;Metabolic pathways;Biosynthesis of secondary metabolites;Microbial metabolism in diverse environments;Biosynthesis of amino acids	4-hydroxy-tetrahydrodipicolinate reductase [Pseudomonas aeruginosa PAO1]	268	Amino acid biosynthesis and metabolism,Lysine biosynthesis	807	dapB	28.3	1	1	0.15	0.15
99	PA4811	NP_253499	A0A8G6H100	N/A	Q9HUZ8	Q9HUZ8_PSEAE	K00124	Glyoxylate and dicarboxylate metabolism;Methane metabolism;Metabolic pathways;Microbial metabolism in diverse environments;Carbon metabolism	nitrate-inducible formate dehydrogenase subunit beta [Pseudomonas aeruginosa PAO1]	309	Energy metabolism,Glyoxylate and dicarboxylate metabolism,Methane metabolism	930	fdnH	33.8	2	1	0.15	0.09
100	PA4839	NP_253526	A0A8G5TXC2	N/A	Q9HUX1	SPEA_PSEAE	K01585	Arginine and proline metabolism;Metabolic pathways;Biosynthesis of secondary metabolites	arginine decarboxylase [Pseudomonas aeruginosa PAO1]	636	Amino acid biosynthesis and metabolism,Arginine and proline metabolism,Glutamate metabolism	1911	speA	70.7	1	1	0.02	0.02
101	PA4915	NP_253602	A0A5E5R2C1	N/A	Q9HUP8	Q9HUP8_PSEAE	K03406	Two-component system	chemotaxis transducer [Pseudomonas aeruginosa PAO1]	541	Adaptation protection,Chemotactic transducer (MCP),Chemotaxis	1626	0	57.9	2	4	0.05	0.11
102	PA4920	NP_253607	A0A3S0L3S1	6.3.1.5	Q9HUP3	NADE_PSEAE	K01916	Nicotinate and nicotinamide metabolism;Metabolic pathways;Biosynthesis of cofactors	NAD synthetase [Pseudomonas aeruginosa PAO1]	275	Amino acid biosynthesis and metabolism,Biosynthesis of cofactors, prosthetic groups and carriers,Glutamate metabolism,Nicotinate and nicotinamide metabolism	828	nadE	29.7	2	3	0.18	0.27
103	PA4954	NP_253641	A0A0A8REI9	N/A	Q9HUL1	Q9HUL1_PSEAE	K02556	Two-component system	flagellar motor protein MotA [Pseudomonas aeruginosa PAO1]	283	Adaptation protection,Chemotaxis,Chemotaxis,Flagella Assembly	852	motA	30.1	2	3	0.11	0.17
104	PA4958	NP_253645	A0A0A8RI16	N/A	Q9HUK7	Q9HUK7_PSEAE	K23127	N/A	cyclic-di-GMP receptor FimW [Pseudomonas aeruginosa PAO1]	607	Hypothetical unclassified unknown	1823	fimW	67.8	1	1	0.03	0.05
105	PA5010	NP_253697	A0A3S3UNX1;A0A8G3W3D6	N/A	Q9HUF6	Q9HUF6_PSEAE	K02844	Lipopolysaccharide biosynthesis;Metabolic pathways	UDP-glucose:(heptosyl) LPS alpha 1,3-glucosyltransferase WaaG [Pseudomonas aeruginosa PAO1]	373	Cell wall LPS capsule,Lipopolysaccharide biosynthesis	1122	waaG	42.2	2	2	0.07	0.06
106	PA5012	NP_253699	A0A0H2ZHE9	N/A	G3XD35	G3XD35_PSEAE	K02843	Lipopolysaccharide biosynthesis;Metabolic pathways	heptosyltransferase II [Pseudomonas aeruginosa PAO1]	345	Cell wall LPS capsule,Lipopolysaccharide biosynthesis	1038	waaF	38.4	5	1	0.19	0.06
107	PA5027	NP_253714	A0A072ZK86;A0A8G1K6R0	N/A	Q9HUE2	Q9HUE2_PSEAE	N/A	N/A	hypothetical protein PA5027 [Pseudomonas aeruginosa PAO1]	271	Hypothetical unclassified unknown	816	0	29.8	22	12	1.31	0.66
108	PA5047	NP_253734	A0A069Q3I7	N/A	Q9HUD2	Q9HUD2_PSEAE	N/A	N/A	hypothetical protein PA5047 [Pseudomonas aeruginosa PAO1]	479	Hypothetical unclassified unknown	1440	0	52.4	2	5	0.06	0.21
109	PA5049	NP_253736	A0A072ZJG4	N/A	Q9HUD0	RL31_PSEAE	K02909	N/A	50S ribosomal protein L31 [Pseudomonas aeruginosa PAO1]	71	Translation post translation modification degradation	216	rpmE	7.9	4	3	1.03	0.92
110	PA5051	NP_253738	A0A232CZ52	6.1.1.19	Q9HUC8	SYR_PSEAE	K01887	N/A	arginine--tRNA ligase [Pseudomonas aeruginosa PAO1]	587	Aminoacyl-tRNA biosynthesis,Arginine and proline metabolism,Translation post translation modification degradation	1764	argS	65.2	1	1	0.01	0.01
111	PA5076	NP_253763	A0A4P0TI59	N/A	Q9HUA7	Q9HUA7_PSEAE	K02030	N/A	ABC transporter [Pseudomonas aeruginosa PAO1]	266	Transport of small molecules	801	0	29.7	1	2	0.06	0.16
112	PA5107	NP_253794	A0A5F1BLX3	N/A	Q9HU76	Q9HU76_PSEAE	K03098	N/A	outer membrane lipoprotein Blc [Pseudomonas aeruginosa PAO1]	189	Membrane proteins	570	blc	21.9	4	2	0.25	0.1
113	PA5161	NP_253848	A0A8G2P4K0	N/A	#N/A	#N/A	K01710	Streptomycin biosynthesis;Polyketide sugar unit biosynthesis;Acarbose and validamycin biosynthesis;O-Antigen nucleotide sugar biosynthesis;Metabolic pathways;Biosynthesis of secondary metabolites;Biosynthesis of nucleotide sugars	dTDP-D-glucose 4,6-dehydratase [Pseudomonas aeruginosa PAO1]	352	Lipopolysaccharide biosynthesis,Nucleotide sugars metabolism	#N/A	#N/A	#N/A	3	2	0.17	0.09
114	PA5166	NP_253853	A0A072ZUQ4	N/A	Q9HU19	Q9HU19_PSEAE	K10126	Two-component system	two-component response regulator [Pseudomonas aeruginosa PAO1]	462	Transcriptional regulators,Transport of small molecules,Two component regulatory systems,Two-component System	1389	dctD	50.9	3	5	0.1	0.16
115	PA5170	NP_253857	A0A072ZJ64;A0A8G3ILI0	N/A	P18275	ARCD_PSEAE	K03758	N/A	arginine/ornithine antiporter [Pseudomonas aeruginosa PAO1]	482	Amino acid biosynthesis and metabolism,Membrane proteins,Transport of small molecules	1449	arcD	52	5	7	0.12	0.17
116	PA5173	NP_253860	A0A069Q1G0;A0A8A4F592	N/A	P13982	ARCC_PSEAE	K00926	Arginine biosynthesis;Purine metabolism;Nitrogen metabolism;Metabolic pathways;Microbial metabolism in diverse environments;Carbon metabolism	carbamate kinase [Pseudomonas aeruginosa PAO1]	310	Amino acid biosynthesis and metabolism,Arginine and proline metabolism,Glutamate metabolism,Nitrogen metabolism	933	arcC	33.1	4	10	0.33	0.59
117	PA5192	NP_253879	A0A072ZJ52	4.1.1.49	Q9HTZ7	PCKA_PSEAE	K01610	Glycolysis / Gluconeogenesis;Citrate cycle (TCA cycle);Pyruvate metabolism;Carbon fixation in photosynthetic organisms;Metabolic pathways;Biosynthesis of secondary metabolites;Microbial metabolism in diverse environments;Carbon metabolism	phosphoenolpyruvate carboxykinase [Pseudomonas aeruginosa PAO1]	513	Carbon compound catabolism,Carbon fixation,Citrate cycle (TCA cycle),Energy metabolism,Pyruvate metabolism	1542	pckA	55.7	4	1	0.13	0.05
118	PA5200	NP_253887	A0A072ZUN0	N/A	Q9HTY9	Q9HTY9_PSEAE	K07659	Two-component system	osmolarity response regulator [Pseudomonas aeruginosa PAO1]	247	Antibiotic resistance and susceptibility,Transcriptional regulators,Two component regulatory systems,Two-component System	744	amgR	27.9	1	5	0.06	0.41
119	PA5208	NP_253895	A0A643J0B3	N/A	Q9HTY2	Q9HTY2_PSEAE	K07220	N/A	hypothetical protein PA5208 [Pseudomonas aeruginosa PAO1]	225	Hypothetical unclassified unknown	678	0	25.6	1	5	0.07	0.3
120	PA5215	NP_253902	A0A8G3UL52	N/A	Q9HTX5	GCST_PSEAE	K00605	Glycine, serine and threonine metabolism;Glyoxylate and dicarboxylate metabolism;One carbon pool by folate;Lipoic acid metabolism;Metabolic pathways;Biosynthesis of secondary metabolites;Carbon metabolism	glycine cleavage system aminomethyltransferase T [Pseudomonas aeruginosa PAO1]	360	Amino acid biosynthesis and metabolism,Central intermediary metabolism,Glycine, serine and threonine metabolism,Nitrogen metabolism,One carbon pool by folate	1083	gcvT1	38.9	1	1	Could Not Be Accurately Determined	Could Not Be Accurately Determined
121	PA5217	NP_253904	A0A6A9JZV1	N/A	Q9HTX3	P5217_PSEAE	K02012	N/A	iron ABC transporter substrate-binding protein [Pseudomonas aeruginosa PAO1]	332	Transport of small molecules	999	0	36.3	1	1	0.04	0.06
122	PA5252	NP_253939	A0A2R3IUV7	N/A	Q9HTU2	Q9HTU2_PSEAE	K06158	N/A	ABC transporter ATP-binding protein [Pseudomonas aeruginosa PAO1]	638	Transport of small molecules	1917	0	70.9	1	1	0.01	0.02
123	PA5373	NP_254060	A0A8G3NHL8;A0A8G6T6Z8	N/A	Q9HTJ1	BETB_PSEAE	K00130	Glycine, serine and threonine metabolism;Metabolic pathways	betaine aldehyde dehydrogenase [Pseudomonas aeruginosa PAO1]	490	Adaptation protection,Amino acid biosynthesis and metabolism,Glycine, serine and threonine metabolism	1473	betB	53.3	2	6	0.07	0.27
124	PA5475	NP_254162	A0A1C7BER4	N/A	Q9HT95	Q9HT95_PSEAE	N/A	N/A	hypothetical protein PA5475 [Pseudomonas aeruginosa PAO1]	186	Hypothetical unclassified unknown	561	0	21	1	1	0.11	0.12
125	PA5507	NP_254194	A0A0C7CX03	N/A	Q9HT66	Q9HT66_PSEAE	N/A	N/A	hypothetical protein PA5507 [Pseudomonas aeruginosa PAO1]	217	Hypothetical unclassified unknown	654	0	24.3	1	1	0.09	0.07
126	PA0306a	YP_008719731	A0A0A8RMP7;A0A3S3TRJ5	N/A	#N/A	#N/A	N/A	N/A	transcriptional regulator [Pseudomonas aeruginosa PAO1]	167	#N/A	#N/A	#N/A	#N/A	2	3	0.2	0.37
127	PA1483a	YP_008719744	A0A072ZL64	N/A	#N/A	#N/A	N/A	N/A	hypothetical protein PA1483a [Pseudomonas aeruginosa PAO1]	138	#N/A	#N/A	#N/A	#N/A	1	1	0.09	0.09

## Sheet: AUM_LB_log
Protein ID	Locus_Tag	## Accession	Provided_UniProt_Accessions	Enzyme_Classification_Number	UniProtKB Accession	UniProtKB ID	KEGG_Ortholog	Pathways	Annotation	Sequence_Length	Function	Gene Length	Gene Name	Estimated MW (kDa)	CumulativePartialPeptideSequences		AverageSequenceCoverage
															AUM_log	LB_log	AUM_log	LB_log
1	PA0045	NP_248735	A0A8G2YQD5	N/A	Q9I787	Q9I787_PSEAE	N/A	N/A	hypothetical protein PA0045 [Pseudomonas aeruginosa PAO1]	228	Hypothetical unclassified unknown	687	0	24.4	4	6	0.23	0.42
2	PA0082	NP_248772	A0A0H2ZK28	N/A	Q9I750	Q9I750_PSEAE	K11902	N/A	hypothetical protein PA0082 [Pseudomonas aeruginosa PAO1]	344	Hcp secretion island I (HSI-I) type VI secretion system,Protein secretion export apparatus	1035	tssA1	36.6	1	2	0.03	0.06
3	PA0378	NP_249069	A0A0A8R9R6	2.4.1.129	Q9I6B7	MTGA_PSEAE	K03814	Metabolic pathways	monofunctional biosynthetic peptidoglycan transglycosylase [Pseudomonas aeruginosa PAO1]	243	Cell wall LPS capsule,Peptideglycan biosynthesis	732	0	27.8	1	1	0.13	0.09
4	PA0455	NP_249146	A0A8G2PED4;A0A8G3A8F0	N/A	Q9I663	Q9I663_PSEAE	K05591	N/A	ATP-dependent RNA helicase DbpA [Pseudomonas aeruginosa PAO1]	458	Transcription RNA processing and degradation	1377	dbpA	49.8	1	1	Could Not Be Accurately Determined	Could Not Be Accurately Determined
5	PA0456	NP_249147	A0A0H2ZK92	N/A	Q9I662	Q9I662_PSEAE	K03704	N/A	cold-shock protein [Pseudomonas aeruginosa PAO1]	69	Adaptation protection,Transcriptional regulators	210	0	7.7	1	2	0.35	0.41
6	PA0625	NP_249316	A0A8G4HNG7;A0A8G6HI08	N/A	G3XD83	G3XD83_PSEAE	N/A	N/A	hypothetical protein PA0625 [Pseudomonas aeruginosa PAO1]	745	Related to phage, transposon, or plasmid	2238	0	77.6	1	2	0.02	0.05
7	PA1015	NP_249706	A0A8G8GVX7	N/A	Q9I4V8	Q9I4V8_PSEAE	N/A	N/A	transcriptional regulator [Pseudomonas aeruginosa PAO1]	266	Transcriptional regulators	801	0	28.9	1	1	0.05	0.07
8	PA1056	NP_249747	A0A0A8RMY3	N/A	Q9I4R8	Q9I4R8_PSEAE	K05561	N/A	monovalent cation/H+ antiporter subunit D [Pseudomonas aeruginosa PAO1]	499	Membrane proteins,Putative enzymes,Transport of small molecules	1500	shaC	52.3	1	1	0.03	0.03
9	PA1183	NP_249874	A0A0A8RP76	N/A	Q9I4F5	DCTA2_PSEAE	K11103	Two-component system	C4-dicarboxylate transport protein [Pseudomonas aeruginosa PAO1]	436	C(4)-dicarboxylate transport,C(4)-dicarboxylate transport,Transport of small molecules	1311	dctA	46	1	3	0.05	0.12
10	PA1228	NP_249919	A0A069QCR1	N/A	Q9I4B0	Q9I4B0_PSEAE	N/A	N/A	hypothetical protein PA1228 [Pseudomonas aeruginosa PAO1]	116	Hypothetical unclassified unknown	351	0	12.4	1	5	0.25	0.92
11	PA1423	NP_250114	A0A8G7AYQ6	N/A	Q9I3S1	BDLA_PSEAE	K03406	Two-component system	biofilm dispersion protein [Pseudomonas aeruginosa PAO1]	417	Cell wall LPS capsule,Chemotactic transducer (MCP),Chemotaxis,nutrient-induced dispersion	1254	bdlA	46.9	4	2	0.21	0.07
12	PA1526	NP_250217	A0A8G3XWP0	N/A	Q9I3I7	Q9I3I7_PSEAE	N/A	N/A	transcriptional regulator [Pseudomonas aeruginosa PAO1]	219	Transcriptional regulators	660	0	25.1	1	1	0.09	0.07
13	PA2233	NP_250923	A0A8G6USS6	N/A	Q9I1N6	Q9I1N6_PSEAE	K25205	N/A	biofilm formation protein PslC [Pseudomonas aeruginosa PAO1]	303	Cell wall LPS capsule,Psl exopolysaccharide biosynthesis,Putative enzymes	912	pslC	33.6	1	1	0.05	0.05
14	PA2237	NP_250927	A0A081HIB4	N/A	Q9I1N2	Q9I1N2_PSEAE	K21000	N/A	biofilm formation protein PslG [Pseudomonas aeruginosa PAO1]	442	Cell wall LPS capsule,Psl exopolysaccharide biosynthesis,Putative enzymes	1329	pslG	50.1	1	1	0.03	0.03
15	PA2382	NP_251072	A0A069PW73	N/A	Q9I197	Q9I197_PSEAE	K00101	Pyruvate metabolism;Metabolic pathways	L-lactate dehydrogenase [Pseudomonas aeruginosa PAO1]	383	Energy metabolism,Pyruvate metabolism	1152	lldA	42.1	4	7	0.19	0.27
16	PA2629	NP_251319	A0A444LU18	4.3.2.2	Q9I0K9	PUR8_PSEAE	K01756	Purine metabolism;Alanine, aspartate and glutamate metabolism;Metabolic pathways;Biosynthesis of secondary metabolites;Nucleotide metabolism;Biosynthesis of cofactors	adenylosuccinate lyase [Pseudomonas aeruginosa PAO1]	456	Alanine and Aspartate metabolism,Amino acid biosynthesis and metabolism,Nucleotide biosynthesis and metabolism,Purine metabolism	1371	purB	50.5	1	1	0.04	0.03
17	PA2653	NP_251343	A0A0A8RTI9	N/A	Q9I0I5	Q9I0I5_PSEAE	K07084	N/A	transporter [Pseudomonas aeruginosa PAO1]	441	Membrane proteins,Transport of small molecules	1326	0	46	1	1	0.04	0.05
18	PA2667	NP_251357	A0A069QAN5	N/A	Q9I0H1	Q9I0H1_PSEAE	N/A	N/A	hypothetical protein PA2667 [Pseudomonas aeruginosa PAO1]	117	Transcriptional regulators	354	mvaU	13.4	1	1	0.15	0.09
19	PA3146	NP_251836	A0A2V3FDK4	N/A	Q9HZ81	Q9HZ81_PSEAE	K24312	O-Antigen nucleotide sugar biosynthesis;Metabolic pathways;Biosynthesis of nucleotide sugars	NAD-dependent epimerase/dehydratase [Pseudomonas aeruginosa PAO1]	316	Cell wall LPS capsule,Lipopolysaccharide biosynthesis,Putative enzymes	951	wbpK	34	3	5	0.16	0.27
20	PA3238	NP_251928	A0A8G3X4T7	N/A	Q9HZ02	Q9HZ02_PSEAE	N/A	N/A	hypothetical protein PA3238 [Pseudomonas aeruginosa PAO1]	453	Hypothetical unclassified unknown	1362	0	51	1	1	0.04	0.04
21	PA3266	NP_251956	A0A069Q7R5;A0A8G7LAR5	N/A	P95459	CSPA_PSEAE	K03704	N/A	major cold shock protein CspA [Pseudomonas aeruginosa PAO1]	69	Adaptation protection,Transcriptional regulators	210	capB	7.6	1	4	0.26	0.81
22	PA3321	NP_252011	A0A2C9WYV9	N/A	Q9HYS4	Q9HYS4_PSEAE	N/A	N/A	transcriptional regulator [Pseudomonas aeruginosa PAO1]	304	Transcriptional regulators	915	0	34.1	2	2	0.07	0.1
23	PA3522	NP_252212	Q4LDT6	N/A	Q9HY87	Q9HY87_PSEAE	K19594	N/A	resistance-nodulation-cell division (RND) efflux transporter [Pseudomonas aeruginosa PAO1]	1053	Membrane proteins,Transport of small molecules	3162	mexQ	112.3	1	1	0.02	0.02
24	PA3552	NP_252242	A0A8G2PBQ6	N/A	Q9HY65	ARNB_PSEAE	K07806	Amino sugar and nucleotide sugar metabolism;Metabolic pathways;Biosynthesis of nucleotide sugars;Cationic antimicrobial peptide (CAMP) resistance;Two-component system	UDP-4-amino-4-deoxy-L-arabinose--oxoglutarate aminotransferase [Pseudomonas aeruginosa PAO1]	382	Adaptation protection,Antibiotic resistance and susceptibility,Cell wall LPS capsule	1149	arnB	41.9	3	1	0.13	0.05
25	PA3584	NP_252274	A0A8G4TNU2	N/A	P52111	GLPD_PSEAE	K00111	Glycerophospholipid metabolism;Biosynthesis of secondary metabolites	glycerol-3-phosphate dehydrogenase [Pseudomonas aeruginosa PAO1]	512	Central intermediary metabolism,Energy metabolism,Glycerolipid metabolism	1539	glpD	57.1	3	19	0.08	0.58
26	PA3949	NP_252638	A0A6B0QSE9	N/A	Q9HX67	Q9HX67_PSEAE	N/A	N/A	hypothetical protein PA3949 [Pseudomonas aeruginosa PAO1]	391	Hypothetical unclassified unknown	1176	0	42.4	1	2	0.03	0.05
27	PA3968	NP_252657	A0A7M2ZWR6	5.4.99.-	Q9HX48	RLUE_PSEAE	K06181	N/A	pseudouridine synthase [Pseudomonas aeruginosa PAO1]	189	Putative enzymes	570	0	21.5	1	1	0.08	0.06
28	PA4000	NP_252689	A0A0A8RDC6;A0A8G4DGN1	4.2.2.-	Q9X6V6	RLPA_PSEAE	K03642	N/A	hypothetical protein PA4000 [Pseudomonas aeruginosa PAO1]	342	Cell division	1029	rlpA	36.5	3	2	0.16	0.04
29	PA4115	NP_252804	A0A0A8RDH6	3.2.2.4	Q9HWR5	Q9HWR5_PSEAE	K06966	Purine metabolism;Pyrimidine metabolism;Metabolic pathways;Nucleotide metabolism	hypothetical protein PA4115 [Pseudomonas aeruginosa PAO1]	461	Hypothetical unclassified unknown	1386	0	51.1	1	2	0.05	0.06
30	PA4275	NP_252965	A0A0A8RD88	N/A	Q9HWC4	NUSG_PSEAE	K02601	N/A	transcription antitermination protein NusG [Pseudomonas aeruginosa PAO1]	177	Transcription RNA processing and degradation	534	nusG	20.1	2	3	0.19	0.29
31	PA4418	NP_253108	A0A2R3J498	3.4.16.4	G3XD46	G3XD46_PSEAE	K03587	Metabolic pathways;beta-Lactam resistance	penicillin-binding protein 3 [Pseudomonas aeruginosa PAO1]	579	Cell division,Cell wall LPS capsule,Peptideglycan biosynthesis	1740	ftsI	62.9	3	6	0.12	0.16
32	PA4419	NP_253109	A0A069Q779	N/A	Q9HVZ6	FTSL_PSEAE	K03586	N/A	cell division protein FtsL [Pseudomonas aeruginosa PAO1]	97	Cell division	294	ftsL	11.1	1	2	0.1	0.24
33	PA4541	NP_253231	A0A8G2RWK4	N/A	Q9HVN6	Q9HVN6_PSEAE	K14232	N/A	hypothetical protein PA4541 [Pseudomonas aeruginosa PAO1]	1417	Membrane proteins,Secreted factors (toxins, enzymes, alginate)	4254	lepA	140	1	1	0.01	0.01
34	PA4601	NP_253291	A0A431X201;A0A8G6FPX5	N/A	Q9HVI8	Q9HVI8_PSEAE	N/A	N/A	motility regulator [Pseudomonas aeruginosa PAO1]	1415	Membrane proteins	4248	morA	159.6	1	2	0	0.03
35	PA4686	NP_253375	A0A8G3ZZG2	N/A	Q9HVA9	Q9HVA9_PSEAE	N/A	N/A	hypothetical protein PA4686 [Pseudomonas aeruginosa PAO1]	948	Hypothetical unclassified unknown	2847	0	106.8	1	1	0.03	0.01
36	PA4723	NP_253411	A0A8G2V8Q8	N/A	G3XD14	G3XD14_PSEAE	K06204	N/A	suppressor protein DksA [Pseudomonas aeruginosa PAO1]	148	Adaptation protection,DNA replication recombination modification and repair,Transcriptional regulators	447	0	17.3	1	1	0.11	0.08
37	PA4770	NP_253458	A0A080VT44	N/A	Q9HV38	Q9HV38_PSEAE	K03303	N/A	L-lactate permease [Pseudomonas aeruginosa PAO1]	562	Transport of small molecules	1689	lldP	58.7	1	2	0.03	0.05
38	PA4808	NP_253496	A0A8A9A816	N/A	Q9HV01	SELA_PSEAE	K01042	Metabolic pathways	selenocysteine synthase [Pseudomonas aeruginosa PAO1]	468	Selenoamino acid metabolism,Translation post translation modification degradation	1407	selA	50.3	2	1	0.06	0.04
39	PA4947	NP_253634	A0A8G4TA55	N/A	Q9HUL7	Q9HUL7_PSEAE	K01448	Cationic antimicrobial peptide (CAMP) resistance	N-acetylmuramoyl-L-alanine amidase [Pseudomonas aeruginosa PAO1]	475	Cell wall LPS capsule	1428	amiB	50.7	1	2	0.04	0.06
40	PA4964	NP_253651	A0A0H2ZL55	5.6.2.2	Q9HUK1	PARC_PSEAE	K02621	N/A	DNA topoisomerase IV subunit A [Pseudomonas aeruginosa PAO1]	754	DNA replication recombination modification and repair	2265	parC	83.4	2	2	0.05	0.04
41	PA5000	NP_253687	A0A077JZV8	N/A	Q9HUG5	Q9HUG5_PSEAE	K12988	N/A	alpha-1,3-rhamnosyltransferase WapR [Pseudomonas aeruginosa PAO1]	294	Cell wall LPS capsule,Putative enzymes	885	wapR	33.6	1	3	0.04	0.15
42	PA5194	NP_253881	A0A8B4ZLF5	N/A	Q9HTZ5	Q9HTZ5_PSEAE	N/A	N/A	hypothetical protein PA5194 [Pseudomonas aeruginosa PAO1]	267	Membrane proteins	804	0	30.5	2	4	0.08	0.2
43	PA5201	NP_253888	A0A8G7FXB2	N/A	Q9HTY8	Q9HTY8_PSEAE	K06959	N/A	hypothetical protein PA5201 [Pseudomonas aeruginosa PAO1]	779	Hypothetical unclassified unknown	2340	0	85	1	5	0.03	0.09
44	PA5296	NP_253983	A0A8G7B6I0;B3G1U9	5.6.2.4	Q9HTQ8	Q9HTQ8_PSEAE	K03656	N/A	ATP-dependent DNA helicase Rep [Pseudomonas aeruginosa PAO1]	669	DNA replication recombination modification and repair	2010	rep	77	1	2	0.02	0.02

## Sheet: AUM_LB_sta
Protein ID	Locus_Tag	## Accession	Provided_UniProt_Accessions	Enzyme_Classification_Number	UniProtKB Accession	UniProtKB ID	KEGG_Ortholog	Pathways	Annotation	Sequence_Length	Function	Gene Length	Gene Name	Estimated MW (kDa)	CumulativePartialPeptideSequences		AverageSequenceCoverage
															AUM_sta	LB_sta	AUM_sta	LB_sta
1	PA0173	NP_248863	A0A8G3QMN8	N/A	Q9I6V9	CHEB2_PSEAE	K03412	Two-component system	chemotaxis response regulator protein-glutamate methylesterase [Pseudomonas aeruginosa PAO1]	349	Adaptation protection,Chemotactic transducer (MCP),Chemotaxis,Chemotaxis	1050	0	37.3	1	1	Could Not Be Accurately Determined	0.01
2	PA0400	NP_249091	A0A8G5WPR6	N/A	Q9I6A0	Q9I6A0_PSEAE	K01758	Glycine, serine and threonine metabolism;Cysteine and methionine metabolism;Metabolic pathways;Biosynthesis of secondary metabolites;Biosynthesis of amino acids	cystathionine gamma-lyase [Pseudomonas aeruginosa PAO1]	394	Amino acid biosynthesis and metabolism,Cysteine metabolism,Glycine, serine and threonine metabolism,Methionine metabolism,Nitrogen metabolism,Selenoamino acid metabolism,Sulfur metabolism	1185	0	42.8	2	2	0.09	0.09
3	PA0419	NP_249110	A0A0C7D2W3	2.1.1.193	Q9I694	Q9I694_PSEAE	K09761	N/A	16S ribosomal RNA methyltransferase RsmE [Pseudomonas aeruginosa PAO1]	240	Hypothetical unclassified unknown	723	0	26.5	1	1	0.1	0.1
4	PA0470	NP_249161	A0A8G7N9G1	N/A	Q9I648	Q9I648_PSEAE	K02014	N/A	ferrichrome receptor FiuA [Pseudomonas aeruginosa PAO1]	802	Membrane proteins,Transport of small molecules	2409	fiuA	88.2	1	1	0.02	0.02
5	PA0482	NP_249173	A0A6A9K126	2.3.3.9	Q9I636	MASZ_PSEAE	K01638	Pyruvate metabolism;Glyoxylate and dicarboxylate metabolism;Metabolic pathways;Biosynthesis of secondary metabolites;Microbial metabolism in diverse environments;Carbon metabolism	malate synthase G [Pseudomonas aeruginosa PAO1]	725	Carbon compound catabolism,Central intermediary metabolism,Glyoxylate and dicarboxylate metabolism,Pyruvate metabolism	2178	glcB	78.7	2	2	0.07	0.05
6	PA0555	NP_249246	A0A072ZR24	4.1.2.13	Q9I5Y1	ALF_PSEAE	K01624	Glycolysis / Gluconeogenesis;Pentose phosphate pathway;Fructose and mannose metabolism;Methane metabolism;Carbon fixation in photosynthetic organisms;Metabolic pathways;Biosynthesis of secondary metabolites;Microbial metabolism in diverse environments;Carbon metabolism;Biosynthesis of amino acids	fructose-1,6-bisphosphate aldolase [Pseudomonas aeruginosa PAO1]	354	Carbon compound catabolism,Carbon fixation,Central intermediary metabolism,Fructose and mannose metabolism,Glycolysis / Gluconeogenesis,Pentose phosphate cycle	1065	fda	38.6	1	2	0.03	0.1
7	PA0745	NP_249436	A0A8G3ADH5	N/A	Q9I5I4	Q9I5I4_PSEAE	N/A	N/A	enoyl-CoA hydratase [Pseudomonas aeruginosa PAO1]	272	Putative enzymes	819	dspI	29.9	2	2	0.15	0.09
8	PA0847	NP_249538	A0A6A9JTN3	N/A	Q9I594	Q9I594_PSEAE	N/A	N/A	hypothetical protein PA0847 [Pseudomonas aeruginosa PAO1]	735	Motility	2208	0	82.6	1	1	0.03	0.03
9	PA0931	NP_249622	A0A8G5JI77	N/A	Q9I527	Q9I527_PSEAE	K19611	Two-component system	outer membrane receptor FepA [Pseudomonas aeruginosa PAO1]	742	Transport of small molecules	2229	pirA	80.9	5	2	0.11	0.05
10	PA1323	NP_250014	A0A072ZIJ2;A0A8G5QPR5	N/A	Q9I421	Q9I421_PSEAE	N/A	N/A	hypothetical protein PA1323 [Pseudomonas aeruginosa PAO1]	110	Hypothetical unclassified unknown	333	0	11.6	11	3	2.17	0.66
11	PA1342	NP_250033	A0A072ZJ91;V6AQ13	N/A	Q9I402	Q9I402_PSEAE	K10001	Two-component system	ABC transporter [Pseudomonas aeruginosa PAO1]	302	Amino acid biosynthesis and metabolism,Transport of small molecules	909	aatJ	33.1	1	3	Could Not Be Accurately Determined	0.2
12	PA1624	NP_250315	A0A0A8RPI5	N/A	Q9I398	Q9I398_PSEAE	N/A	N/A	hypothetical protein PA1624 [Pseudomonas aeruginosa PAO1]	268	Hypothetical unclassified unknown	807	0	29.5	2	2	0.12	0.15
13	PA1753	NP_250444	A0A072ZHV7	N/A	Q9I2Y4	Q9I2Y4_PSEAE	N/A	N/A	hypothetical protein PA1753 [Pseudomonas aeruginosa PAO1]	165	Hypothetical unclassified unknown	498	0	18.4	1	1	0.11	0.11
14	PA1814	NP_250505	A0A069PZP2	N/A	Q9I2T0	Q9I2T0_PSEAE	N/A	N/A	hypothetical protein PA1814 [Pseudomonas aeruginosa PAO1]	253	Hypothetical unclassified unknown	762	kerV	28.4	1	1	0.16	0.07
15	PA1819	NP_250510	A0A8G3YU52	N/A	Q9I2S6	Q9I2S6_PSEAE	K03294	N/A	amino acid permease [Pseudomonas aeruginosa PAO1]	451	Membrane proteins,Transport of small molecules	1356	0	47.8	1	1	0.03	0.03
16	PA1821	NP_250512	A0A072ZHP9	N/A	Q9I2S4	Q9I2S4_PSEAE	K01692	Fatty acid degradation;Valine, leucine and isoleucine degradation;Lysine degradation;Phenylalanine metabolism;Benzoate degradation;Tryptophan metabolism;beta-Alanine metabolism;Aminobenzoate degradation;Propanoate metabolism;Butanoate metabolism;Metabolic pathways;Biosynthesis of secondary metabolites;Microbial metabolism in diverse environments;Fatty acid metabolism	enoyl-CoA hydratase [Pseudomonas aeruginosa PAO1]	270	Putative enzymes	813	0	30	1	1	0.06	0.06
17	PA1857	NP_250548	A0A2R3IXC3;A0A8G3I8E8	N/A	Q9I2N8	Q9I2N8_PSEAE	K09781	N/A	hypothetical protein PA1857 [Pseudomonas aeruginosa PAO1]	307	Membrane proteins	924	0	31.6	3	2	0.23	0.13
18	PA1860	NP_250551	A0A077JWS0	N/A	Q9I2N5	Q9I2N5_PSEAE	N/A	N/A	hypothetical protein PA1860 [Pseudomonas aeruginosa PAO1]	275	Putative enzymes	828	0	32	1	5	0.06	0.3
19	PA1888	NP_250579	A0A8G6VFU5	N/A	Q9I2K9	Q9I2K9_PSEAE	N/A	N/A	hypothetical protein PA1888 [Pseudomonas aeruginosa PAO1]	469	Hypothetical unclassified unknown	1410	0	52.3	1	2	0.02	0.07
20	PA2151	NP_250841	A0A8G2SPE0	N/A	Q9I1W4	GLGE_PSEAE	K16147	Starch and sucrose metabolism;Metabolic pathways	alpha-1,4-glucan:maltose-1-phosphate maltosyltransferase [Pseudomonas aeruginosa PAO1]	664	Hypothetical unclassified unknown	1995	0	76.3	2	1	0.03	0.02
21	PA2162	NP_250852	A0A485HQE8;A0A8G4CQJ0	N/A	Q9I1V3	Q9I1V3_PSEAE	K06044	Starch and sucrose metabolism;Metabolic pathways;Biosynthesis of secondary metabolites	malto-oligosyltrehalose synthase [Pseudomonas aeruginosa PAO1]	926	Putative enzymes	2781	0	103.7	2	1	Could Not Be Accurately Determined	0.01
22	PA2240	NP_250930	A0A071L7E5	N/A	Q9I1M9	Q9I1M9_PSEAE	K21003	N/A	biofilm formation protein PslJ [Pseudomonas aeruginosa PAO1]	478	Cell wall LPS capsule,Psl exopolysaccharide biosynthesis	1437	pslJ	52.5	2	1	0.04	0.02
23	PA2466	NP_251156	A0A8G5PY29	N/A	Q9I116	Q9I116_PSEAE	K02014	N/A	ferrioxamine receptor FoxA [Pseudomonas aeruginosa PAO1]	820	Transport of small molecules	2463	foxA	90	3	1	0.08	0.04
24	PA2708	NP_251398	A0A0A8RTA8	N/A	Q9I0D4	Q9I0D4_PSEAE	N/A	N/A	hypothetical protein PA2708 [Pseudomonas aeruginosa PAO1]	361	Hypothetical unclassified unknown	1086	0	40.2	3	1	0.08	0.03
25	PA2751	NP_251441	A0A0A8RDR1;A0A8G6D6P7	N/A	Q9I092	Q9I092_PSEAE	K07058	N/A	hypothetical protein PA2751 [Pseudomonas aeruginosa PAO1]	299	Membrane proteins	900	0	33.4	6	3	0.21	0.1
26	PA2756	NP_251446	A0A0A8RHC8	N/A	Q9I087	Q9I087_PSEAE	N/A	N/A	hypothetical protein PA2756 [Pseudomonas aeruginosa PAO1]	144	Hypothetical unclassified unknown	435	0	15.8	1	2	0.08	0.17
27	PA2877	NP_251567	A0A8G4MRY5;A0A8I0ZRT0	N/A	Q9HZX0	Q9HZX0_PSEAE	N/A	N/A	transcriptional regulator [Pseudomonas aeruginosa PAO1]	297	Transcriptional regulators	894	0	33.7	1	4	0.04	0.25
28	PA3038	NP_251728	A0A069QDK5	N/A	Q9HZH0	Q9HZH0_PSEAE	N/A	N/A	porin [Pseudomonas aeruginosa PAO1]	421	Transport of small molecules	1266	opdQ	46.7	2	2	0.07	0.1
29	PA3080	NP_251770	A0A509JNU7;A0A8G3B6N1	N/A	Q9HZC8	Q9HZC8_PSEAE	N/A	N/A	hypothetical protein PA3080 [Pseudomonas aeruginosa PAO1]	365	Hypothetical unclassified unknown	1098	0	38.5	1	1	0.03	Could Not Be Accurately Determined
30	PA3234	NP_251924	A0A073A4E8	N/A	Q9HZ06	Q9HZ06_PSEAE	K14393	N/A	acetate permease [Pseudomonas aeruginosa PAO1]	551	Membrane proteins,Transport of small molecules	1656	0	58.7	3	2	0.05	0.03
31	PA3235	NP_251925	A0A069Q9K4	N/A	Q9HZ05	Q9HZ05_PSEAE	N/A	N/A	hypothetical protein PA3235 [Pseudomonas aeruginosa PAO1]	103	Membrane proteins	312	0	11.7	1	2	0.14	0.28
32	PA3271	NP_251961	A0A8G4J9T7;A0A8G4P2K2;A0A8G6J6H9	N/A	Q9HYX0	Q9HYX0_PSEAE	N/A	N/A	two-component sensor [Pseudomonas aeruginosa PAO1]	1159	Two component regulatory systems,Two-component System	3480	0	127.5	2	13	0.03	0.14
33	PA3417	NP_252107	A0A8G2S4J4;A0A8G7S850	N/A	Q9HYI8	Q9HYI8_PSEAE	K00166	Valine, leucine and isoleucine degradation;Propanoate metabolism;Lipoic acid metabolism;Metabolic pathways;Biosynthesis of secondary metabolites	pyruvate dehydrogenase E1 component subunit alpha [Pseudomonas aeruginosa PAO1]	365	Energy metabolism	1098	0	40.4	5	1	0.29	0.06
34	PA3525	NP_252215	A0A071KY67	6.3.4.5	Q9HY84	ASSY_PSEAE	K01940	Arginine biosynthesis;Alanine, aspartate and glutamate metabolism;Metabolic pathways;Biosynthesis of secondary metabolites;Biosynthesis of amino acids	argininosuccinate synthase [Pseudomonas aeruginosa PAO1]	405	Alanine and Aspartate metabolism,Amino acid biosynthesis and metabolism,Arginine and proline metabolism,Urea cycle and metabolism of amino groups	1218	argG	45.3	1	3	0.06	0.2
35	PA3563	NP_252253	A0A8G7FAX2	N/A	Q9HY54	Q9HY54_PSEAE	K03435	N/A	FruR family transcriptional regulator [Pseudomonas aeruginosa PAO1]	329	Carbon compound catabolism,Transcriptional regulators,Transport of small molecules	990	fruR	36.4	2	1	0.09	0.05
36	PA3709	NP_252398	A0A0C7ALL8	N/A	Q9HXT2	Q9HXT2_PSEAE	N/A	N/A	major facilitator superfamily transporter [Pseudomonas aeruginosa PAO1]	539	Membrane proteins,Transport of small molecules	1620	0	58.4	1	1	0.04	0.04
37	PA3792	NP_252481	A0A8G2S837	N/A	Q9HXK5	LEU1_PSEAE	K01649	Valine, leucine and isoleucine biosynthesis;Pyruvate metabolism;Metabolic pathways;Biosynthesis of secondary metabolites;2-Oxocarboxylic acid metabolism;Biosynthesis of amino acids	2-isopropylmalate synthase [Pseudomonas aeruginosa PAO1]	592	Amino acid biosynthesis and metabolism,Valine, leucine and isoleucine biosynthesis	1779	leuA	65.8	1	2	0.04	0.08
38	PA3834	NP_252523	A0A2R3IQ98	6.1.1.9	Q9HXH0	SYV_PSEAE	K01873	N/A	valine--tRNA ligase [Pseudomonas aeruginosa PAO1]	950	Amino acid biosynthesis and metabolism,Aminoacyl-tRNA biosynthesis,Translation post translation modification degradation,Valine, leucine and isoleucine biosynthesis	2853	valS	107.7	1	4	0.02	0.07
39	PA3851	NP_252540	A0A080VSQ2;A0A0H2ZE70	N/A	Q9HXF5	Q9HXF5_PSEAE	K22736	N/A	hypothetical protein PA3851 [Pseudomonas aeruginosa PAO1]	250	Hypothetical unclassified unknown	753	0	25.7	1	1	0.07	0.07
40	PA3890	NP_252579	A0A069Q3A0	N/A	Q9HXC3	Q9HXC3_PSEAE	K05846	N/A	ABC transporter permease [Pseudomonas aeruginosa PAO1]	220	Membrane proteins,Transport of small molecules	663	opuCB	23.2	1	1	0.07	0.06
41	PA3972	NP_252661	A0A8G4YC24	N/A	Q9HX44	Q9HX44_PSEAE	K09456	N/A	acyl-CoA dehydrogenase [Pseudomonas aeruginosa PAO1]	549	Putative enzymes	1650	0	60.3	1	2	0.04	0.07
42	PA3985	NP_252674	A0A069Q532	N/A	Q9HX35	Q9HX35_PSEAE	N/A	N/A	hypothetical protein PA3985 [Pseudomonas aeruginosa PAO1]	253	Hypothetical unclassified unknown	762	0	28.3	1	1	0.08	0.06
43	PA4221	NP_252911	A0A0C7AUA3;A0A2R3J216;A0A8F9JTP1	N/A	P42512	FPTA_PSEAE	K16088	N/A	Fe(III)-pyochelin outer membrane receptor [Pseudomonas aeruginosa PAO1]	720	Transport of small molecules	2163	fptA	80	6	78	0.15	2.01
44	PA4222	NP_252912	A0A0A8RDG0;A0A8G5LKE6	N/A	Q9HWG7	Q9HWG7_PSEAE	K06147	N/A	ABC transporter ATP-binding protein [Pseudomonas aeruginosa PAO1]	574	Transport of small molecules	1725	0	61.4	1	36	0.02	0.82
45	PA4366	NP_253056	A0A072ZEC2	1.15.1.1	P53641	SODF_PSEAE	K04564	N/A	superoxide dismutase [Pseudomonas aeruginosa PAO1]	193	Adaptation protection	582	sodB	21.4	1	3	0.08	0.32
46	PA4501	NP_253191	A0A2R3J3B2;A0A7L5EU55	N/A	Q9HVS0	Q9HVS0_PSEAE	N/A	N/A	glycine-glutamate dipeptide porin OpdP [Pseudomonas aeruginosa PAO1]	484	Membrane proteins,Transport of small molecules	1455	0	53	11	2	0.4	0.06
47	PA4550	NP_253240	A0A1C7BF47	N/A	G3XCZ0	G3XCZ0_PSEAE	K08085	N/A	type 4 fimbrial biogenesis protein FimU [Pseudomonas aeruginosa PAO1]	168	Motility,Pilin biosynthesis	507	fimU	18.1	2	4	0.19	0.41
48	PA4656	NP_253345	A0A8G4DAI2	N/A	Q9HVD6	Q9HVD6_PSEAE	K07071	N/A	hypothetical protein PA4656 [Pseudomonas aeruginosa PAO1]	305	Hypothetical unclassified unknown	918	0	33.9	3	2	0.12	0.08
49	PA5094	NP_253781	A0A8G4FT37	N/A	Q9HU89	Q9HU89_PSEAE	K02000	N/A	ABC transporter ATP-binding protein [Pseudomonas aeruginosa PAO1]	276	Transport of small molecules	831	0	30.7	2	3	0.08	0.12
50	PA5124	NP_253811	A0A069Q394	2.7.13.3	Q9HU60	Q9HU60_PSEAE	K07708	Two-component system	two-component sensor NtrB [Pseudomonas aeruginosa PAO1]	358	Two component regulatory systems,Two-component System	1077	ntrB	39.9	1	3	0.06	0.15
51	PA5261	NP_253948	A0A072ZIW1	N/A	P26275	ALGR_PSEAE	K08083	Two-component system	alginate biosynthesis regulatory protein AlgR [Pseudomonas aeruginosa PAO1]	248	Alginate biosynthesis,Secreted factors (toxins, enzymes, alginate),Transcriptional regulators,Two component regulatory systems,Two-component System	747	algR	27.6	1	6	0.09	0.38
52	PA5361	NP_254048	A0A8G6REI9	N/A	P23621	PHOR_PSEAE	K07636	Two-component system	two-component sensor PhoR [Pseudomonas aeruginosa PAO1]	443	Two component regulatory systems,Two-component System	1332	phoR	50.1	1	2	0.06	0.04
53	PA5546	NP_254233	A0A0C6FLI5	N/A	Q9HT28	Q9HT28_PSEAE	K00574	N/A	hypothetical protein PA5546 [Pseudomonas aeruginosa PAO1]	394	Putative enzymes	1185	0	44.1	1	4	0.03	0.15
54	PA0457.1	YP_003933608	A0A6A9K9A2	N/A	B5WWL1	B5WWL1_PSEAE	N/A	N/A	hypothetical protein PA0457.1 [Pseudomonas aeruginosa PAO1]	124	Hypothetical unclassified unknown	375	0	14.3	3	1	Could Not Be Accurately Determined	Could Not Be Accurately Determined

## Sheet: AUM_log_LB_sta
Protein ID	Locus_Tag	## Accession	Provided_UniProt_Accessions	Enzyme_Classification_Number	UniProtKB Accession	UniProtKB ID	KEGG_Ortholog	Pathways	Annotation	Sequence_Length	Function	Gene Length	Gene Name	Estimated MW (kDa)	CumulativePartialPeptideSequences		AverageSequenceCoverage
															AUM_log	LB_sta	AUM_log	LB_sta
1	PA0102	NP_248792	A0A072ZH59	4.2.1.1	Q9I730	Q9I730_PSEAE	K01673	Nitrogen metabolism;Metabolic pathways	carbonic anhydrase [Pseudomonas aeruginosa PAO1]	242	Adaptation protection,Central intermediary metabolism	729	psCA1	26.6	2	1	0.21	0.07
2	PA0195	NP_248885	A0A8F8R7Y9	N/A	Q14T74	Q14T74_PSEAE	K00324	Nicotinate and nicotinamide metabolism;Metabolic pathways	NAD(P) transhydrogenase subunit alpha [Pseudomonas aeruginosa PAO1]	372	Energy metabolism,Transport of small molecules	1117	pntAA	38.6	2	1	0.08	0.03
3	PA0708	NP_249399	A0A0A8RMJ7	N/A	Q9I5M0	Q9I5M0_PSEAE	N/A	N/A	transcriptional regulator [Pseudomonas aeruginosa PAO1]	284	Transcriptional regulators	855	0	31.5	1	1	0.05	0.05
4	PA0716	NP_249407	A0A5E5QYB3;Q9I5L2	N/A	Q9I5L2	Q9I5L2_PSEAE	N/A	N/A	hypothetical protein PA0716 [Pseudomonas aeruginosa PAO1]	441	Hypothetical unclassified unknown	1326	0	49.9	1	1	0.05	Could Not Be Accurately Determined
5	PA0846	NP_249537	A0A509J8C7	N/A	Q9I595	CYSZ_PSEAE	K06203	N/A	sulfate transporter CysZ [Pseudomonas aeruginosa PAO1]	246	Transport of small molecules	741	0	28	1	1	0.04	0.04
6	PA0858	NP_249549	A0A8G7HM69	N/A	Q9I583	Y858_PSEAE	K07146	N/A	hypothetical protein PA0858 [Pseudomonas aeruginosa PAO1]	312	Hypothetical unclassified unknown	939	0	35.4	4	1	0.21	0.03
7	PA1459	NP_250150	A0A069Q654	3.1.1.61	O87125	CHEB1_PSEAE	K03412	Two-component system	chemotaxis-specific methylesterase [Pseudomonas aeruginosa PAO1]	368	Chemotaxis,Chemotaxis	1107	0	39	1	1	0.04	0.05
8	PA1462	NP_250153	A0A8G3B8I8	N/A	G3XCW7	G3XCW7_PSEAE	K03496	N/A	plasmid partitioning protein [Pseudomonas aeruginosa PAO1]	262	Cell division	789	0	28.4	2	1	0.14	0.08
9	PA1504	NP_250195	A0A8G2V1Q4	N/A	Q9I3K8	Q9I3K8_PSEAE	K09017	N/A	transcriptional regulator [Pseudomonas aeruginosa PAO1]	216	Transcriptional regulators	651	0	24.2	1	1	0.08	0.08
10	PA1544	NP_250235	A0A0A8RPD3	N/A	P23926	ANR_PSEAE	K01420	N/A	transcriptional regulator Anr [Pseudomonas aeruginosa PAO1]	244	Transcriptional regulators	735	anr	27.1	1	1	0.05	0.07
11	PA1640	NP_250331	A0A367M138	N/A	Q9I385	Q9I385_PSEAE	K07001	N/A	hypothetical protein PA1640 [Pseudomonas aeruginosa PAO1]	345	Hypothetical unclassified unknown	1038	0	37.6	1	1	0.04	0.04
12	PA1698	NP_250389	A0A8G2NJL8	N/A	G3XCX6	G3XCX6_PSEAE	K04058	N/A	type III secretion outer membrane protein PopN [Pseudomonas aeruginosa PAO1]	288	Membrane proteins,Protein secretion export apparatus,Type III Secretion	867	popN	31.3	1	1	0.04	0.04
13	PA1738	NP_250429	Q9I2Z9	N/A	Q9I2Z9	Q9I2Z9_PSEAE	N/A	N/A	transcriptional regulator [Pseudomonas aeruginosa PAO1]	304	Transcriptional regulators	915	0	33.2	2	1	0.1	0.05
14	PA1750	NP_250441	A0A8G6XN90	N/A	Q9I2Y7	Q9I2Y7_PSEAE	K01626	Phenylalanine, tyrosine and tryptophan biosynthesis;Metabolic pathways;Biosynthesis of secondary metabolites;Biosynthesis of amino acids	phospho-2-dehydro-3-deoxyheptonate aldolase [Pseudomonas aeruginosa PAO1]	358	Amino acid biosynthesis and metabolism,Phenylalanine, tyrosine and tryptophan biosynthesis	1077	0	39.1	1	1	0.07	0.06
15	PA1788	NP_250479	A0A8E5UVX9	N/A	Q9I2V4	Q9I2V4_PSEAE	K06938	N/A	hypothetical protein PA1788 [Pseudomonas aeruginosa PAO1]	155	Hypothetical unclassified unknown	468	0	18.2	3	1	0.33	0.11
16	PA2138	NP_250828	A0A2R3IMF4	6.5.1.1	Q9I1X7	LIGD_PSEAE	K01971	N/A	multifunctional non-homologous end joining protein LigD [Pseudomonas aeruginosa PAO1]	840	DNA replication recombination modification and repair	2523	ligD	94	1	1	0.01	0.01
17	PA2236	NP_250926	A0A072ZMM7;A0A8G3W1K0	N/A	Q9I1N3	Q9I1N3_PSEAE	K20999	N/A	biofilm formation protein PslF [Pseudomonas aeruginosa PAO1]	395	Cell wall LPS capsule,Psl exopolysaccharide biosynthesis	1188	pslF	42.7	12	7	0.68	0.37
18	PA2271	NP_250961	A0A8G6D7D1	N/A	Q9I1K2	Q9I1K2_PSEAE	N/A	N/A	acetyltransferase [Pseudomonas aeruginosa PAO1]	171	Putative enzymes	516	0	19.2	2	1	0.23	0.11
19	PA2329	NP_251019	A0A8G2PZN1	N/A	Q9I1E9	Q9I1E9_PSEAE	K02049	N/A	ABC transporter ATP-binding protein [Pseudomonas aeruginosa PAO1]	278	Transport of small molecules	837	0	29.9	2	5	0.13	0.27
20	PA2400	NP_251090	A0A844NP42;A0A8G2QD15;A0A8G3VC78;A0A8G6VXW2;A0A8G7IVR1	N/A	Q9I181	Q9I181_PSEAE	N/A	N/A	pyoverdine biosynthesis protein PvdJ [Pseudomonas aeruginosa PAO1]	2157	Adaptation protection	6474	pvdJ	240.2	143	5	1.23	0.05
21	PA2411	NP_251101	A0A8G3SR21	N/A	Q9I170	Q9I170_PSEAE	N/A	N/A	thioesterase [Pseudomonas aeruginosa PAO1]	254	Adaptation protection,Putative enzymes	765	0	27.8	3	1	0.2	0.07
22	PA2467	NP_251157	A0A8G2UPW4	N/A	Q9I115	Q9I115_PSEAE	K07165	Two-component system	anti-sigma factor FoxR [Pseudomonas aeruginosa PAO1]	328	Membrane proteins,Transcriptional regulators	987	foxR	36.4	2	1	0.12	0.06
23	PA2551	NP_251241	A0A072ZQR6	N/A	Q9I0T3	Q9I0T3_PSEAE	N/A	N/A	transcriptional regulator [Pseudomonas aeruginosa PAO1]	310	Transcriptional regulators	933	0	35.1	2	1	0.08	0.06
24	PA2660	NP_251350	A0A3M5EAU2;A0A3S0IY11	N/A	Q9I0H8	Q9I0H8_PSEAE	N/A	N/A	hypothetical protein PA2660 [Pseudomonas aeruginosa PAO1]	360	Hypothetical unclassified unknown	1083	0	39.8	5	4	0.18	0.07
25	PA2732	NP_251422	A0A8B5A3R7	N/A	Q9I0B0	Q9I0B0_PSEAE	K01153	N/A	hypothetical protein PA2732 [Pseudomonas aeruginosa PAO1]	1146	Hypothetical unclassified unknown	3441	0	128.7	1	1	0.01	0.01
26	PA2739	NP_251429	A0A2R3J2S8;A0A8B4ZZG3	6.1.1.20	Q9I0A4	SYFB_PSEAE	K01890	N/A	phenylalanine--tRNA ligase subunit beta [Pseudomonas aeruginosa PAO1]	792	Aminoacyl-tRNA biosynthesis,Phenylalanine, tyrosine and tryptophan biosynthesis,Translation post translation modification degradation	2379	pheT	86.8	2	2	0.06	0.06
27	PA3034	NP_251724	A0A1C7BYZ0	N/A	Q9HZH4	Q9HZH4_PSEAE	N/A	N/A	transcriptional regulator [Pseudomonas aeruginosa PAO1]	185	Transcriptional regulators	558	0	21	1	1	0.07	0.07
28	PA3070	NP_251760	A0A8G6QDG7	N/A	Q9HZD8	Q9HZD8_PSEAE	K03924	N/A	hypothetical protein PA3070 [Pseudomonas aeruginosa PAO1]	326	Hypothetical unclassified unknown	981	0	36.1	1	1	0.05	0.05
29	PA3120	NP_251810	A0A073A4J2;A0A8I0ZS39	4.2.1.33	Q9HZA4	LEUD_PSEAE	K01704	Valine, leucine and isoleucine biosynthesis;C5-Branched dibasic acid metabolism;Metabolic pathways;Biosynthesis of secondary metabolites;2-Oxocarboxylic acid metabolism;Biosynthesis of amino acids	isopropylmalate isomerase small subunit [Pseudomonas aeruginosa PAO1]	212	Amino acid biosynthesis and metabolism,Valine, leucine and isoleucine biosynthesis	639	leuD	24	1	1	Could Not Be Accurately Determined	0.08
30	PA3168	NP_251858	A0A8F9P3N0	N/A	P48372	GYRA_PSEAE	K02469	N/A	DNA gyrase subunit A [Pseudomonas aeruginosa PAO1]	923	DNA replication recombination modification and repair	2772	gyrA	101.1	1	1	0.01	0.02
31	PA3272	NP_251962	A0A8G3PNJ6	N/A	Q9HYW9	Q9HYW9_PSEAE	K03724	N/A	ATP-dependent DNA helicase [Pseudomonas aeruginosa PAO1]	1448	DNA replication recombination modification and repair	4347	0	158.9	1	1	Could Not Be Accurately Determined	Could Not Be Accurately Determined
32	PA3326	NP_252016	A0A8G8GRN6	N/A	Q9HYR9	CLPP2_PSEAE	K01358	N/A	ATP-dependent Clp protease proteolytic subunit [Pseudomonas aeruginosa PAO1]	201	Cell wall LPS capsule,Translation post translation modification degradation	606	clpP2	22.1	1	7	0.12	0.6
33	PA3696	NP_252386	A0A8A9AEA1	N/A	Q9HXU4	Q9HXU4_PSEAE	N/A	N/A	hypothetical protein PA3696 [Pseudomonas aeruginosa PAO1]	248	Hypothetical unclassified unknown	747	0	26.6	1	2	0.06	0.16
34	PA3855	NP_252544	A0A8G2S3Z4	N/A	Q9HXF1	Q9HXF1_PSEAE	N/A	N/A	hypothetical protein PA3855 [Pseudomonas aeruginosa PAO1]	233	Hypothetical unclassified unknown	702	0	26.3	1	2	0.06	0.13
35	PA3987	NP_252676	A0A8G2PC44	N/A	Q9HX33	SYL_PSEAE	K01869	N/A	leucine--tRNA ligase [Pseudomonas aeruginosa PAO1]	873	Amino acid biosynthesis and metabolism,Aminoacyl-tRNA biosynthesis,Translation post translation modification degradation,Valine, leucine and isoleucine biosynthesis	2622	leuS	97.6	1	1	0.02	0.01
36	PA3989	NP_252678	A0A8G6YW32	N/A	Q9HX31	Q9HX31_PSEAE	K02340	N/A	DNA polymerase III subunit delta [Pseudomonas aeruginosa PAO1]	345	DNA replication recombination modification and repair	1038	holA	37.4	2	1	0.16	0.08
37	PA3997	NP_252686	A0A8G7C156	N/A	Q9X6V9	LIPB_PSEAE	K03801	Lipoic acid metabolism;Metabolic pathways;Biosynthesis of cofactors	lipoate-protein ligase B [Pseudomonas aeruginosa PAO1]	217	Amino acid biosynthesis and metabolism,Biosynthesis of cofactors, prosthetic groups and carriers,Folate biosynthesis,Lysine degradation,Ubiquinone biosynthesis	654	lipB	23.9	1	2	0.1	0.16
38	PA4060	NP_252749	A0A0C7CX31	N/A	Q9HWW8	Q9HWW8_PSEAE	N/A	N/A	hypothetical protein PA4060 [Pseudomonas aeruginosa PAO1]	92	Hypothetical unclassified unknown	279	0	10.7	1	1	Could Not Be Accurately Determined	Could Not Be Accurately Determined
39	PA4439	NP_253129	A0A8G2TH40	N/A	Q9HVX6	SYW_PSEAE	K01867	N/A	tryptophan--tRNA ligase [Pseudomonas aeruginosa PAO1]	448	Amino acid biosynthesis and metabolism,Aminoacyl-tRNA biosynthesis,Translation post translation modification degradation,Tryptophan metabolism	1347	trpS	49	1	1	0.02	0.02
40	PA4544	NP_253234	A0A643EDE2	5.4.99.-	P33640	RLUD_PSEAE	K06180	N/A	pseudouridine synthase [Pseudomonas aeruginosa PAO1]	320	Transcription RNA processing and degradation	963	rluD	35.6	1	1	0.08	0.08
41	PA4560	NP_253250	A0A8G6LID5	N/A	Q9HVM4	SYI_PSEAE	K01870	N/A	isoleucine--tRNA ligase [Pseudomonas aeruginosa PAO1]	943	Amino acid biosynthesis and metabolism,Aminoacyl-tRNA biosynthesis,Translation post translation modification degradation,Valine, leucine and isoleucine biosynthesis	2832	ileS	105.5	4	1	0.08	0.02
42	PA4702	NP_253390	A0A2R3IKZ0;A0A643J6Q7	N/A	Q9HV95	Q9HV95_PSEAE	N/A	N/A	hypothetical protein PA4702 [Pseudomonas aeruginosa PAO1]	115	Hypothetical unclassified unknown	348	0	12.9	1	1	Could Not Be Accurately Determined	0.17
43	PA4767	NP_253455	A0A069Q2K1	N/A	O68560	RATA_PSEAE	N/A	N/A	hypothetical protein PA4767 [Pseudomonas aeruginosa PAO1]	144	Hypothetical unclassified unknown	435	0	16	1	1	0.08	0.07
44	PA4936	NP_253623	A0A072ZJM9	2.1.1.185	Q9HUM8	RLMB_PSEAE	K03218	N/A	23S rRNA (guanosine(2251)-2'-O)-methyltransferase RlmB [Pseudomonas aeruginosa PAO1]	248	Transcription RNA processing and degradation	747	0	27.1	4	2	0.28	0.17
45	PA5013	NP_253700	A0A431X9Y9	2.6.1.42	O86428	ILVE_PSEAE	K00826	Cysteine and methionine metabolism;Valine, leucine and isoleucine degradation;Valine, leucine and isoleucine biosynthesis;Pantothenate and CoA biosynthesis;Glucosinolate biosynthesis;Metabolic pathways;Biosynthesis of secondary metabolites;2-Oxocarboxylic acid metabolism;Biosynthesis of amino acids;Biosynthesis of cofactors	branched-chain amino acid aminotransferase [Pseudomonas aeruginosa PAO1]	307	Amino acid biosynthesis and metabolism,Pantothenate and CoA biosynthesis,Valine, leucine and isoleucine biosynthesis,Valine, leucine and isoleucine degradation	924	ilvE	34.1	1	4	0.07	0.21
46	PA5187	NP_253874	A0A3M5EVP5	N/A	Q9HU02	Q9HU02_PSEAE	K20035	Sulfur metabolism;Metabolic pathways	acyl-CoA dehydrogenase [Pseudomonas aeruginosa PAO1]	596	Putative enzymes	1791	0	64.6	1	1	0.04	0.02
47	PA5344	NP_254031	A0A071KTW5	N/A	Q9HTL4	Q9HTL4_PSEAE	K04761	N/A	transcriptional regulator [Pseudomonas aeruginosa PAO1]	310	Transcriptional regulators	933	oxyR	34.3	2	2	0.09	0.07
48	PA5499	NP_254186	A0A069PZQ7	N/A	Q9HT74	Q9HT74_PSEAE	K09823	N/A	transcriptional regulator [Pseudomonas aeruginosa PAO1]	167	Transcriptional regulators	504	zur	18.2	2	1	0.24	0.08
49	PA5547	NP_254234	A0A071LFS8	N/A	Q9HT27	Q9HT27_PSEAE	K18697	Glycerophospholipid metabolism	hypothetical protein PA5547 [Pseudomonas aeruginosa PAO1]	207	Hypothetical unclassified unknown	624	0	23.7	1	1	0.08	0.08
50	PA5563	NP_254250	A0A8G4NCP1	N/A	Q9HT11	Q9HT11_PSEAE	K03496	N/A	chromosome partitioning protein Soj [Pseudomonas aeruginosa PAO1]	262	Cell division	789	soj	28.6	2	5	0.1	0.34

## Sheet: AUM_sta_LB_log
Protein ID	Locus_Tag	## Accession	Provided_UniProt_Accessions	Enzyme_Classification_Number	UniProtKB Accession	UniProtKB ID	KEGG_Ortholog	Pathways	Annotation	Sequence_Length	Function	Gene Length	Gene Name	Estimated MW (kDa)	CumulativePartialPeptideSequences		AverageSequenceCoverage
															AUM_sta	LB_log	AUM_sta	LB_log
1	PA0040	NP_248730	A0A8G3ZSQ7	N/A	Q9I792	Q9I792_PSEAE	K07326	Pertussis	hypothetical protein PA0040 [Pseudomonas aeruginosa PAO1]	562	Hypothetical unclassified unknown	1689	0	63.2	2	5	0.06	0.12
2	PA0041	NP_248731	A0A8A9AAM5;A0A8G7H0Q4	N/A	Q9I791	Q9I791_PSEAE	K15125	Pertussis	hemagglutinin [Pseudomonas aeruginosa PAO1]	3535	Secreted factors (toxins, enzymes, alginate)	10608	0	361.6	2	1	0.01	0
3	PA0308	NP_248999	A0A0D6FI81	N/A	Q9I6I3	Q9I6I3_PSEAE	N/A	N/A	hypothetical protein PA0308 [Pseudomonas aeruginosa PAO1]	339	Hypothetical unclassified unknown	1020	0	38.2	3	3	0.09	0.13
4	PA0341	NP_249032	A0A069Q9D9	2.5.1.145	Q9I6F2	LGT_PSEAE	K13292	N/A	prolipoprotein diacylglyceryl transferase [Pseudomonas aeruginosa PAO1]	266	Fatty acid and phospholipid metabolism,Translation post translation modification degradation	801	lgt	29.8	1	2	0.07	0.14
5	PA0690	NP_249381	A0A8F9JVS6;A0A8G4CTB5	N/A	Q9I5N6	Q9I5N6_PSEAE	N/A	N/A	hypothetical protein PA0690 [Pseudomonas aeruginosa PAO1]	4180	Hypothetical unclassified unknown	12543	pdtA	430	1	1	Could Not Be Accurately Determined	0
6	PA1237	NP_249928	A0A8G2UVQ1	N/A	Q9I4A1	Q9I4A1_PSEAE	K03543	N/A	multidrug resistance efflux pump [Pseudomonas aeruginosa PAO1]	383	Antibiotic resistance and susceptibility,Transport of small molecules	1152	0	42.6	1	2	0.03	0.05
7	PA1305	NP_249996	A0A069Q0L0	N/A	Q9I439	Q9I439_PSEAE	N/A	N/A	hypothetical protein PA1305 [Pseudomonas aeruginosa PAO1]	157	Membrane proteins	474	0	18.2	1	1	0.09	0.09
8	PA1443	NP_250134	A0A8G2KP90	N/A	Q51465	FLIM_PSEAE	K02416	N/A	flagellar motor switch protein FliM [Pseudomonas aeruginosa PAO1]	323	Adaptation protection,Chemotaxis,Flagella assembly,Motility	972	fliM	36.3	1	1	0.02	0.02
9	PA1581	NP_250272	A0A241XT28	N/A	Q9I3D7	Q9I3D7_PSEAE	K00241	Citrate cycle (TCA cycle);Oxidative phosphorylation;Butanoate metabolism;Carbon fixation pathways in prokaryotes;Metabolic pathways;Biosynthesis of secondary metabolites;Microbial metabolism in diverse environments;Carbon metabolism	succinate dehydrogenase subunit C [Pseudomonas aeruginosa PAO1]	128	Citrate cycle (TCA cycle),Energy metabolism,Oxidative phosphorylation	387	sdhC	13.7	1	1	0.06	0.06
10	PA1592	NP_250283	A0A080VSP4	N/A	Q9I3C9	Q9I3C9_PSEAE	N/A	N/A	hypothetical protein PA1592 [Pseudomonas aeruginosa PAO1]	78	Hypothetical unclassified unknown	237	0	7.8	1	1	0.65	0.65
11	PA1847	NP_250538	A0A072ZHP3;Q9WVU9	N/A	Q9I2P8	NFUA_PSEAE	K07400	N/A	Fe/S biogenesis protein NfuA [Pseudomonas aeruginosa PAO1]	194	Adaptation protection,Antibiotic resistance and susceptibility	585	nfuA	21.1	1	1	Could Not Be Accurately Determined	0.07
12	PA1872	NP_250563	A0A0H2ZA60	N/A	G3XD32	G3XD32_PSEAE	N/A	N/A	hypothetical protein PA1872 [Pseudomonas aeruginosa PAO1]	263	Hypothetical unclassified unknown	792	0	27.8	1	1	0.06	0.04
13	PA2526	NP_251216	A0A8G4CW98	N/A	Q9I0V7	Q9I0V7_PSEAE	K07789	Two-component system	resistance-nodulation-cell division (RND) efflux transporter [Pseudomonas aeruginosa PAO1]	1036	Antibiotic resistance and susceptibility,Membrane proteins,Transport of small molecules	3111	muxC	111.8	1	1	0.02	0.01
14	PA2533	NP_251223	A0A071L1E3	N/A	Q9I0V1	Q9I0V1_PSEAE	K03310	N/A	sodium:alanine symporter [Pseudomonas aeruginosa PAO1]	449	Membrane proteins,Transport of small molecules	1350	0	47.3	1	1	0.06	0.06
15	PA2539	NP_251229	A0A0F7QRU6	N/A	Q9I0U5	Q9I0U5_PSEAE	N/A	N/A	hypothetical protein PA2539 [Pseudomonas aeruginosa PAO1]	437	Membrane proteins	1314	0	48.3	1	3	0.05	0.12
16	PA2651	NP_251341	A0A071KVK4	N/A	Q9I0I7	Q9I0I7_PSEAE	N/A	N/A	hypothetical protein PA2651 [Pseudomonas aeruginosa PAO1]	352	Hypothetical unclassified unknown	1059	0	38.4	1	1	0.04	0.03
17	PA2734	NP_251424	A0A6B1Y7D9;A0A8B5A337	N/A	Q9I0A8	Q9I0A8_PSEAE	K01154	N/A	hypothetical protein PA2734 [Pseudomonas aeruginosa PAO1]	431	Hypothetical unclassified unknown	1296	0	48.7	1	1	Could Not Be Accurately Determined	0.05
18	PA2925	NP_251615	A0A8A4EY05	N/A	Q9HZS2	Q9HZS2_PSEAE	K10015	N/A	histidine ABC transporter permease HisM [Pseudomonas aeruginosa PAO1]	237	Amino acid biosynthesis and metabolism,Membrane proteins,Transport of small molecules	714	hisM	26.7	1	1	0.03	0.03
19	PA2989	NP_251679	A0A0A8RGT1	N/A	Q9HZL5	Q9HZL5_PSEAE	N/A	N/A	hypothetical protein PA2989 [Pseudomonas aeruginosa PAO1]	199	Hypothetical unclassified unknown	765	0	28.4	2	1	0.13	0.13
20	PA2998	NP_251688	A0A069QDF8	7.2.1.1	Q9HZK7	NQRB_PSEAE	K00347	N/A	Na(+)-translocating NADH-quinone reductase subunit B [Pseudomonas aeruginosa PAO1]	403	Energy metabolism	1212	nqrB	44.1	2	2	0.05	0.05
21	PA3098	NP_251788	A0A3M5DX18	N/A	Q00517	GSPJ_PSEAE	K02459	Biofilm formation - Vibrio cholerae	type II secretion system protein J [Pseudomonas aeruginosa PAO1]	237	Protein secretion export apparatus	714	xcpW	27.1	1	1	0.06	0.07
22	PA3195	NP_251885	A0A3M5DZS1;A0A659BR27	1.2.1.-	P27726	G3P_PSEAE	K00134	Glycolysis / Gluconeogenesis;Carbon fixation in photosynthetic organisms;Metabolic pathways;Biosynthesis of secondary metabolites;Microbial metabolism in diverse environments;Carbon metabolism;Biosynthesis of amino acids;Pathogenic Escherichia coli infection	glyceraldehyde 3-phosphate dehydrogenase [Pseudomonas aeruginosa PAO1]	334	Carbon compound catabolism,Energy metabolism,Glycolysis / Gluconeogenesis	1005	gapA	36.2	11	1	0.44	0.05
23	PA3206	NP_251896	A0A077JQD4	2.7.13.3	Q9HZ34	Q9HZ34_PSEAE	K02484	N/A	two-component sensor [Pseudomonas aeruginosa PAO1]	445	Two component regulatory systems,Two-component System	1338	cpxS	50.3	1	1	0.02	0.02
24	PA3242	NP_251932	A0A8G2VVF1	N/A	Q9HYZ8	Q9HYZ8_PSEAE	K02517	Lipopolysaccharide biosynthesis;Metabolic pathways	lipid A biosynthesis lauroyl acyltransferase [Pseudomonas aeruginosa PAO1]	312	Cell wall LPS capsule,Lipopolysaccharide biosynthesis	939	htrB2	36.1	2	3	0.1	0.13
25	PA3263	NP_251953	A0A8G5NJM7	N/A	Q9HYX7	RDGC_PSEAE	K03554	N/A	recombination associated protein RdgC [Pseudomonas aeruginosa PAO1]	306	Hypothetical unclassified unknown	921	rdgC	34	3	2	0.17	0.08
26	PA3304	NP_251994	A0A8G3PLU7	N/A	Q9HYU0	Q9HYU0_PSEAE	N/A	N/A	hypothetical protein PA3304 [Pseudomonas aeruginosa PAO1]	285	Hypothetical unclassified unknown	858	0	31.5	1	1	0.09	0.08
27	PA3310	NP_252000	A0A3M5DW40	N/A	Q9HYT4	Q9HYT4_PSEAE	K03760	Lipopolysaccharide biosynthesis;Metabolic pathways;Cationic antimicrobial peptide (CAMP) resistance	hypothetical protein PA3310 [Pseudomonas aeruginosa PAO1]	551	Membrane proteins	1656	0	61.4	1	1	0.02	0.04
28	PA3461	NP_252151	A0A069QA41;A0A8G7GUT7	N/A	Q9HYE5	Q9HYE5_PSEAE	N/A	N/A	hypothetical protein PA3461 [Pseudomonas aeruginosa PAO1]	398	Hypothetical unclassified unknown	1197	0	43.3	3	1	0.11	Could Not Be Accurately Determined
29	PA3607	NP_252297	A0A6H3GKS9	N/A	Q9HY19	POTA2_PSEAE	K11072	N/A	polyamine transporter ATP-binding protein PotA [Pseudomonas aeruginosa PAO1]	363	Transport of small molecules	1092	potA	40	1	5	0.05	0.22
30	PA3623	NP_252313	A0A8G4TCZ1	N/A	P45682	NLPD_PSEAE	K06194	N/A	hypothetical protein PA3623 [Pseudomonas aeruginosa PAO1]	297	Hypothetical unclassified unknown	894	0	30.8	1	3	0.04	0.13
31	PA3826	NP_252515	A0A080VFB0	N/A	Q9HXH6	Q9HXH6_PSEAE	N/A	N/A	hypothetical protein PA3826 [Pseudomonas aeruginosa PAO1]	165	Membrane proteins	498	0	18.9	1	1	0.05	0.05
32	PA3853	NP_252542	A0A8G6VYP8	N/A	Q9HXF3	Q9HXF3_PSEAE	K00638	N/A	transferase [Pseudomonas aeruginosa PAO1]	229	Putative enzymes	690	0	25.6	1	2	0.04	0.1
33	PA4375	NP_253065	A0A080VSZ8;A0A2R3ILZ5	N/A	Q9HW27	Q9HW27_PSEAE	K18138	beta-Lactam resistance;Cationic antimicrobial peptide (CAMP) resistance	multidrug efflux protein [Pseudomonas aeruginosa PAO1]	1018	Membrane proteins,Transport of small molecules	3057	mexW	110.5	2	4	0.02	0.05
34	PA4415	NP_253105	A0A069PYV0	2.7.8.13	Q9HVZ8	MRAY_PSEAE	K01000	Metabolic pathways;Vancomycin resistance	phospho-N-acetylmuramoyl-pentapeptide-transferase [Pseudomonas aeruginosa PAO1]	360	Cell wall LPS capsule,Peptideglycan biosynthesis	1083	mraY	39.7	1	1	0.03	0.03
35	PA4425	NP_253115	A0A8B5B7W6	N/A	Q9HVZ0	GMHA_PSEAE	K03271	Lipopolysaccharide biosynthesis;Metabolic pathways;Biosynthesis of nucleotide sugars	phosphoheptose isomerase [Pseudomonas aeruginosa PAO1]	197	Putative enzymes	594	0	21.4	1	1	0.16	0.09
36	PA4743	NP_253431	A0A367M4U0	N/A	Q9HV56	RBFA_PSEAE	K02834	N/A	ribosome-binding factor A [Pseudomonas aeruginosa PAO1]	129	Adaptation protection,Translation post translation modification degradation	390	rbfA	14.5	2	2	0.26	0.2
37	PA4831	NP_253518	A0A072ZJU1	N/A	Q9HUX9	Q9HUX9_PSEAE	K16137	N/A	transcriptional regulator [Pseudomonas aeruginosa PAO1]	186	Transcriptional regulators	561	0	20.5	2	1	0.17	0.1
38	PA4919	NP_253606	A0A080VRS6	6.3.4.21	Q9HUP4	PNCB1_PSEAE	K00763	Nicotinate and nicotinamide metabolism;Metabolic pathways;Biosynthesis of cofactors	nicotinate phosphoribosyltransferase [Pseudomonas aeruginosa PAO1]	399	Biosynthesis of cofactors, prosthetic groups and carriers,Nicotinate and nicotinamide metabolism	1200	pncB1	46.1	1	1	0.04	0.03
39	PA5069	NP_253756	A0A080VJH4	N/A	Q9HUB4	TATB_PSEAE	K03117	N/A	sec-independent translocase [Pseudomonas aeruginosa PAO1]	141	Protein secretion export apparatus	426	tatB	14.9	1	1	0.06	0.06
40	PA5225	NP_253912	A0A072ZJ12	N/A	Q9HTW5	YGFB_PSEAE	K09895	N/A	hypothetical protein PA5225 [Pseudomonas aeruginosa PAO1]	184	Hypothetical unclassified unknown	555	0	19.4	1	2	0.06	0.21
41	PA5233	NP_253920	A0A072ZJ18	N/A	Q9HTV7	Q9HTV7_PSEAE	K02415	N/A	flagellar basal body protein FliL [Pseudomonas aeruginosa PAO1]	139	Hypothetical unclassified unknown	420	0	15.2	1	2	0.15	0.26
42	PA5268	NP_253955	A0A072ZJK9	N/A	Q9HTT2	Q9HTT2_PSEAE	K03284	N/A	magnesium/cobalt transporter [Pseudomonas aeruginosa PAO1]	326	Membrane proteins,Transport of small molecules	981	corA	37.3	1	2	0.04	0.1
43	PA5367	NP_254054	A0A3M5DZ58	N/A	Q9HTJ5	Q9HTJ5_PSEAE	K02038	N/A	phosphate ABC transporter permease [Pseudomonas aeruginosa PAO1]	558	Membrane proteins,Transport of small molecules	1677	pstA	61.2	1	3	0.03	0.08
44	PA5375	NP_254062	A0A0A8RJS4	N/A	Q9HTI9	Q9HTI9_PSEAE	K02168	N/A	choline transporter BetT [Pseudomonas aeruginosa PAO1]	516	Membrane proteins,Transport of small molecules	1551	betT1	56.1	1	1	0.02	0.02
45	PA5394	NP_254081	A0A8G3SUB7	N/A	Q9HTH0	CLSA_PSEAE	K06131	Glycerophospholipid metabolism;Metabolic pathways	cardiolipin synthetase [Pseudomonas aeruginosa PAO1]	490	Fatty acid and phospholipid metabolism	1473	cls	54.6	1	1	0.04	0.04
46	PA5451	NP_254138	A0A2R3J1E2	N/A	Q9HTB8	Q9HTB8_PSEAE	K09690	N/A	LPS efflux transporter membrane protein [Pseudomonas aeruginosa PAO1]	265	Cell wall LPS capsule,Lipopolysaccharide biosynthesis,Membrane proteins,Transport of small molecules	798	wzm	29.5	1	1	0.05	0.05
47	PA5504	NP_254191	A0A069PZR3	N/A	Q9HT69	Q9HT69_PSEAE	K02072	N/A	D-methionine ABC transporter [Pseudomonas aeruginosa PAO1]	225	Membrane proteins,Transport of small molecules	678	0	24.4	2	1	0.16	0.08
48	PA5510	NP_254197	A0A072ZFM9	N/A	Q9HT63	Q9HT63_PSEAE	N/A	N/A	transporter [Pseudomonas aeruginosa PAO1]	449	Membrane proteins,Transport of small molecules	1350	0	48.8	1	1	0.03	0.03
49	PA5529	NP_254216	A0A8G4A6W9	N/A	Q9HT44	Q9HT44_PSEAE	K03455	N/A	sodium/proton antiporter [Pseudomonas aeruginosa PAO1]	585	Membrane proteins,Transport of small molecules	1758	0	63.6	1	1	0.02	0.02
50	PA5549	NP_254236	A0A1C7C590;A0A241XPH6	2.6.1.16	Q9HT25	GLMS_PSEAE	K00820	Alanine, aspartate and glutamate metabolism;Amino sugar and nucleotide sugar metabolism;Metabolic pathways;Biosynthesis of nucleotide sugars	glucosamine--fructose-6-phosphate aminotransferase [Pseudomonas aeruginosa PAO1]	611	Aminosugars metabolism,Central intermediary metabolism,Glutamate metabolism	1836	glmS	66.3	1	2	Could Not Be Accurately Determined	0.08

[truncated: 5 more sheets: AUM_log_sta_LB_log, AUM_log_sta_LB_sta, AUM_log_LB_log_sta, AUM_sta_LB_log_sta, AUM_log_sta_LB_log_sta]
